# Supplementary material for: Insights into the synergistic influence of [Emim][OAc] and AgOAc for the hydration of propargylic alcohols to α-hydroxy ketones in the presence of CO2
Source: Royal Society of Chemistry journal article supplement (doi:10.1039/d1cy01064f), 2021-01-01
Supplement: d1cy01064f1.pdf [file d1cy01064f1.pdf]

## Supporting Information

Insights into the synergistic influence of [Emim][OAc] and AgOAc  
for the hydration of propargylic alcohols to  $\alpha$ -hydroxy ketones in the  
presence of CO<sub>2</sub>

Yuhang Hu, Shuya Dong, Zhengkun Zhang, Li Wang,\* Jinglai Zhang\*

Henan Engineering Research Center of Green Anticorrosion Technology for Magnesium Alloys,  
Henan University, Kaifeng, Henan 475004, PRChina;

Henan Engineering Research Center of Corrosion and Protection for Magnesium Alloys, Henan  
University, Kaifeng, Henan 475004, PRChina;

College of Chemistry and Chemical Engineering, Henan University, Kaifeng, Henan 475004,  
PRChina.



**Fig. S1** The energy profile along with the schematic structures of all transition states and intermediates involved in Route 1 calculated at the M06/6-311+G(2d,2p) (PCM)/B3PW91/6-31G(d,p) level.



**Fig. S2** The energy profile along with the schematic structures of all transition states and intermediates involved in Route 2 calculated at the M06/6-311+G(2d,2p) (PCM)/B3PW91/6-31G(d,p) level.

**Table S1** Experimental results by Li et al.<sup>1</sup> Hydration of propargylic alcohol promoted by different ILs/Ag salts catalyst in the presence of CO<sub>2</sub>.



| Entry             | Ag salt                         | IL                        | Yield |
|-------------------|---------------------------------|---------------------------|-------|
| 1                 | AgCl                            | /                         | /     |
| 2                 | /                               | [Emim][OAc]               | /     |
| 3 <sup>[a]</sup>  | AgCl                            | [Emim][OAc]               | 8%    |
| 4                 | AgCl                            | [Emim][OAc]               | 70%   |
| 5                 | AgBr                            | [Emim][OAc]               | 67%   |
| 6                 | AgI                             | [Emim][OAc]               | 58%   |
| 7                 | AgOAc                           | [Emim][OAc]               | 79%   |
| 8                 | AgCF <sub>3</sub> COO           | [Emim][OAc]               | 73%   |
| 9                 | AgNO <sub>3</sub>               | [Emim][OAc]               | 72%   |
| 10                | Ag <sub>2</sub> CO <sub>3</sub> | [Emim][OAc]               | 62%   |
| 11                | Ag <sub>2</sub> O               | [Emim][OAc]               | 45%   |
| 12                | AgOAc                           | [Emim][Br]                | /     |
| 13                | AgOAc                           | [Emim][NO <sub>3</sub> ]  | /     |
| 14                | AgOAc                           | [Emim][OTf]               | /     |
| 15                | AgOAc                           | [Emim][BF <sub>4</sub> ]  | /     |
| 16                | AgOAc                           | [N <sub>4444</sub> ][OAc] | 47%   |
| 17                | AgOAc                           | [DBUH][OAc]               | 25%   |
| 18                | AgOAc                           | [DBUH][2-methyl-Im]       | 2%    |
| 19 <sup>[b]</sup> | AgOAc                           | [Emim][OAc]               | 95%   |

<sup>[a]</sup>In the absence of CO<sub>2</sub>; <sup>[b]</sup>6 h.



**Fig. S3** Geometric data of CO<sub>2</sub>, propargylic alcohol, and  $\alpha$ -hydroxy ketone (the theoretical and experimental values are shown in black colour and red colour, respectively; bond lengths in Å and bond angles in degrees). Note that the experimental values of 2-propynal,<sup>3,4</sup> 2-methyl propanenitrile,<sup>5</sup> 2-propen-1-ol<sup>6,7</sup> and 2-butanone<sup>8</sup> are employed due to the absence of experimental values for propargylic alcohol and  $\alpha$ -hydroxy ketone, respectively.

**Table S2** The experimental FT-IR characteristic peaks and theoretical vibrational frequencies (in  $\text{cm}^{-1}$ ) of  $\text{CO}_2$ ,<sup>2</sup> propargylic alcohol,<sup>1</sup> and  $\alpha$ -hydroxy ketone.<sup>1</sup>

|                          | Theoretical value | Experimental value |
|--------------------------|-------------------|--------------------|
| $\text{CO}_2$            | 647, 2460         | 667, 2350          |
| propargylic alcohol      | 3049, 2246, 3166  | 3000, 2150, 3300   |
| $\alpha$ -hydroxy ketone | 3049, 1822, 3187  | 3000, 1713, 3300   |

Route 6

A





**Fig. S4** The energy profiles along with the schematic structures of all transition states and intermediates involved in Route 6 calculated at the M06/6-311+G(2d,2p) (PCM)//B3PW91/6-31G(d,p) level. (A) represents the steps to form the cyclic carbonates. (B) presents the following steps to form the final product.



**Fig. S5** The energy profile along with the schematic structures of all transition states and intermediates involved in Route 7 to form the cyclic carbonates calculated at the M06/6-311+G(2d,2p) (PCM)//B3PW91/6-31G(d,p) level.

A



TS9-1(a) 1.7 kcal mol<sup>-1</sup>



TS9-1(b) 2.1 kcal mol<sup>-1</sup>



TS9-1(c) 7.6 kcal mol<sup>-1</sup>



TS9-1(d) 7.6 kcal mol<sup>-1</sup>



TS9-1(e) 8.2 kcal mol<sup>-1</sup>



TS9-1(f) 8.7 kcal mol<sup>-1</sup>

B



TS9-2(a) 8.2 kcal mol<sup>-1</sup>



TS9-2(b) 9.4 kcal mol<sup>-1</sup>



TS9-2(c) 10.4 kcal mol<sup>-1</sup>



TS9-2(d) 12.9 kcal mol<sup>-1</sup>



TS9-2(e) 15.9 kcal mol<sup>-1</sup>



TS9-2(f) 36.4 kcal mol<sup>-1</sup>



**Fig. S6** Different configurations for (A) TS9-1, (B) TS9-2 in the Route 9, relative energy of different configurations for (C) TS9-1 and (D) TS9-2.



**Fig. S7** The energy profile along with the schematic structures of all transition states and intermediates involved in Route 10 calculated at the M06/6-311+G(2d,2p)-LANL2DZ (PCM)//B3PW91/6-31G(d,p)-LANL2DZ level.



**Fig. S8** The energy profile along with the schematic structures of all transition states and intermediates involved in Route 11 calculated at the M06/6-311+G(2d,2p)-LANL2DZ (PCM)//B3PW91/6-31G(d,p)-LANL2DZ level.

**Table S3** The enthalpies to form NHC-Ag, AcO-COO<sup>-</sup>, and NHC-CO<sub>2</sub>.

| name                                 | NHC-Ag                                                                            | AcO-COO <sup>-</sup>                                                                | NHC-CO <sub>2</sub>                                                                 |
|--------------------------------------|-----------------------------------------------------------------------------------|-------------------------------------------------------------------------------------|-------------------------------------------------------------------------------------|
| optimize structures                  |  |  |  |
| $\Delta H$ (kcal mol <sup>-1</sup> ) | -80.67                                                                            | -14.63                                                                              | -13.89                                                                              |

**Table S4** The barrier heights (in kcal mol<sup>-1</sup>) of the rate-limiting step for Route 9 and Route 10.

| Methods                                                     | TS9-2 | TS10-2 |
|-------------------------------------------------------------|-------|--------|
| M06/6-311+G(2d,2p)-LANL2DZ (PCM)//B3PW91/6-31G(d,p)-LANL2DZ | 19.13 | 26.06  |
| M06/6-311+G(2d,2p)-SDD (PCM)//B3PW91/6-31G(d,p)-SDD         | 16.87 | 24.85  |
| M06/6-311+G(2d,2p)-LANL2DZ (PCM)//M06/6-31G(d,p)-LANL2DZ    | 18.12 | 27.40  |
| M06/6-311+G(2d,2p)-SDD (PCM)//B3LYP/6-31G(d,p)-LANL2DZ      | 19.62 | 24.61  |
| M06/6-311+G(2d,2p)-LANL2DZ (SMD)//B3PW91/6-31G(d,p)-LANL2DZ | 17.09 | 26.09  |



**Fig. S9** The energy profile along with the schematic structures of all transition states and intermediates involved in Route O1 calculated at the M06/6-311+G(2d,2p)-LANL2DZ (PCM)//B3PW91/6-31G(d,p)-LANL2DZ level.



**Fig. S10** The energy profile along with the schematic structures of all transition states and intermediates involved in Route N1 calculated at the M06/6-311+G(2d,2p)-LANL2DZ (PCM)//B3PW91/6-31G(d,p)-LANL2DZ level.



**Fig. S11** The ESP mapped onto a surface of electron distribution for NHC-Ag complex and AgOAc. Blue colour represents the negative electrostatic potential and red colour represents the positive electrostatic potential.

## References

- 1 D. Li, Y. Y. Gong, M. C. Du, C. Bu, C. Chen, S. Chaemcheun, J. Hu, Y. X. Zhang, Y. Yuan and F. Verpoort, *ACS Sustainable Chem. Eng.*, 2020, **8**, 8148-8155.
- 2 G. Herzberg. Electronic spectra and electronic structure of polyatomic molecules, Van Nostrand, New York, 1966.
- 3 K. Kuchitsu(ed). Structure of Free Polyatomic Molecules - Basic Data, Springer, Berlin, 1998.
- 4 J. Barros, D. Appadoo, D. McNaughton, E. G. Robertson, C. Medcraft, R. Plathe, P. Roy and L. Manceron, *Journal of Molecular Spectroscopy*, 2015, **307**, 44-48.
- 5 K. Kuchitsu (ed.). Landolt-Bornstein: Group II: Atomic and Molecular Physics Volume 15: Structure Data of Free Polyatomic Molecules. Springer-Verlag, Berlin, 1987.
- 6 F. Vanhouteghem, W, Pyckhout, C, van Alsenoy and L, van den Enden, *J. Mol. Struct.*, 1986, **140**, 33-48.
- 7 K. Kuchitsu(ed.). Landolt-Bornstein: Group II: Atomic and Molecular Physics Volume 21: Structure Data of Free Polyatomic Molecules. Springer-Verlag, Berlin, 1992.
- 8 J. F. Sullivan, A. Y. Wang, M. S. Cheng, and J. R. Durig, *Can. J. Chem.*, 1991, **69**, 1845-1856.

Table S5 Following are the cartesian coordinates of the optimized intermediates and transition states, along with the calculated absolute energies (in hartree).

| CO <sub>2</sub>      |             | HF=-188.5640509 |             |
|----------------------|-------------|-----------------|-------------|
| C                    | 0.00000000  | 0.00000000      | 0.00000000  |
| O                    | 0.00000000  | 0.00000000      | 1.16748800  |
| O                    | 0.00000000  | 0.00000000      | -1.16748800 |
| H <sub>2</sub> O     |             | HF=-76.4266426  |             |
| O                    | 0.00000000  | 0.00000000      | 0.11863500  |
| H                    | 0.00000000  | 0.75790700      | -0.47454100 |
| H                    | 0.00000000  | -0.75790700     | -0.47454100 |
| propargylic alcohols |             | HF=-270.3959778 |             |
| C                    | 2.37383400  | -0.00002400     | -0.03247100 |
| H                    | 3.43954300  | -0.00000700     | -0.06813000 |
| C                    | 1.16766100  | -0.00005300     | 0.02335300  |
| C                    | -0.30345700 | -0.00000400     | 0.03772500  |
| O                    | -0.69254500 | 0.00001200      | 1.41259400  |
| H                    | -1.65792200 | 0.00011300      | 1.42421400  |
| C                    | -0.82533200 | 1.26712900      | -0.65658200 |
| H                    | -0.49071200 | 1.31783300      | -1.69634400 |
| H                    | -1.92196200 | 1.26955500      | -0.65070700 |
| H                    | -0.46960500 | 2.15415800      | -0.12773800 |
| C                    | -0.82542800 | -1.26710100     | -0.65657400 |
| H                    | -0.46976600 | -2.15415800     | -0.12773200 |
| H                    | -1.92205700 | -1.26944400     | -0.65068600 |
| H                    | -0.49082100 | -1.31783200     | -1.69633900 |
| [Emim][OAc]          |             | HF=-573.0218024 |             |
| C                    | -2.94253400 | -0.78045300     | -0.18041300 |
| C                    | -2.70253700 | 0.54139700      | -0.37234800 |
| N                    | -1.70780100 | -1.36582200     | 0.04017300  |

|   |             |             |             |
|---|-------------|-------------|-------------|
| H | -3.86568100 | -1.33968400 | -0.18952000 |
| H | -3.37931800 | 1.35640100  | -0.57907500 |
| N | -1.33354300 | 0.71020000  | -0.26548900 |
| C | -0.63939000 | 1.99291600  | -0.37487900 |
| H | -1.00470300 | 2.49823100  | -1.27595300 |
| H | 0.42050500  | 1.75970900  | -0.51360100 |
| C | -0.84254200 | 2.86670500  | 0.85631900  |
| H | -0.30129500 | 3.80950500  | 0.73385300  |
| H | -1.89889000 | 3.10167900  | 1.02476700  |
| H | -0.45514500 | 2.36620900  | 1.74816900  |
| C | -1.49607700 | -2.77906400 | 0.28744000  |
| H | -1.86201200 | -3.37694600 | -0.55253100 |
| H | -0.42531200 | -2.94409800 | 0.40456400  |
| H | -2.01063100 | -3.09310700 | 1.20051700  |
| C | 2.78515600  | -0.13195800 | -0.08659900 |
| O | 2.47945300  | 0.99805700  | -0.44398400 |
| O | 1.93084700  | -1.08053600 | 0.23904900  |
| C | 4.22460800  | -0.58477400 | 0.02785900  |
| H | 4.39648800  | -1.44639800 | -0.62417100 |
| H | 4.89565900  | 0.22883300  | -0.24703500 |
| H | 4.43202700  | -0.90971200 | 1.05181600  |
| C | -0.69762800 | -0.45877100 | -0.00787000 |
| H | 0.93097900  | -0.75742200 | 0.13783800  |

---



---

NHC-Ag/OAc<sup>-</sup>

HF=-718.265285

|   |            |             |             |
|---|------------|-------------|-------------|
| C | 2.94083900 | 1.90313800  | 0.03338600  |
| C | 3.53978600 | 0.70124900  | -0.16711500 |
| C | 1.30936100 | 0.35062700  | -0.12348000 |
| N | 1.58043500 | 1.66675300  | 0.05823700  |
| H | 3.36119800 | 2.89004000  | 0.14987000  |
| H | 4.58277100 | 0.43880600  | -0.25436800 |
| N | 2.52492800 | -0.23165900 | -0.26389500 |
| C | 2.72909900 | -1.66781700 | -0.43112300 |
| H | 3.51429500 | -1.80977100 | -1.18099800 |

|    |             |             |             |
|----|-------------|-------------|-------------|
| H  | 1.79852200  | -2.06571700 | -0.84336100 |
| C  | 3.08301500  | -2.36444000 | 0.87630900  |
| H  | 3.22401500  | -3.43506500 | 0.70118500  |
| H  | 4.00704000  | -1.96623700 | 1.30675800  |
| H  | 2.27932000  | -2.23870900 | 1.60712300  |
| C  | 0.56781800  | 2.69906200  | 0.24152200  |
| H  | 0.62780500  | 3.42829500  | -0.57078800 |
| H  | -0.42202100 | 2.23524800  | 0.23731200  |
| H  | 0.72396400  | 3.20629100  | 1.19719100  |
| C  | -3.30159600 | 0.02672000  | 0.08818900  |
| O  | -2.76110100 | 1.14079700  | 0.22780600  |
| O  | -2.66628900 | -1.07485000 | -0.11693100 |
| C  | -4.81441400 | -0.10402300 | 0.15409700  |
| H  | -5.08976700 | -0.80493500 | 0.94794900  |
| H  | -5.28049000 | 0.86480100  | 0.33824700  |
| H  | -5.18885200 | -0.52215200 | -0.78527700 |
| Ag | -0.63361000 | -0.42683400 | -0.13465900 |

---

AgOAc

HF=-374.2416895

|    |             |             |             |
|----|-------------|-------------|-------------|
| C  | -1.50953700 | 0.00992200  | -0.00699100 |
| O  | -0.91337900 | -1.10975200 | -0.00515800 |
| C  | -3.02647800 | -0.00507700 | 0.00356100  |
| H  | -3.36952400 | -0.40893900 | 0.96072400  |
| H  | -3.42916400 | 0.99813200  | -0.13396400 |
| H  | -3.39185300 | -0.67284000 | -0.78023500 |
| O  | -0.91467200 | 1.12759600  | -0.00482700 |
| Ag | 1.10704300  | -0.00187600 | 0.00114700  |

---

NHC-Ag/NHC-CO<sub>2</sub>

HF=-1022.2279321

|   |            |             |            |
|---|------------|-------------|------------|
| C | 4.92277400 | -1.46322100 | 0.24072000 |
| C | 5.22331900 | -0.13961700 | 0.23006500 |
| C | 2.97943300 | -0.32525000 | 0.14299300 |
| N | 3.54623000 | -1.55481900 | 0.18527300 |
| H | 5.56136400 | -2.33157200 | 0.28998800 |

|    |             |             |             |
|----|-------------|-------------|-------------|
| H  | 6.17560400  | 0.36661900  | 0.26373200  |
| N  | 4.02191100  | 0.53813600  | 0.17326300  |
| C  | 3.90454100  | 1.99459700  | 0.09426300  |
| H  | 4.59978200  | 2.42299700  | 0.82276500  |
| H  | 2.89222400  | 2.24475400  | 0.42181000  |
| C  | 4.17492500  | 2.52858400  | -1.30593300 |
| H  | 4.07733600  | 3.61782300  | -1.31141400 |
| H  | 5.18564200  | 2.27995800  | -1.64218500 |
| H  | 3.46212300  | 2.11507600  | -2.02498300 |
| C  | 2.81451300  | -2.81267200 | 0.19126700  |
| H  | 3.00026300  | -3.35219600 | 1.12335900  |
| H  | 1.74848900  | -2.59908800 | 0.10657100  |
| H  | 3.12500200  | -3.43023500 | -0.65496500 |
| Ag | 0.93112200  | 0.09950300  | 0.05152600  |
| C  | -5.51152800 | -0.73390600 | -0.26808600 |
| C  | -5.37449400 | 0.62185100  | -0.25696100 |
| C  | -3.34653200 | -0.26732200 | -0.15586400 |
| N  | -4.25110700 | -1.26939400 | -0.20632400 |
| H  | -6.39470400 | -1.35104300 | -0.31929300 |
| H  | -6.11698100 | 1.40356500  | -0.29513300 |
| N  | -4.03245700 | 0.89483300  | -0.19132800 |
| C  | -3.49011000 | 2.26683400  | -0.12184800 |
| H  | -4.21063700 | 2.89683500  | -0.64960800 |
| H  | -2.54765600 | 2.26667300  | -0.66605800 |
| C  | -3.28961800 | 2.72592000  | 1.31442800  |
| H  | -2.93530700 | 3.76035300  | 1.31288100  |
| H  | -4.22115000 | 2.68722400  | 1.88633600  |
| H  | -2.53627700 | 2.10884300  | 1.80878200  |
| C  | -3.97936000 | -2.71006800 | -0.20502700 |
| H  | -4.94033400 | -3.22296100 | -0.24453600 |
| H  | -3.36984400 | -2.97317100 | -1.06789600 |
| H  | -3.43687300 | -2.98404000 | 0.69817300  |
| C  | -1.84963000 | -0.46672800 | -0.08383800 |
| O  | -1.44563800 | -1.63188400 | -0.08566100 |

| O                                      | -1.17214300 | 0.60958500      | -0.02725400 |
|----------------------------------------|-------------|-----------------|-------------|
| 2-methyl-4-(pyridin-2-yl)but-3-yn-2-ol |             | HF=-517.3820118 |             |
| C                                      | -0.07522400 | 0.07450000      | -0.00012000 |
| C                                      | -1.28712200 | 0.07863700      | -0.00031600 |
| C                                      | -2.75650800 | 0.03792300      | -0.00011800 |
| O                                      | -3.20179700 | 1.39436000      | -0.00364200 |
| H                                      | -4.16688300 | 1.36686700      | -0.00332700 |
| C                                      | -3.25147600 | -0.68096000     | -1.26553900 |
| H                                      | -2.87830500 | -1.70778400     | -1.31291600 |
| H                                      | -4.34759600 | -0.71645800     | -1.26710700 |
| H                                      | -2.91663900 | -0.14155500     | -2.15430300 |
| C                                      | -3.25126500 | -0.67428700     | 1.26917300  |
| H                                      | -2.91642600 | -0.13006700     | 2.15499700  |
| H                                      | -4.34738100 | -0.70995100     | 1.27103000  |
| H                                      | -2.87792700 | -1.70077900     | 1.32204800  |
| C                                      | 1.35619200  | 0.04059600      | -0.00003400 |
| C                                      | 2.02546900  | -1.19483100     | 0.00031400  |
| C                                      | 3.33632100  | 1.18700400      | -0.00033100 |
| C                                      | 3.41425100  | -1.20191500     | 0.00037300  |
| H                                      | 1.45419400  | -2.11718600     | 0.00054100  |
| H                                      | 3.83201900  | 2.15681900      | -0.00059300 |
| H                                      | 3.95849000  | -2.14221800     | 0.00066800  |
| C                                      | 4.09162500  | 0.01452800      | 0.00004100  |
| H                                      | 5.17616900  | 0.05872400      | 0.00006600  |
| N                                      | 2.00444000  | 1.22022100      | -0.00037400 |

| [N <sub>4444</sub> ][OAc]/AgOAc | HF=-1288.5130197 |            |             |
|---------------------------------|------------------|------------|-------------|
| C                               | 2.76300600       | 2.07166000 | 0.16055600  |
| O                               | 2.29114900       | 0.92611400 | -0.01229200 |
| O                               | 2.09447900       | 3.15505000 | 0.21910800  |
| C                               | 4.27016500       | 2.21768800 | 0.33130900  |
| H                               | 4.57545200       | 1.72700400 | 1.26152900  |
| H                               | 4.78332700       | 1.70540300 | -0.48769000 |

|    |             |             |             |
|----|-------------|-------------|-------------|
| H  | 4.57243900  | 3.26502400  | 0.36223800  |
| Ag | -0.01243300 | 2.95766700  | -0.00069200 |
| C  | 0.16661500  | -1.01719000 | 1.20137800  |
| C  | 1.21210000  | -2.85007800 | -0.16722800 |
| C  | -0.15632000 | -1.01871400 | -1.20116900 |
| C  | -1.18744100 | -2.85950500 | 0.16813700  |
| C  | 0.36731400  | -1.69549500 | 2.54869000  |
| C  | 0.36205400  | -0.64247000 | 3.66423000  |
| C  | 0.59872100  | -1.24611800 | 5.04592800  |
| C  | 2.51612300  | -2.19014500 | -0.59287900 |
| C  | 3.68639500  | -3.16135600 | -0.40040500 |
| C  | 5.00843000  | -2.58644900 | -0.90242000 |
| C  | -2.49681600 | -2.20986600 | 0.59312700  |
| C  | -3.65896100 | -3.19096300 | 0.40166500  |
| C  | -4.98599300 | -2.62596300 | 0.90177600  |
| C  | -0.35257500 | -1.69898100 | -2.54812100 |
| C  | -0.35694700 | -0.64615800 | -3.66384200 |
| C  | -0.59058200 | -1.25187300 | -5.04515000 |
| H  | -0.73177200 | -0.39286500 | 1.19607100  |
| H  | 1.00289800  | -0.35279000 | 0.96026600  |
| H  | 1.33637300  | -3.35935700 | 0.79205800  |
| H  | 0.91742800  | -3.61349200 | -0.89383600 |
| H  | 0.73740200  | -0.38773400 | -1.19623500 |
| H  | -0.99742400 | -0.36040300 | -0.96003200 |
| H  | -0.88666800 | -3.62001500 | 0.89529200  |
| H  | -1.30748900 | -3.37044900 | -0.79080200 |
| H  | -0.42027700 | -2.43223800 | 2.75497200  |
| H  | 1.32350700  | -2.23233300 | 2.58427400  |
| H  | -0.59663500 | -0.10897000 | 3.65200400  |
| H  | 1.13083200  | 0.11029400  | 3.45078500  |
| H  | -0.17443700 | -1.98046700 | 5.29929800  |
| H  | 1.56860400  | -1.75335700 | 5.09947300  |
| H  | 0.58690900  | -0.47299100 | 5.82004500  |
| H  | 2.46070100  | -1.90453700 | -1.64988800 |

|   |             |             |             |
|---|-------------|-------------|-------------|
| H | 2.70135800  | -1.25758600 | -0.04806200 |
| H | 3.47820100  | -4.10802000 | -0.91907700 |
| H | 3.77786200  | -3.41263900 | 0.66519500  |
| H | 4.96437800  | -2.37057600 | -1.97537100 |
| H | 5.25133500  | -1.65122100 | -0.38800300 |
| H | 5.83322200  | -3.28654400 | -0.73715600 |
| H | -2.68980900 | -1.27944200 | 0.04733100  |
| H | -2.44376800 | -1.92261200 | 1.64983200  |
| H | -3.44338000 | -4.13500900 | 0.92208600  |
| H | -3.74769300 | -3.44480400 | -0.66356200 |
| H | -5.80494100 | -3.33303900 | 0.73715400  |
| H | -5.23607700 | -1.69365600 | 0.38552000  |
| H | -4.94448300 | -2.40786900 | 1.97438000  |
| H | -1.30441100 | -2.24359100 | -2.58272700 |
| H | 0.44078800  | -2.42936000 | -2.75495100 |
| H | 0.59755400  | -0.10517100 | -3.65287800 |
| H | -1.13133800 | 0.10056600  | -3.44950300 |
| H | -0.58535400 | -0.47886400 | -5.81945700 |
| H | -1.55671700 | -1.76633500 | -5.09754900 |
| H | 0.18775100  | -1.98050800 | -5.29918600 |
| N | 0.00871100  | -1.94370400 | 0.00021000  |
| C | -2.78088100 | 2.04784100  | -0.16098600 |
| O | -2.12191200 | 3.13719000  | -0.21722200 |
| O | -2.29888600 | 0.90586300  | 0.00770500  |
| C | -4.28954900 | 2.18134400  | -0.32878400 |
| H | -4.60057400 | 3.22614000  | -0.35867800 |
| H | -4.59266700 | 1.68834600  | -1.25848000 |
| H | -4.79680700 | 1.66465900  | 0.49114900  |

---

| Route 1 | CP1-1       | HF=-535.4066021 |             |
|---------|-------------|-----------------|-------------|
| C       | -1.04700300 | 0.23779700      | 1.13233900  |
| C       | -1.30481100 | -0.40965600     | -0.17724900 |
| O       | -0.20495100 | -0.19189900     | -1.05050900 |
| C       | -1.41512700 | -1.92448900     | 0.00888800  |

|   |             |             |             |
|---|-------------|-------------|-------------|
| H | -2.24145400 | -2.17751500 | 0.67788600  |
| H | -1.58974100 | -2.38586000 | -0.96707700 |
| H | -0.48584700 | -2.32256300 | 0.42115400  |
| C | -2.59092000 | 0.16698900  | -0.78768400 |
| H | -2.49283200 | 1.24524100  | -0.94329700 |
| H | -2.76595300 | -0.30964900 | -1.75632800 |
| H | -3.45424100 | -0.01112100 | -0.13989900 |
| H | -0.08730800 | 0.77835500  | -1.12725900 |
| O | 0.32298000  | 2.50039600  | -0.59434300 |
| H | 1.26768300  | 2.31795300  | -0.50761000 |
| C | -0.82705300 | 0.79257000  | 2.18673000  |
| H | -0.64753500 | 1.24326300  | 3.13707900  |
| H | -0.02234300 | 2.35021600  | 0.29810900  |
| C | 2.46242200  | -0.56274700 | -0.01304500 |
| O | 2.65043000  | 0.58144200  | -0.17236500 |
| O | 2.33835600  | -1.70632700 | 0.16813700  |

| Route 1 | TS1-1 | HF=-535.3308051 |  |
|---------|-------|-----------------|--|
|---------|-------|-----------------|--|

|   |             |             |             |
|---|-------------|-------------|-------------|
| C | -0.00376000 | 1.94012700  | 0.29072000  |
| H | -0.21135100 | 2.98528700  | 0.46496100  |
| C | -0.68337400 | 0.89948200  | 0.14103000  |
| C | -1.66639500 | -0.19072000 | -0.01742900 |
| C | -1.59969500 | -1.18522800 | 1.14819800  |
| H | -1.76048200 | -0.68853200 | 2.10979700  |
| H | -2.38042400 | -1.93630700 | 1.00060600  |
| H | -0.62567700 | -1.67616900 | 1.15793800  |
| C | -3.03240500 | 0.52570700  | -0.05754100 |
| H | -3.07215700 | 1.22865000  | -0.89207300 |
| H | -3.78985100 | -0.24648100 | -0.21749000 |
| H | -3.24581900 | 1.04646900  | 0.87881800  |
| O | -1.51053700 | -0.82502100 | -1.26114600 |
| H | -0.58189300 | -1.11453900 | -1.28599600 |
| C | 2.17283200  | -0.43639000 | -0.06622000 |
| O | 3.17490600  | -1.00800100 | 0.28204700  |

|   |            |             |             |
|---|------------|-------------|-------------|
| O | 0.99387900 | -0.71995300 | -0.33341100 |
| O | 2.36220900 | 1.07518000  | -0.21937100 |
| H | 1.24364400 | 1.59797500  | 0.09242700  |
| H | 3.13713300 | 1.30815200  | 0.31351400  |

---

| Route 1 | CP1-2       | HF=-611.869792 |             |
|---------|-------------|----------------|-------------|
| C       | 0.54385700  | -2.20490800    | -0.17009600 |
| H       | 1.50878600  | -2.65448100    | -0.36701200 |
| C       | 0.46123300  | -0.88980500    | 0.02875500  |
| C       | 1.61222500  | 0.11071000     | 0.03070100  |
| C       | 1.75518400  | 0.76369500     | 1.40508800  |
| H       | 2.02975200  | 0.01489600     | 2.15238300  |
| H       | 2.53445200  | 1.52999300     | 1.36704800  |
| H       | 0.81692700  | 1.23225800     | 1.70860600  |
| C       | 2.93370800  | -0.50263500    | -0.42087600 |
| H       | 2.84677500  | -0.95438700    | -1.41476800 |
| H       | 3.69280500  | 0.28241300     | -0.46201900 |
| H       | 3.27434600  | -1.27422800    | 0.27446600  |
| O       | 1.27165200  | 1.19680300     | -0.86544300 |
| H       | 1.18760600  | 0.81871500     | -1.75075400 |
| C       | -1.97716100 | -0.63034900    | 0.07720300  |
| O       | -2.30164700 | -1.78207100    | -0.03706200 |
| O       | -0.69198600 | -0.17297400    | 0.27089000  |
| O       | -2.78723800 | 0.40876000     | 0.05244200  |
| H       | -0.33268800 | -2.83596900    | -0.13620100 |
| H       | -2.25112400 | 1.25356900     | 0.03071800  |
| O       | -1.18835800 | 2.52820700     | -0.15532000 |
| H       | -0.33799200 | 2.10102500     | -0.38638000 |
| H       | -1.36330400 | 3.17615900     | -0.84478300 |

---

| Route 1 | TS1-2       | HF=-611.8287978 |             |
|---------|-------------|-----------------|-------------|
| C       | -0.61644200 | 2.01516100      | -0.69627700 |
| H       | -1.56323700 | 2.53489600      | -0.62540100 |
| C       | -0.51678600 | 0.73338200      | -0.34344300 |

|   |             |             |             |
|---|-------------|-------------|-------------|
| C | -1.64625600 | -0.17342500 | 0.12848000  |
| C | -1.39884800 | -0.64315700 | 1.56211000  |
| H | -1.39691400 | 0.20776400  | 2.24806200  |
| H | -2.18649700 | -1.34095900 | 1.85933100  |
| H | -0.44018100 | -1.15935700 | 1.64398600  |
| C | -3.02092800 | 0.47859800  | 0.00669100  |
| H | -3.21172700 | 0.81842200  | -1.01714100 |
| H | -3.78483100 | -0.25586300 | 0.27498000  |
| H | -3.12118200 | 1.33918700  | 0.67367300  |
| O | -1.60725000 | -1.36831600 | -0.67375600 |
| H | -1.85131900 | -1.10714600 | -1.57116500 |
| C | 2.10488900  | 0.62840000  | 0.18063700  |
| O | 2.08564200  | 1.78488000  | 0.45954500  |
| O | 0.67802500  | 0.05289100  | -0.41235500 |
| O | 2.88148600  | -0.33879200 | 0.17041700  |
| H | 0.25195800  | 2.57724900  | -1.01269200 |
| H | 2.23262600  | -1.55938500 | -0.08463600 |
| O | 1.38549900  | -2.18319900 | -0.27917400 |
| H | 0.76264300  | -1.22656400 | -0.41362800 |
| H | 1.48765700  | -2.64171000 | -1.12198400 |

---

| Route 1 | CP1-3       | HF=-611.883187 |             |
|---------|-------------|----------------|-------------|
| C       | -0.49355700 | -2.22166000    | -0.16692100 |
| H       | -1.30258500 | -2.80632100    | 0.24766000  |
| C       | -0.58104300 | -0.89318600    | -0.31318100 |
| C       | -1.78702700 | -0.05775600    | 0.11037500  |
| C       | -2.34563600 | 0.73588700     | -1.07061100 |
| H       | -2.72457900 | 0.04985000     | -1.83232000 |
| H       | -3.16511800 | 1.37515200     | -0.73028300 |
| H       | -1.58359700 | 1.36948500     | -1.52923200 |
| C       | -2.89377800 | -0.87748600    | 0.76725100  |
| H       | -2.51969500 | -1.43155800    | 1.63439500  |
| H       | -3.68233800 | -0.20038300    | 1.10560200  |
| H       | -3.32815900 | -1.59533200    | 0.06681400  |

|   |             |             |             |
|---|-------------|-------------|-------------|
| O | -1.33918900 | 0.94008600  | 1.06881100  |
| H | -0.97786100 | 0.45878500  | 1.82455500  |
| C | 3.13884000  | -0.25041600 | 0.23154600  |
| O | 3.42598000  | -1.29829800 | -0.18655000 |
| O | 0.44804100  | -0.21641500 | -0.88286200 |
| O | 2.89700600  | 0.80487900  | 0.67700000  |
| H | 0.39781400  | -2.74381000 | -0.49642200 |
| H | 1.32157000  | 2.44809400  | 0.09859000  |
| O | 0.46241100  | 2.45510000  | -0.34071900 |
| H | 0.36758800  | 0.76141000  | -0.77808700 |
| H | -0.18383900 | 2.21951800  | 0.35253100  |

| Route 1 | TS1-3 | HF=-423.2656739 |  |
|---------|-------|-----------------|--|
|---------|-------|-----------------|--|

|   |             |             |             |
|---|-------------|-------------|-------------|
| C | -1.08056500 | 1.34032900  | -0.23851200 |
| H | -0.56533500 | 2.20567500  | 0.16256100  |
| C | -0.36060000 | 0.12934200  | -0.32225100 |
| C | 1.11244600  | 0.00763600  | 0.08128800  |
| C | 1.21484900  | -0.78733200 | 1.38344400  |
| H | 0.74045100  | -1.76399300 | 1.26804400  |
| H | 2.26698700  | -0.92425300 | 1.64794100  |
| H | 0.72577100  | -0.24232700 | 2.19586700  |
| C | 1.86888500  | -0.69252900 | -1.05557600 |
| H | 1.81775900  | -0.10218300 | -1.97802400 |
| H | 2.92009800  | -0.80224600 | -0.77494700 |
| H | 1.44027300  | -1.67510300 | -1.26266900 |
| O | 1.68516500  | 1.27647500  | 0.35649200  |
| H | 1.64705700  | 1.79453000  | -0.45716700 |
| O | -0.94660200 | -0.97151300 | -0.62777000 |
| H | -1.75562800 | 1.55306000  | -1.06953900 |
| O | -3.02262700 | -0.22020100 | 0.26803200  |
| H | -3.13302800 | -0.63514600 | 1.13328300  |
| H | -2.12946300 | -0.76550800 | -0.28311000 |
| H | -2.23252100 | 0.69474000  | 0.35336500  |

| Route 1 | CP1-4       | HF=-423.3326674 |             |
|---------|-------------|-----------------|-------------|
| C       | -0.89737600 | 1.45256400      | -0.08451800 |
| H       | -0.44475700 | 2.08017100      | 0.68820900  |
| C       | -0.28986800 | 0.07684800      | -0.07160300 |
| C       | 1.24637700  | -0.04556600     | 0.00891200  |
| C       | 1.59153700  | -0.46919600     | 1.43908100  |
| H       | 1.10837100  | -1.41778000     | 1.68272500  |
| H       | 2.67577800  | -0.57731200     | 1.53061000  |
| H       | 1.26475800  | 0.29084800      | 2.15500700  |
| C       | 1.73609500  | -1.07512800     | -1.00998100 |
| H       | 1.53285000  | -0.74047100     | -2.03478400 |
| H       | 2.81442000  | -1.22022800     | -0.90129400 |
| H       | 1.22312000  | -2.02804200     | -0.86726900 |
| O       | 1.87732100  | 1.21382200      | -0.18504500 |
| H       | 1.88254300  | 1.40404000      | -1.13050600 |
| O       | -0.96707000 | -0.94048600     | -0.09677000 |
| H       | -0.67388300 | 1.94354100      | -1.03940300 |
| O       | -3.76453300 | -0.23316400     | -0.03670300 |
| H       | -4.00166200 | -0.42560200     | 0.87604700  |
| H       | -2.88800600 | -0.64264200     | -0.13650800 |
| H       | -1.97985700 | 1.37496700      | 0.03396200  |

| Route 2 | CP2-1       | HF=-346.834476 |             |
|---------|-------------|----------------|-------------|
| C       | -0.22079300 | 2.33505500     | 0.05918400  |
| H       | -0.55344500 | 3.34813800     | 0.08923300  |
| C       | 0.16212500  | 1.19008200     | 0.01590000  |
| C       | 0.66027500  | -0.19387200    | -0.00160000 |
| O       | -0.01839100 | -0.84363200    | -1.09413000 |
| H       | 0.22801200  | -1.77724900    | -1.05877600 |
| C       | 2.17079200  | -0.19793900    | -0.26733800 |
| H       | 2.70772800  | 0.33935100     | 0.51895500  |
| H       | 2.54072800  | -1.22928300    | -0.29015700 |
| H       | 2.38515300  | 0.27439700     | -1.22852300 |
| C       | 0.30917700  | -0.89327500    | 1.31813900  |

|   |             |             |             |
|---|-------------|-------------|-------------|
| H | -0.77744700 | -0.92608900 | 1.42973000  |
| H | 0.70190300  | -1.91730500 | 1.30977900  |
| H | 0.75024100  | -0.36877000 | 2.16982200  |
| O | -2.71491800 | -0.52225800 | -0.05249000 |
| H | -1.93635300 | -0.68471500 | -0.60913200 |
| H | -2.66950800 | 0.42835100  | 0.09631600  |

---

| Route 2 | TS2-1       | HF=-346.7497618 |             |
|---------|-------------|-----------------|-------------|
| C       | 1.74575600  | 1.30778100      | 0.15113600  |
| H       | 1.56528400  | 2.37646700      | 0.22399400  |
| C       | 0.80925300  | 0.41362900      | 0.07969400  |
| C       | -0.62213200 | 0.00037900      | -0.01422400 |
| O       | -0.69554900 | -0.83614300     | -1.18186300 |
| H       | -1.57729900 | -1.22754400     | -1.20109900 |
| C       | -1.06427100 | -0.79171200     | 1.22046300  |
| H       | -0.98430600 | -0.18171600     | 2.12423900  |
| H       | -2.11055800 | -1.10588300     | 1.11655000  |
| H       | -0.43905800 | -1.67877700     | 1.34155400  |
| C       | -1.47569600 | 1.25578400      | -0.21220400 |
| H       | -1.17254500 | 1.77467100      | -1.12417000 |
| H       | -2.53213000 | 0.97825600      | -0.29927700 |
| H       | -1.37356100 | 1.94049600      | 0.63426000  |
| O       | 1.72352900  | -0.97973500     | 0.01754500  |
| H       | 2.43480700  | -0.13805200     | 0.03350900  |
| H       | 1.60805800  | -1.32605900     | -0.88420200 |

---

| Route 2 | CP2-2       | HF=-346.8773937 |             |
|---------|-------------|-----------------|-------------|
| C       | 1.70899800  | 1.18275900      | 0.10786400  |
| H       | 1.25508000  | 2.16106700      | 0.18945900  |
| C       | 0.96906000  | 0.07864400      | -0.02200600 |
| C       | -0.55900400 | 0.03338300      | -0.02031800 |
| O       | -0.87248600 | -1.08887600     | -0.87094400 |
| H       | -1.75476500 | -1.39962000     | -0.63941300 |
| C       | -1.05348800 | -0.25883800     | 1.40166800  |

|   |             |             |             |
|---|-------------|-------------|-------------|
| H | -0.80978800 | 0.56843600  | 2.07279200  |
| H | -2.14280700 | -0.39487900 | 1.41278200  |
| H | -0.57993500 | -1.16524000 | 1.78923400  |
| C | -1.20287200 | 1.29144600  | -0.59166700 |
| H | -0.83700000 | 1.47924500  | -1.60338400 |
| H | -2.29072500 | 1.16818500  | -0.62946000 |
| H | -0.99168800 | 2.16726000  | 0.02753900  |
| O | 1.53983900  | -1.15186200 | -0.07760900 |
| H | 2.78970600  | 1.11258400  | 0.14836300  |
| H | 0.84693000  | -1.73549500 | -0.43273800 |

---

| Route 2 | TS2-2       | HF=-346.7877075 |             |
|---------|-------------|-----------------|-------------|
| C       | -0.88554100 | -0.06159400     | -0.04834500 |
| C       | 0.62355400  | -0.00940000     | -0.02281200 |
| O       | 1.09215600  | -1.16940500     | -0.68953300 |
| H       | 2.05479200  | -1.16214000     | -0.62955300 |
| C       | 1.12579700  | 1.25630300      | -0.72750600 |
| H       | 0.76603500  | 2.16428200      | -0.23766300 |
| H       | 2.22112100  | 1.27282600      | -0.70383100 |
| H       | 0.80679100  | 1.26511300      | -1.77302200 |
| C       | 1.05141100  | -0.03018200     | 1.45674100  |
| H       | 0.70668200  | -0.95331300     | 1.92916400  |
| H       | 2.14526800  | 0.00747500      | 1.52000200  |
| H       | 0.64909000  | 0.82575700      | 2.00491700  |
| O       | -1.50092500 | -1.18359700     | -0.16201500 |
| C       | -1.84872300 | 0.98056300      | 0.05544900  |
| H       | -2.42360300 | -0.33575500     | -0.31470400 |
| H       | -2.41326500 | 0.92316900      | 0.98960300  |
| H       | -1.64174400 | 2.00245600      | -0.25369000 |

---

| Route 2 | CP2-3       | HF=-346.8949671 |             |
|---------|-------------|-----------------|-------------|
| C       | -0.92374000 | 0.27736600      | -0.02478300 |
| C       | 0.59490600  | -0.00274400     | -0.01719600 |
| O       | 1.21392300  | 1.20851300      | -0.40397400 |

|   |             |             |             |
|---|-------------|-------------|-------------|
| H | 2.16630300  | 1.06824100  | -0.34572700 |
| C | 1.01350600  | -0.37252800 | 1.41573800  |
| H | 0.52177800  | -1.28032100 | 1.77752100  |
| H | 2.09496700  | -0.55203400 | 1.44791100  |
| H | 0.78117900  | 0.45147100  | 2.09567100  |
| C | 0.95398500  | -1.11884900 | -1.00726100 |
| H | 0.66012400  | -0.83662900 | -2.02237000 |
| H | 2.03854600  | -1.27941900 | -1.00164000 |
| H | 0.48222600  | -2.07249200 | -0.75404700 |
| O | -1.35414200 | 1.40586300  | -0.09788000 |
| C | -1.85884600 | -0.91415800 | 0.06766500  |
| H | -2.84239100 | -0.56415000 | 0.38409800  |
| H | -1.95972600 | -1.37488200 | -0.92203600 |
| H | -1.50011800 | -1.68931000 | 0.75047300  |

---

| Route 3 | CP3-1       | HF=-721.1086945 |             |
|---------|-------------|-----------------|-------------|
| C       | -1.89043700 | 0.73530300      | 0.04353400  |
| C       | -3.01896400 | -0.21745400     | -0.01938800 |
| C       | -3.52346300 | -0.51404000     | 1.39959300  |
| H       | -3.88001500 | 0.39446300      | 1.89197100  |
| H       | -4.35742200 | -1.22389500     | 1.35205100  |
| H       | -2.72404700 | -0.95171800     | 2.00219100  |
| C       | -4.13147200 | 0.36562300      | -0.90225100 |
| H       | -3.75597400 | 0.53955100      | -1.91293700 |
| H       | -4.96550800 | -0.34312100     | -0.95354300 |
| H       | -4.50967200 | 1.30759400      | -0.49584000 |
| O       | -2.47930200 | -1.39800000     | -0.61512900 |
| H       | -3.16258600 | -2.07947000     | -0.58691700 |
| O       | 1.51181000  | 3.06268300      | 0.20577500  |
| H       | 2.02186900  | 2.22645900      | 0.18152300  |
| H       | 1.76529000  | 3.50432100      | -0.61108900 |
| C       | -1.05289300 | 1.62724000      | 0.10819200  |
| H       | -0.28893600 | 2.40774100      | 0.16870200  |
| Ag      | 0.32280200  | -0.23817700     | -0.01194800 |

|   |            |             |             |
|---|------------|-------------|-------------|
| C | 3.00502500 | -0.58929900 | -0.04104100 |
| O | 2.74391500 | 0.62549900  | -0.24183900 |
| C | 4.45696500 | -1.02128500 | 0.01685200  |
| H | 4.99725000 | -0.61210400 | -0.84073000 |
| H | 4.91650300 | -0.60258200 | 0.91798000  |
| H | 4.54887600 | -2.10745400 | 0.03752700  |
| O | 2.11784200 | -1.48793000 | 0.12340800  |

---

|    | Route 3 | TS3-1       | HF=-721.0430991 |
|----|---------|-------------|-----------------|
| C  |         | -0.93039700 | 0.72215500      |
| H  |         | -1.01550200 | 1.80465200      |
| C  |         | -1.99474300 | -0.06765600     |
| C  |         | -3.48490900 | 0.16856700      |
| O  |         | -3.91706800 | -0.76771400     |
| H  |         | -4.87554700 | -0.85405400     |
| C  |         | -4.12899500 | -0.18199800     |
| H  |         | -3.77732600 | 0.49161700      |
| H  |         | -5.21951800 | -0.08302700     |
| H  |         | -3.88497300 | -1.20759000     |
| C  |         | -3.81807100 | 1.59314300      |
| H  |         | -3.37303500 | 1.81054000      |
| H  |         | -4.90379900 | 1.71355500      |
| H  |         | -3.45260900 | 2.32222600      |
| O  |         | -1.68001500 | -1.44843200     |
| H  |         | -0.34761500 | -1.08104500     |
| H  |         | -2.19785200 | -1.88859100     |
| C  |         | 3.59964100  | 0.10184700      |
| O  |         | 2.95974100  | -1.00246600     |
| C  |         | 5.10898400  | 0.03746900      |
| H  |         | 5.45370300  | -0.59332400     |
| H  |         | 5.44848900  | -0.43207900     |
| H  |         | 5.54023100  | 1.03478700      |
| O  |         | 3.00761900  | 1.20787900      |
| Ag |         | 1.01136300  | -0.02538200     |

---

| Route 3 | CP3-2       | HF=-721.1505364 |             |
|---------|-------------|-----------------|-------------|
| C       | -1.90977300 | -0.74333000     | -0.16529000 |
| C       | -2.55146600 | 0.61289800      | 0.11912100  |
| O       | -1.95753700 | 1.48006600      | -0.84060000 |
| H       | -2.31684900 | 2.36495200      | -0.70462700 |
| C       | -4.06556900 | 0.50256500      | -0.12253300 |
| H       | -4.52985300 | -0.21699600     | 0.55909200  |
| H       | -4.53367600 | 1.47770100      | 0.05013700  |
| H       | -4.26117600 | 0.19590100      | -1.15119200 |
| C       | -2.26996100 | 1.11737800      | 1.53448900  |
| H       | -1.19539000 | 1.21304600      | 1.71624700  |
| H       | -2.71620700 | 2.11066400      | 1.65185700  |
| H       | -2.71011700 | 0.47132500      | 2.29969600  |
| O       | -2.19526000 | -1.16203000     | -1.41130200 |
| C       | -1.21749500 | -1.50430600     | 0.74309300  |
| H       | -1.79740900 | -2.02854000     | -1.56743300 |
| H       | -1.19247900 | -1.22468000     | 1.78978800  |
| H       | -0.96957400 | -2.53934800     | 0.51493700  |
| C       | 3.15736800  | 0.32500400      | -0.05978900 |
| O       | 2.28274200  | 0.93477400      | -0.75406300 |
| C       | 4.59931100  | 0.77100500      | -0.20528700 |
| H       | 4.94011800  | 0.55912500      | -1.22358100 |
| H       | 4.66781200  | 1.85282900      | -0.06212300 |
| H       | 5.24379200  | 0.25620000      | 0.50792300  |
| O       | 2.87915100  | -0.62475700     | 0.72209700  |
| Ag      | 0.61369700  | -0.34050800     | 0.06015700  |

| Route 3 | TS3-2      | HF=-721.0744051 |             |
|---------|------------|-----------------|-------------|
| C       | 2.12435700 | -0.32125900     | -0.03174100 |
| C       | 3.58182600 | 0.10647200      | 0.02585700  |
| O       | 4.34306800 | -1.07945200     | -0.01759100 |
| H       | 5.27230800 | -0.82876000     | 0.03998800  |
| C       | 3.90245600 | 1.00257000      | -1.18245100 |

|    |             |             |             |
|----|-------------|-------------|-------------|
| H  | 3.31600500  | 1.92499300  | -1.18116500 |
| H  | 4.96144500  | 1.28078800  | -1.14773000 |
| H  | 3.72322900  | 0.46374600  | -2.11687500 |
| C  | 3.81897400  | 0.85423000  | 1.35119800  |
| H  | 3.58388600  | 0.20856800  | 2.20155100  |
| H  | 4.87659000  | 1.13278200  | 1.41498700  |
| H  | 3.23000200  | 1.77218400  | 1.42185700  |
| O  | 1.80159900  | -1.51186900 | -0.03545500 |
| C  | 0.98594900  | 0.64285200  | -0.08736400 |
| H  | 0.45770300  | -0.97199900 | -0.06387700 |
| H  | 0.99751300  | 1.35936500  | 0.74147300  |
| H  | 1.00011700  | 1.21522600  | -1.02269400 |
| C  | -3.63672000 | 0.13396100  | 0.03264900  |
| O  | -3.06299700 | -1.00580800 | 0.02191100  |
| C  | -5.14778300 | 0.15847500  | 0.07234500  |
| H  | -5.54491700 | -0.39033200 | -0.78646800 |
| H  | -5.49698400 | -0.35676100 | 0.97201000  |
| H  | -5.52120900 | 1.18277200  | 0.06398900  |
| O  | -2.98617900 | 1.21423700  | 0.01269700  |
| Ag | -1.05093600 | -0.09347300 | -0.03133000 |

---

| Route 3 | CP3-3       | HF=-721.1612217 |             |
|---------|-------------|-----------------|-------------|
| C       | -1.82553800 | 0.21904900      | -0.15829100 |
| C       | -3.33581500 | 0.19010900      | 0.09735300  |
| O       | -3.68240100 | -1.16646100     | 0.26578600  |
| H       | -4.62058200 | -1.19786600     | 0.48498900  |
| C       | -3.61837300 | 0.97677400      | 1.39126600  |
| H       | -3.32169800 | 2.02672800      | 1.32399800  |
| H       | -4.69491000 | 0.95204300      | 1.59507300  |
| H       | -3.09861600 | 0.51411500      | 2.23451000  |
| C       | -4.08818100 | 0.79071400      | -1.10054000 |
| H       | -3.89215500 | 0.20736200      | -2.00451000 |
| H       | -5.16496800 | 0.75582600      | -0.90120600 |
| H       | -3.82243300 | 1.83473100      | -1.28574600 |

|    |             |             |             |
|----|-------------|-------------|-------------|
| O  | -1.17864900 | -0.81624600 | -0.02506000 |
| C  | -1.18043400 | 1.50804800  | -0.57986400 |
| H  | -0.14291500 | 1.56019700  | -0.22816600 |
| H  | -1.15344600 | 1.52476500  | -1.67739500 |
| H  | -1.73356300 | 2.39077600  | -0.25409500 |
| C  | 3.22756000  | 0.71940900  | 0.10100600  |
| O  | 3.18813800  | -0.55643600 | -0.05265000 |
| C  | 4.62045000  | 1.32300100  | 0.14474600  |
| H  | 5.19155500  | 0.86830300  | 0.95942700  |
| H  | 5.14948900  | 1.09225100  | -0.78464000 |
| H  | 4.57130100  | 2.40329100  | 0.28442300  |
| O  | 2.22180300  | 1.45082800  | 0.21150300  |
| Ag | 1.05412300  | -0.86358800 | -0.04930500 |

---

| Route 4 | CP4-1       | HF=-919.8852712 |             |
|---------|-------------|-----------------|-------------|
| C       | -2.29685000 | 2.46745300      | -1.05066600 |
| C       | -1.78030700 | 2.74858100      | 0.17687700  |
| C       | -1.03079800 | 0.76114300      | -0.43994500 |
| N       | -1.81915200 | 1.22610600      | -1.41437100 |
| H       | -2.95648200 | 3.03575200      | -1.68665300 |
| H       | -1.91024000 | 3.60517100      | 0.81871600  |
| N       | -0.99074300 | 1.67592000      | 0.53244800  |
| C       | -0.31030500 | 1.48533800      | 1.82122500  |
| H       | 0.16368900  | 2.43756200      | 2.07684200  |
| H       | 0.48482500  | 0.75964800      | 1.64357600  |
| C       | -1.27014000 | 1.00704000      | 2.90131000  |
| H       | -0.71549800 | 0.85785000      | 3.83242100  |
| H       | -2.05480400 | 1.74644000      | 3.09200100  |
| H       | -1.72583100 | 0.05729800      | 2.60167600  |
| C       | -2.13632400 | 0.49539300      | -2.64076800 |
| H       | -1.32552700 | 0.60985700      | -3.36404400 |
| H       | -2.28106700 | -0.55744600     | -2.36790100 |
| H       | -3.05575500 | 0.90813600      | -3.05726600 |
| C       | -2.66453900 | -1.95200900     | 0.19823300  |

|   |             |             |             |
|---|-------------|-------------|-------------|
| O | -1.96336200 | -1.69896100 | 1.22134000  |
| O | -2.23222200 | -2.05641800 | -0.98690800 |
| C | -4.15687500 | -2.19354700 | 0.42254200  |
| H | -4.73793700 | -1.91623400 | -0.46054100 |
| H | -4.31374400 | -3.26368800 | 0.59837200  |
| H | -4.51550400 | -1.65582800 | 1.30338900  |
| C | 3.24974200  | 0.87270800  | -0.32151800 |
| C | 3.94764500  | -0.41502800 | -0.10993100 |
| C | 3.55581000  | -1.02801000 | 1.23414600  |
| H | 2.49933100  | -1.30456200 | 1.22486700  |
| H | 4.15547800  | -1.92864400 | 1.39387000  |
| H | 3.75905800  | -0.32683600 | 2.04743300  |
| C | 3.61651000  | -1.37697000 | -1.25724400 |
| H | 3.88029500  | -0.93585000 | -2.22481200 |
| H | 4.19348300  | -2.29660200 | -1.12237400 |
| H | 2.55070500  | -1.61961200 | -1.25122400 |
| O | 5.35503900  | -0.17516400 | -0.03392300 |
| H | 5.62158500  | 0.22448100  | -0.87097500 |
| O | 0.34581200  | -1.85520600 | -0.09900200 |
| H | -0.30097700 | -1.87533200 | 0.65201800  |
| H | -0.28569600 | -2.17866100 | -0.77303300 |
| C | 2.72827300  | 1.94402500  | -0.53471500 |
| H | 2.28864200  | 2.89668300  | -0.72320500 |
| H | -0.50194300 | -0.20448600 | -0.41901500 |

---

|   | Route 4 | TS4-1      | HF=-919.8297654 |             |
|---|---------|------------|-----------------|-------------|
| C |         | 3.71777500 | -0.61460200     | -1.02028500 |
| C |         | 3.36891200 | -1.52029300     | -0.06585300 |
| C |         | 1.50989100 | -0.68018000     | -0.92439300 |
| N |         | 2.54723900 | -0.11292400     | -1.54766100 |
| H |         | 4.68695700 | -0.28771600     | -1.36173100 |
| H |         | 3.97726600 | -2.13601200     | 0.57651900  |
| N |         | 1.99054500 | -1.54784000     | -0.02977800 |
| C |         | 1.15265000 | -2.34777600     | 0.87551900  |

|   |             |             |             |
|---|-------------|-------------|-------------|
| H | 1.37999500  | -3.40249900 | 0.68778800  |
| H | 0.12094800  | -2.16059300 | 0.56777800  |
| C | 1.36297100  | -1.96909800 | 2.33395100  |
| H | 0.68957900  | -2.56542400 | 2.95654800  |
| H | 2.38693900  | -2.17563200 | 2.66269300  |
| H | 1.13774700  | -0.90753600 | 2.47700100  |
| C | 2.42726200  | 0.98127000  | -2.50727300 |
| H | 1.68464000  | 0.71741600  | -3.26156100 |
| H | 2.10288000  | 1.87042200  | -1.95714300 |
| H | 3.39425800  | 1.13026700  | -2.98830800 |
| C | 1.17836600  | 1.88127900  | 0.97400000  |
| O | 0.47403100  | 1.08470200  | 1.67293300  |
| O | 0.93366900  | 2.21737500  | -0.21435200 |
| C | 2.39819500  | 2.48204900  | 1.66739200  |
| H | 3.03568900  | 3.01767000  | 0.96124100  |
| H | 2.05756400  | 3.18299800  | 2.43657600  |
| H | 2.97102600  | 1.70331000  | 2.17929500  |
| C | -2.32612900 | -0.33805300 | -0.67871300 |
| C | -3.72738200 | -0.17470900 | -0.16352200 |
| C | -3.81166300 | -0.30086000 | 1.35567800  |
| H | -3.28154000 | 0.51997000  | 1.83985100  |
| H | -4.86295800 | -0.27857800 | 1.65817100  |
| H | -3.37943900 | -1.25198000 | 1.67676000  |
| C | -4.36935300 | 1.12946700  | -0.65005700 |
| H | -4.33516300 | 1.18797100  | -1.74375600 |
| H | -5.41709400 | 1.15191600  | -0.33478300 |
| H | -3.84544100 | 1.99565100  | -0.24376000 |
| O | -4.46256800 | -1.29193800 | -0.67444700 |
| H | -4.35073600 | -1.27804900 | -1.63340700 |
| O | -1.59365500 | 1.21523300  | 0.19749300  |
| H | -0.88278800 | 0.98852800  | 0.89968800  |
| H | -0.98102800 | 1.62181600  | -0.44842000 |
| C | -1.48616000 | -0.93746400 | -1.40797100 |
| H | -1.65947900 | -1.82069100 | -2.01014700 |

| H       | 0.42185300  | -0.54702600     | -1.13866600 |
|---------|-------------|-----------------|-------------|
| Route 4 | CP4-2       | HF=-919.9313511 |             |
| C       | 2.77180300  | -1.98862200     | -1.34267100 |
| C       | 2.70705800  | -2.37962600     | -0.04155900 |
| C       | 1.04079300  | -0.97252400     | -0.41127000 |
| N       | 1.71915800  | -1.12177900     | -1.55004000 |
| H       | 3.46215200  | -2.25596800     | -2.12663200 |
| H       | 3.32883700  | -3.05571800     | 0.52302900  |
| N       | 1.61553700  | -1.74120600     | 0.51641500  |
| C       | 1.21566700  | -1.76377600     | 1.92704400  |
| H       | 1.22838100  | -2.80637900     | 2.25936500  |
| H       | 0.18214700  | -1.39958400     | 1.95834600  |
| C       | 2.12341100  | -0.88343300     | 2.77486400  |
| H       | 1.75716800  | -0.86481200     | 3.80507000  |
| H       | 3.15305100  | -1.25414000     | 2.78573800  |
| H       | 2.12751300  | 0.13682600      | 2.38321100  |
| C       | 1.45002700  | -0.32815300     | -2.74052700 |
| H       | 0.44771200  | 0.08972000      | -2.64491800 |
| H       | 2.17076900  | 0.48963800      | -2.79752100 |
| H       | 1.51081200  | -0.96085100     | -3.62786000 |
| C       | 1.36311400  | 2.65548000      | 0.01069700  |
| O       | 0.07073300  | 2.79520200      | -0.04284000 |
| O       | 1.98267000  | 1.59987400      | -0.15166000 |
| C       | 2.08649200  | 3.95567900      | 0.30127000  |
| H       | 3.16421700  | 3.79349100      | 0.33336800  |
| H       | 1.84290500  | 4.69444100      | -0.46801500 |
| H       | 1.74207600  | 4.36524700      | 1.25550500  |
| C       | -1.99310600 | 0.31597500      | 0.40205900  |
| C       | -3.25322000 | -0.38833600     | -0.12105100 |
| C       | -4.20219900 | 0.65782400      | -0.70319800 |
| H       | -3.69074300 | 1.23128100      | -1.47981900 |
| H       | -5.08649400 | 0.17464400      | -1.13131100 |
| H       | -4.52461100 | 1.34162200      | 0.08626900  |

|   |             |             |             |
|---|-------------|-------------|-------------|
| C | -2.87085100 | -1.42376700 | -1.18690800 |
| H | -2.21350300 | -2.19145600 | -0.75876600 |
| H | -3.77199700 | -1.91990000 | -1.55975200 |
| H | -2.34533200 | -0.95089800 | -2.01911700 |
| O | -3.97348100 | -1.03502500 | 0.92587600  |
| H | -3.31989900 | -1.54512200 | 1.42140700  |
| O | -1.19063400 | 0.76063500  | -0.55316900 |
| H | -0.46926200 | 1.86073900  | -0.24609000 |
| H | 0.16302600  | -0.30672500 | -0.31359900 |
| C | -1.75685100 | 0.42445700  | 1.73472100  |
| H | -2.50908300 | 0.13467600  | 2.45829500  |
| H | -0.89983400 | 0.98756500  | 2.09270100  |

|   | Route 4 | TS4-2       | HF=-919.9179622 |             |
|---|---------|-------------|-----------------|-------------|
| C |         | 3.58321900  | -2.16423300     | -0.31725000 |
| C |         | 4.07664900  | -0.98473900     | 0.14678900  |
| C |         | 1.86816700  | -0.86605500     | 0.20704500  |
| N |         | 2.20984400  | -2.06981900     | -0.26835400 |
| H |         | 4.08520800  | -3.05143900     | -0.66897700 |
| H |         | 5.09272800  | -0.64899300     | 0.27811300  |
| N |         | 2.99416900  | -0.19225700     | 0.46898100  |
| C |         | 3.07534100  | 1.17443800      | 1.00471100  |
| H |         | 3.67169600  | 1.12660000      | 1.92139200  |
| H |         | 2.05583200  | 1.47994900      | 1.24107400  |
| C |         | 3.66383400  | 2.14559400      | -0.00613200 |
| H |         | 3.73184200  | 3.13657600      | 0.45077100  |
| H |         | 4.66816100  | 1.85527800      | -0.33103900 |
| H |         | 3.00514800  | 2.21927300      | -0.87362600 |
| C |         | 1.25363500  | -3.10348000     | -0.66321000 |
| H |         | 0.25972900  | -2.74587400     | -0.36383100 |
| H |         | 1.30328600  | -3.25238900     | -1.74413800 |
| H |         | 1.50332700  | -4.03404100     | -0.14931100 |
| C |         | -0.57088000 | 2.66966400      | -0.35312600 |
| O |         | 0.42709500  | 2.00991200      | -0.06258300 |

|   |             |             |             |
|---|-------------|-------------|-------------|
| O | -1.61397000 | 2.21171600  | -0.98897000 |
| C | -0.69502100 | 4.13697800  | 0.00668200  |
| H | -1.56695100 | 4.28685900  | 0.65024600  |
| H | 0.20394800  | 4.48321200  | 0.51778500  |
| H | -0.86014600 | 4.72819400  | -0.89871300 |
| C | -1.83461400 | -0.89882500 | -0.27219400 |
| C | -3.24251500 | -0.80462700 | 0.36592100  |
| C | -3.81420200 | -2.21711200 | 0.47492500  |
| H | -3.13951800 | -2.84772400 | 1.05893800  |
| H | -4.79582700 | -2.19059900 | 0.95891300  |
| H | -3.93282700 | -2.64998700 | -0.52284600 |
| C | -3.12879000 | -0.15209600 | 1.74793300  |
| H | -2.78470100 | 0.88406800  | 1.65099700  |
| H | -4.10656600 | -0.14456200 | 2.23978100  |
| H | -2.40628500 | -0.68984700 | 2.36485000  |
| O | -4.16264100 | -0.07538100 | -0.44130500 |
| H | -3.77355300 | 0.79725100  | -0.58726000 |
| O | -0.92119100 | -1.36207700 | 0.48031800  |
| C | -1.65596600 | -0.39931000 | -1.56928000 |
| H | -1.53289900 | 1.11893200  | -1.20580900 |
| H | -0.71141200 | -0.62300300 | -2.06451400 |
| H | -2.52816600 | -0.32948200 | -2.21419900 |
| H | 0.82236700  | -0.56426800 | 0.35045400  |

---

|   | Route 4 | CP4-3      | HF=-919.9531005 |             |
|---|---------|------------|-----------------|-------------|
| C |         | 3.42711800 | -2.19350900     | -0.16283200 |
| C |         | 3.86312800 | -1.11884900     | 0.54822700  |
| C |         | 1.81142300 | -0.68222400     | -0.15773500 |
| N |         | 2.14968500 | -1.90244500     | -0.59239500 |
| H |         | 3.90693600 | -3.13151700     | -0.39237800 |
| H |         | 4.79525700 | -0.94713500     | 1.06154900  |
| N |         | 2.84535100 | -0.18998100     | 0.53505200  |
| C |         | 2.86398800 | 1.14022200      | 1.16787100  |
| H |         | 2.95946600 | 0.98760400      | 2.24747800  |

|   |             |             |             |
|---|-------------|-------------|-------------|
| H | 1.88410500  | 1.58087200  | 0.94167900  |
| C | 3.98936900  | 2.00796300  | 0.62577000  |
| H | 3.95188900  | 2.98422900  | 1.11661300  |
| H | 4.98111900  | 1.58215800  | 0.80996900  |
| H | 3.87139800  | 2.16782500  | -0.44931900 |
| C | 1.31687800  | -2.76594700 | -1.42600200 |
| H | 0.26540300  | -2.54606800 | -1.21562900 |
| H | 1.55101900  | -2.59906700 | -2.48038000 |
| H | 1.52671800  | -3.80458000 | -1.16621100 |
| C | -0.59672400 | 2.39746500  | -0.67348400 |
| O | 0.16302700  | 1.54105300  | -0.11937800 |
| O | -1.81260400 | 2.25297100  | -0.93366400 |
| C | 0.04663600  | 3.73754500  | -1.03769000 |
| H | 0.30204700  | 4.27771000  | -0.11912200 |
| H | 0.97933300  | 3.57656000  | -1.58790300 |
| H | -0.63354600 | 4.35108800  | -1.63047300 |
| C | -2.22688100 | -1.14204200 | -0.32537000 |
| C | -2.98547600 | -0.43907600 | 0.81374500  |
| C | -4.09803900 | -1.39918100 | 1.25982000  |
| H | -3.68438700 | -2.33392100 | 1.64834700  |
| H | -4.68218200 | -0.90951000 | 2.04460600  |
| H | -4.77535500 | -1.62375700 | 0.42994800  |
| C | -2.03047800 | -0.13727200 | 1.97386700  |
| H | -1.24837100 | 0.54878600  | 1.63565700  |
| H | -2.59576900 | 0.33304100  | 2.78386300  |
| H | -1.55891100 | -1.05135200 | 2.34522900  |
| O | -3.62336300 | 0.72109400  | 0.34802200  |
| H | -2.93460600 | 1.31517200  | -0.04701700 |
| O | -1.31948800 | -1.93136000 | -0.08578400 |
| C | -2.65966500 | -0.82402200 | -1.72963200 |
| H | -2.28695400 | 0.17971700  | -1.96970900 |
| H | -2.25593500 | -1.55997000 | -2.42819900 |
| H | -3.74852900 | -0.76528200 | -1.80176300 |
| H | 0.87637500  | -0.12210600 | -0.30832400 |

---

| Route 5 | CP5-1       | HF=-1065.1065269 |             |
|---------|-------------|------------------|-------------|
| C       | 3.67913600  | -1.20436000      | -1.22466200 |
| C       | 3.64127800  | -1.76876000      | 0.01009400  |
| C       | 1.56436700  | -1.01600200      | -0.46023300 |
| N       | 2.40157500  | -0.75343700      | -1.49108200 |
| H       | 4.49182500  | -1.09317400      | -1.92552600 |
| H       | 4.41427500  | -2.24388800      | 0.59369800  |
| N       | 2.33880500  | -1.64626600      | 0.45515600  |
| C       | 1.89075900  | -1.98628800      | 1.80361700  |
| H       | 2.30479800  | -2.96744200      | 2.06082600  |
| H       | 0.80356400  | -2.08861300      | 1.74944000  |
| C       | 2.28544200  | -0.92236100      | 2.82150200  |
| H       | 1.87438800  | -1.17920100      | 3.80287700  |
| H       | 3.37384300  | -0.85779300      | 2.92079900  |
| H       | 1.90661400  | 0.06124600       | 2.52173800  |
| C       | 2.02100900  | 0.04139000       | -2.65280400 |
| H       | 1.11600700  | -0.37610200      | -3.09960900 |
| H       | 1.83799600  | 1.07261800       | -2.32949200 |
| H       | 2.82800400  | 0.00415700       | -3.38666500 |
| C       | 1.76192600  | 2.46550400       | 0.35698800  |
| O       | 1.17111400  | 2.11826800       | 1.42239200  |
| O       | 1.23252200  | 2.54367300       | -0.79268500 |
| C       | 3.24965100  | 2.78889000       | 0.46437300  |
| H       | 3.55668700  | 3.47285400       | -0.32978700 |
| H       | 3.48018100  | 3.21374700       | 1.44387900  |
| H       | 3.82727700  | 1.86289600       | 0.35911800  |
| Ag      | -0.46353500 | -0.32333800      | -0.24831800 |
| C       | -3.00045300 | -1.03893300      | -0.25971400 |
| C       | -4.07315800 | -0.07370100      | 0.10558500  |
| C       | -3.87498100 | 0.43038200       | 1.53418500  |
| H       | -2.94688100 | 1.00105100       | 1.60256000  |
| H       | -4.71649400 | 1.07940300       | 1.79163100  |
| H       | -3.85436800 | -0.40832100      | 2.23444900  |

|   |             |             |             |
|---|-------------|-------------|-------------|
| C | -4.10360700 | 1.08923400  | -0.89040500 |
| H | -4.22803800 | 0.72386400  | -1.91620500 |
| H | -4.95074200 | 1.73548000  | -0.64287500 |
| H | -3.17735000 | 1.66536700  | -0.82332900 |
| O | -5.30876400 | -0.78589000 | 0.10524700  |
| H | -5.51003800 | -1.01978700 | -0.80928200 |
| O | -1.08382500 | 1.85637500  | 0.19454800  |
| H | -0.42496700 | 1.95417300  | 0.94909400  |
| H | -0.44287400 | 2.23570800  | -0.47105800 |
| C | -2.25736000 | -1.95001800 | -0.59455400 |
| H | -1.75264800 | -2.84270600 | -0.89368800 |

---

|   | Route 5 | TS5-1      | HF=-1065.0770796 |
|---|---------|------------|------------------|
| C |         | 4.29613400 | 0.05850700       |
| C |         | 4.45480300 | -0.73424200      |
| C |         | 2.23654800 | -0.56737100      |
| N |         | 2.93626200 | 0.14956400       |
| H |         | 5.02330300 | 0.55283300       |
| H |         | 5.34623600 | -1.05584200      |
| N |         | 3.18538300 | -1.10843200      |
| C |         | 2.88157300 | -1.86154200      |
| H |         | 3.65861500 | -2.62364100      |
| H |         | 1.93469700 | -2.37690300      |
| C |         | 2.77659600 | -0.96003200      |
| H |         | 2.52301200 | -1.55927300      |
| H |         | 3.72680100 | -0.45352500      |
| H |         | 1.99804400 | -0.20389400      |
| C |         | 2.30911100 | 0.93589700       |
| H |         | 1.93097800 | 0.27999200       |
| H |         | 1.48924900 | 1.51415700       |
| H |         | 3.05277600 | 1.61301000       |
| C |         | 0.53059400 | 2.10892100       |
| O |         | 0.22094500 | 1.26920700       |
| O |         | 0.07487100 | 2.10460800       |

|    |             |             |             |
|----|-------------|-------------|-------------|
| C  | 1.54927600  | 3.18515800  | 1.08484400  |
| H  | 1.35585800  | 4.10222300  | 0.52388700  |
| H  | 1.54507400  | 3.38392800  | 2.15838500  |
| H  | 2.54964000  | 2.82987200  | 0.81055700  |
| Ag | 0.09653800  | -0.64171300 | -0.32236400 |
| C  | -2.95030600 | -0.68445900 | -0.17088700 |
| C  | -4.39369200 | -0.31469000 | -0.06586600 |
| C  | -4.83116500 | -0.09447900 | 1.37871200  |
| H  | -4.32721800 | 0.77839700  | 1.79292500  |
| H  | -5.91358100 | 0.06141600  | 1.39820500  |
| H  | -4.59532600 | -0.97500600 | 1.98121800  |
| C  | -4.77190700 | 0.86391700  | -0.96385400 |
| H  | -4.44878600 | 0.68687300  | -1.99600800 |
| H  | -5.86045100 | 0.97342100  | -0.95129500 |
| H  | -4.30806500 | 1.78431900  | -0.60965900 |
| O  | -5.06721100 | -1.50228500 | -0.49843800 |
| H  | -4.91268500 | -1.59117000 | -1.44761800 |
| O  | -2.32393400 | 1.32623100  | 0.56883500  |
| H  | -1.66410400 | 1.09582600  | 1.25776900  |
| H  | -1.68381000 | 1.64997600  | -0.10768100 |
| C  | -1.94739800 | -1.39377200 | -0.42162600 |
| H  | -1.88740600 | -2.42739300 | -0.73688500 |

---

|   | Route 5 | CP5-2      | HF=-1065.1267496 |             |
|---|---------|------------|------------------|-------------|
| C |         | 4.48968300 | 1.19973200       | 0.55787900  |
| C |         | 4.84566600 | 0.10332000       | -0.15843000 |
| C |         | 2.59336200 | 0.06259000       | 0.07813100  |
| N |         | 3.11515100 | 1.15661800       | 0.68695100  |
| H |         | 5.08681800 | 1.99949700       | 0.96784700  |
| H |         | 5.81269700 | -0.23588400      | -0.49620800 |
| N |         | 3.67487100 | -0.57236900      | -0.44329900 |
| C |         | 3.60992700 | -1.83913600      | -1.16706400 |
| H |         | 4.29341300 | -1.77334900      | -2.02028700 |
| H |         | 2.59349600 | -1.92078300      | -1.56038900 |

|    |             |             |             |
|----|-------------|-------------|-------------|
| C  | 3.94420500  | -3.03506400 | -0.28504600 |
| H  | 3.88292200  | -3.95773400 | -0.86972300 |
| H  | 4.95530400  | -2.96039800 | 0.12711300  |
| H  | 3.23630200  | -3.10736800 | 0.54533600  |
| C  | 2.33318300  | 2.13915100  | 1.42328400  |
| H  | 1.32058000  | 2.18176400  | 1.01964200  |
| H  | 2.29372800  | 1.87731100  | 2.48469900  |
| H  | 2.79958100  | 3.12104700  | 1.31478700  |
| C  | -1.55725500 | 3.12433000  | -0.41871700 |
| O  | -0.80040200 | 2.63005900  | 0.40758300  |
| O  | -2.71644000 | 2.58810300  | -0.76641400 |
| C  | -1.27311300 | 4.40919600  | -1.15061400 |
| H  | -2.09563000 | 5.11365500  | -0.99901400 |
| H  | -0.33810000 | 4.84262800  | -0.79749800 |
| H  | -1.20973800 | 4.21237600  | -2.22500600 |
| Ag | 0.56702600  | -0.61212200 | 0.00355900  |
| C  | -2.51680100 | -0.84659300 | 0.22637600  |
| C  | -3.90810000 | -1.46504700 | 0.11377000  |
| C  | -4.41897100 | -1.86801400 | 1.49881400  |
| H  | -4.46210400 | -0.99778500 | 2.15855200  |
| H  | -5.41988400 | -2.30483600 | 1.41881600  |
| H  | -3.74602600 | -2.61083300 | 1.93466900  |
| C  | -4.89111000 | -0.49365100 | -0.56021900 |
| H  | -4.52468300 | -0.19653000 | -1.54972400 |
| H  | -5.85559500 | -0.99399300 | -0.68889400 |
| H  | -5.04288000 | 0.41187800  | 0.03310900  |
| O  | -3.85220800 | -2.66850800 | -0.64154800 |
| H  | -3.34220600 | -2.46358400 | -1.43581800 |
| O  | -2.61106800 | 0.43836200  | 0.77327900  |
| H  | -1.70020400 | 0.73724100  | 0.95158900  |
| H  | -2.82833300 | 1.73549600  | -0.25268000 |
| C  | -1.34923300 | -1.40718600 | -0.10260100 |
| H  | -1.45755600 | -2.43572300 | -0.45031100 |

---

| Route 5 | TS5-2       | HF=-1065.0683143 |             |
|---------|-------------|------------------|-------------|
| C       | -4.01112600 | 2.08196800       | 0.43125000  |
| C       | -4.73533000 | 0.93862000       | 0.52964000  |
| C       | -2.57794900 | 0.35159100       | 0.19337500  |
| N       | -2.69892800 | 1.70144900       | 0.22600100  |
| H       | -4.31186600 | 3.11606500       | 0.49763600  |
| H       | -5.79021000 | 0.78338500       | 0.69524200  |
| N       | -3.84115100 | -0.10445300      | 0.38623900  |
| C       | -4.21517300 | -1.51654200      | 0.37319100  |
| H       | -4.96297300 | -1.67086300      | 1.15784900  |
| H       | -3.32152100 | -2.07982200      | 0.65385300  |
| C       | -4.73774500 | -1.97102000      | -0.98338100 |
| H       | -5.00292800 | -3.03158700      | -0.94380600 |
| H       | -5.62890000 | -1.40866700      | -1.27842700 |
| H       | -3.97336200 | -1.83649600      | -1.75375100 |
| C       | -1.59953500 | 2.64180400       | 0.06793000  |
| H       | -0.66099200 | 2.09832800       | -0.04394800 |
| H       | -1.75929400 | 3.25763500       | -0.82106600 |
| H       | -1.53317900 | 3.28692100       | 0.94792700  |
| C       | 2.88342100  | 2.92944900       | -0.21388800 |
| O       | 4.03881900  | 2.55695700       | -0.25573700 |
| O       | 1.82820100  | 2.14096300       | -0.41587200 |
| C       | 2.47480700  | 4.35574300       | 0.07750300  |
| H       | 1.83916900  | 4.39016000       | 0.96779000  |
| H       | 3.36270400  | 4.96697600       | 0.23642000  |
| H       | 1.89260900  | 4.75742700       | -0.75739900 |
| Ag      | -0.81840400 | -0.78789100      | -0.11101300 |
| C       | 2.17432400  | -1.36774100      | -0.31170800 |
| C       | 3.44927600  | -1.78851500      | 0.38539700  |
| C       | 4.47447800  | -2.25245300      | -0.65010500 |
| H       | 4.69180800  | -1.44571100      | -1.35301700 |
| H       | 5.39701100  | -2.55117300      | -0.14315900 |
| H       | 4.08595200  | -3.11300600      | -1.20141800 |
| C       | 3.99668900  | -0.61508800      | 1.21007900  |

|   |            |             |             |
|---|------------|-------------|-------------|
| H | 3.26979700 | -0.31313200 | 1.97365700  |
| H | 4.90975000 | -0.93743000 | 1.71956700  |
| H | 4.21918900 | 0.25580000  | 0.58822800  |
| O | 3.19758700 | -2.91166400 | 1.22294100  |
| H | 2.44325800 | -2.67443800 | 1.77722900  |
| O | 2.19002700 | -0.31608300 | -1.14192000 |
| H | 1.02194900 | -0.92621400 | -1.33040700 |
| H | 2.11853800 | 1.19999100  | -0.65851400 |
| C | 0.94091800 | -1.95990300 | -0.31659800 |
| H | 0.79961400 | -3.00111000 | -0.02997900 |

---

| Route 5 | CP5-3       | HF=-1065.1662775 |             |
|---------|-------------|------------------|-------------|
| C       | -3.20537300 | 2.64320200       | 0.75731000  |
| C       | -4.17262400 | 1.69817500       | 0.87361600  |
| C       | -2.28475100 | 0.65922100       | 0.19092700  |
| N       | -2.06327400 | 1.98857200       | 0.33907400  |
| H       | -3.23120200 | 3.70601000       | 0.94179800  |
| H       | -5.20511100 | 1.77951800       | 1.17641600  |
| N       | -3.58838100 | 0.49544800       | 0.52689300  |
| C       | -4.29730500 | -0.78086700      | 0.47078600  |
| H       | -4.91456700 | -0.86159600      | 1.37154200  |
| H       | -3.53483000 | -1.56220100      | 0.52136500  |
| C       | -5.14022100 | -0.92791400      | -0.78925800 |
| H       | -5.64640000 | -1.89764000      | -0.78647300 |
| H       | -5.90412600 | -0.14722900      | -0.85537700 |
| H       | -4.51134500 | -0.87129600      | -1.68214600 |
| C       | -0.79131400 | 2.65383500       | 0.09641200  |
| H       | -0.04464300 | 1.91728200       | -0.19878600 |
| H       | -0.89848200 | 3.38781600       | -0.70624300 |
| H       | -0.45300100 | 3.15626400       | 1.00615300  |
| C       | 3.69380500  | 2.41111700       | -0.19330900 |
| O       | 4.51896400  | 1.74622600       | 0.40117100  |
| O       | 2.66155400  | 1.90795100       | -0.86973200 |
| C       | 3.72575700  | 3.92091200       | -0.25985400 |

|    |             |             |             |
|----|-------------|-------------|-------------|
| H  | 2.76485900  | 4.33963200  | 0.05320300  |
| H  | 4.52420100  | 4.30078600  | 0.37689100  |
| H  | 3.89562800  | 4.23942400  | -1.29303500 |
| Ag | -0.87816100 | -0.81003000 | -0.45150500 |
| C  | 1.81801400  | -1.56031700 | -0.63063700 |
| C  | 2.34312400  | -2.05809300 | 0.73759700  |
| C  | 3.64634700  | -2.81533600 | 0.47973800  |
| H  | 4.36446200  | -2.15998900 | -0.01728400 |
| H  | 4.06568000  | -3.16112900 | 1.42938500  |
| H  | 3.45904800  | -3.68773600 | -0.15329300 |
| C  | 2.57687900  | -0.87397000 | 1.67871900  |
| H  | 1.63653800  | -0.33620400 | 1.86156300  |
| H  | 2.94419400  | -1.24597200 | 2.64009600  |
| H  | 3.30299100  | -0.16838500 | 1.26794700  |
| O  | 1.45881300  | -2.99865900 | 1.34045500  |
| H  | 0.60199600  | -2.56095800 | 1.42725200  |
| O  | 2.44917600  | -0.65068000 | -1.20714400 |
| H  | 0.54864800  | -2.05028100 | -2.25651200 |
| H  | 2.70871100  | 0.90391000  | -0.89591600 |
| C  | 0.62786000  | -2.16997400 | -1.17387000 |
| H  | 0.41268300  | -3.17540200 | -0.81666300 |

---

|   | Route 5 | TS5-3       | HF=-1065.1449686 |             |
|---|---------|-------------|------------------|-------------|
| C |         | -4.70518300 | -1.32853600      | -0.08445400 |
| C |         | -4.72463900 | 0.02830900       | -0.08499700 |
| C |         | -2.55896400 | -0.61226700      | -0.11524100 |
| N |         | -3.37457200 | -1.69885900      | -0.10141700 |
| H |         | -5.50990100 | -2.04732800      | -0.08135700 |
| H |         | -5.55167600 | 0.72136100       | -0.07766400 |
| N |         | -3.40821800 | 0.44404800       | -0.10814900 |
| C |         | -2.99257100 | 1.84795800       | -0.06710000 |
| H |         | -3.63996000 | 2.39887800       | -0.75774000 |
| H |         | -1.96594900 | 1.90010900       | -0.43987700 |
| C |         | -3.07056400 | 2.42946400       | 1.33854000  |

|    |             |             |             |
|----|-------------|-------------|-------------|
| H  | -2.75900500 | 3.47772300  | 1.31852800  |
| H  | -4.08522100 | 2.38362800  | 1.74772300  |
| H  | -2.39873000 | 1.89091100  | 2.01244200  |
| C  | -2.91465400 | -3.07582400 | -0.11694100 |
| H  | -1.82410000 | -3.06996200 | -0.10328900 |
| H  | -3.28384700 | -3.60882900 | 0.76347300  |
| H  | -3.26168800 | -3.58363800 | -1.02114200 |
| C  | 1.14778500  | 2.66815200  | -0.31107300 |
| O  | 0.18074100  | 1.89591700  | -0.41847000 |
| O  | 2.23330600  | 2.43081400  | 0.34472300  |
| C  | 1.11771300  | 4.03182500  | -0.97685300 |
| H  | 1.98767700  | 4.14192200  | -1.63063400 |
| H  | 0.20196100  | 4.16178800  | -1.55488400 |
| H  | 1.18974400  | 4.81357900  | -0.21446100 |
| Ag | -0.44108600 | -0.60355100 | -0.13574800 |
| C  | 2.51830300  | -0.73384300 | 0.49834800  |
| C  | 3.96518600  | -0.96592800 | 0.01391400  |
| C  | 4.33635000  | -2.42477200 | 0.27808300  |
| H  | 3.63598400  | -3.09028100 | -0.23153600 |
| H  | 5.35068900  | -2.61868200 | -0.08387300 |
| H  | 4.30795500  | -2.63158200 | 1.35186900  |
| C  | 4.05965900  | -0.62927400 | -1.47864400 |
| H  | 3.82256800  | 0.42782100  | -1.64537600 |
| H  | 5.07779800  | -0.81688500 | -1.83273700 |
| H  | 3.35285700  | -1.22678000 | -2.05761700 |
| O  | 4.90226000  | -0.18853500 | 0.74819400  |
| H  | 4.67549300  | 0.73959700  | 0.60716000  |
| O  | 1.61569700  | -1.26197800 | -0.22268800 |
| C  | 2.28889800  | 0.11612800  | 1.59502200  |
| H  | 2.22505500  | 1.36161800  | 0.89568900  |
| H  | 1.29373300  | 0.05784500  | 2.04073900  |
| H  | 3.10918900  | 0.24964000  | 2.29599600  |

---

Route 5 CP5-4

HF=-1065.1859296

---

---

|    |             |             |             |
|----|-------------|-------------|-------------|
| C  | 2.88796100  | -2.72607400 | -0.49279400 |
| C  | 3.68964700  | -2.15824700 | 0.44440400  |
| C  | 2.17776800  | -0.60692500 | -0.19259600 |
| N  | 1.97803800  | -1.76091900 | -0.87171600 |
| H  | 2.88208400  | -3.72198300 | -0.90748100 |
| H  | 4.52676900  | -2.55968600 | 0.99402000  |
| N  | 3.23664500  | -0.86484000 | 0.61508600  |
| C  | 3.85626700  | 0.11566300  | 1.50224400  |
| H  | 4.06885800  | -0.38144600 | 2.45434300  |
| H  | 3.10233500  | 0.88375000  | 1.69182300  |
| C  | 5.11700600  | 0.72906500  | 0.90720400  |
| H  | 5.54291300  | 1.45518000  | 1.60580400  |
| H  | 5.87664600  | -0.03201200 | 0.70423600  |
| H  | 4.88804600  | 1.24590200  | -0.02893100 |
| C  | 0.89376300  | -1.98375700 | -1.81990400 |
| H  | 0.02724100  | -2.42941300 | -1.32130400 |
| H  | 0.60339600  | -1.02079300 | -2.24153200 |
| H  | 1.24967400  | -2.63223300 | -2.62355500 |
| C  | -1.34505300 | 2.64416200  | -0.25142200 |
| O  | -0.11009200 | 2.95772100  | -0.29689500 |
| O  | -1.76019300 | 1.45801100  | -0.24857700 |
| C  | -2.34636200 | 3.78147900  | -0.19544700 |
| H  | -2.92921100 | 3.70350400  | 0.72752400  |
| H  | -1.85198800 | 4.75227000  | -0.23583600 |
| H  | -3.05082000 | 3.68852800  | -1.02719200 |
| Ag | 0.99016000  | 1.12031700  | -0.27182900 |
| C  | -2.73359700 | -1.68447600 | -0.31957000 |
| C  | -3.52180600 | -1.04827500 | 0.84357900  |
| C  | -4.70521600 | -1.97715300 | 1.14266900  |
| H  | -4.35976500 | -2.96413700 | 1.46208200  |
| H  | -5.30840200 | -1.53091700 | 1.93902300  |
| H  | -5.34442000 | -2.09026300 | 0.26150900  |
| C  | -2.61932800 | -0.90178900 | 2.07204800  |
| H  | -1.82382000 | -0.18075300 | 1.86241800  |

|   |             |             |             |
|---|-------------|-------------|-------------|
| H | -3.21119000 | -0.53136200 | 2.91440500  |
| H | -2.16140100 | -1.85683900 | 2.34026200  |
| O | -4.07265000 | 0.18964500  | 0.45490900  |
| H | -3.32057900 | 0.78228800  | 0.22987800  |
| O | -1.86558900 | -2.52054300 | -0.11747100 |
| C | -3.09386200 | -1.22750600 | -1.71141800 |
| H | -2.63627500 | -0.24448300 | -1.87165400 |
| H | -2.71334900 | -1.93845200 | -2.44765600 |
| H | -4.17194900 | -1.08691300 | -1.81949600 |

---

|   | Route 6 | CP6-1       | HF=-1032.0230194 |             |
|---|---------|-------------|------------------|-------------|
| C |         | 2.78316200  | -2.78084900      | 0.12069900  |
| C |         | 3.86134200  | -1.95190700      | 0.16674100  |
| C |         | 2.04547200  | -0.69416400      | -0.00411300 |
| N |         | 1.66603000  | -1.97884100      | 0.01239600  |
| H |         | 2.71516200  | -3.85632700      | 0.16241900  |
| H |         | 4.91435500  | -2.16795900      | 0.25342300  |
| N |         | 3.37995500  | -0.66259200      | 0.09110200  |
| C |         | 4.17943600  | 0.57254900       | 0.08709800  |
| H |         | 4.94299600  | 0.45792400       | 0.86241200  |
| H |         | 3.49218700  | 1.37900600       | 0.38607100  |
| C |         | 4.80634100  | 0.83808300       | -1.27384500 |
| H |         | 5.39502100  | 1.75824300       | -1.22317700 |
| H |         | 5.47032900  | 0.02763400       | -1.59280400 |
| H |         | 4.03476800  | 0.97635700       | -2.03636200 |
| C |         | 0.28357000  | -2.44943500      | -0.04273200 |
| H |         | 0.03466400  | -2.96361700      | 0.88727300  |
| H |         | -0.39270500 | -1.59760200      | -0.16692400 |
| H |         | 0.17073800  | -3.13563700      | -0.88506600 |
| C |         | 0.80670200  | 2.47882500       | 0.64232100  |
| O |         | 1.99861300  | 2.57079200       | 0.97795700  |
| O |         | 0.31798200  | 1.52562500       | -0.07310900 |
| C |         | -0.17478200 | 3.56312700       | 1.07211200  |
| H |         | -1.04975500 | 3.11555100       | 1.55365200  |

|   |             |             |             |
|---|-------------|-------------|-------------|
| H | 0.30246700  | 4.26955500  | 1.75279600  |
| H | -0.53358000 | 4.10238000  | 0.18877900  |
| C | -4.34170300 | -1.66169300 | -1.65412300 |
| H | -5.03866900 | -2.45418900 | -1.80509600 |
| C | -3.55778000 | -0.75880900 | -1.47665500 |
| C | -2.61048400 | 0.35584400  | -1.28877100 |
| O | -1.80345400 | 0.03230200  | -0.16343800 |
| C | -1.73649000 | 0.50517300  | -2.54596900 |
| H | -2.33909300 | 0.78092200  | -3.41629800 |
| H | -0.98470500 | 1.27923100  | -2.36613400 |
| H | -1.22431900 | -0.43576500 | -2.76529000 |
| C | -3.39167100 | 1.65185000  | -1.01749400 |
| H | -3.98081800 | 1.54428800  | -0.10442100 |
| H | -2.68357500 | 2.47582200  | -0.88541800 |
| H | -4.06190400 | 1.89435400  | -1.84750300 |
| C | -3.01896700 | -0.94300100 | 2.24153000  |
| O | -3.80193900 | -0.07898300 | 2.27759300  |
| O | -2.26021000 | -1.83138700 | 2.27033900  |
| H | -1.09197400 | 0.73300300  | -0.08076800 |
| H | 1.37371300  | 0.20650400  | -0.07158400 |

---

|   | Route 6 | TS6-1       | HF=-1032.0033105 |             |
|---|---------|-------------|------------------|-------------|
| C |         | -4.19049900 | 1.64379000       | -0.27055500 |
| C |         | -4.42913700 | 0.38058400       | -0.71771600 |
| C |         | -2.35166100 | 0.45251800       | 0.02632400  |
| N |         | -2.89031800 | 1.66784600       | 0.18633400  |
| H |         | -4.82598300 | 2.51403900       | -0.23333400 |
| H |         | -5.31481900 | -0.06089800      | -1.14595500 |
| N |         | -3.27543500 | -0.34331700      | -0.52232400 |
| C |         | -3.07164500 | -1.76694800      | -0.84770500 |
| H |         | -4.07019100 | -2.20717200      | -0.91221700 |
| H |         | -2.53492800 | -2.19506200      | 0.01017500  |
| C |         | -2.28640700 | -1.95007900      | -2.13674600 |
| H |         | -2.22564800 | -3.01760600      | -2.36692000 |

|   |             |             |             |
|---|-------------|-------------|-------------|
| H | -2.75685700 | -1.44280200 | -2.98506600 |
| H | -1.26670700 | -1.57968000 | -2.00715800 |
| C | -2.22404700 | 2.82772000  | 0.77404500  |
| H | -2.73573200 | 3.10764500  | 1.69752100  |
| H | -1.18367600 | 2.57094100  | 0.98901100  |
| H | -2.26116600 | 3.65895800  | 0.06685100  |
| C | -0.21871900 | -1.78588200 | 1.46973100  |
| O | -1.35307200 | -2.22668600 | 1.67308600  |
| O | 0.11565300  | -1.19214400 | 0.35463600  |
| C | 0.86162400  | -1.91079300 | 2.52702400  |
| H | 1.33325300  | -0.93983500 | 2.69951600  |
| H | 0.43544300  | -2.29878100 | 3.45230400  |
| H | 1.64411900  | -2.59213900 | 2.17749200  |
| C | 5.46140300  | 0.89125400  | -0.28624200 |
| H | 6.40285100  | 1.36416300  | -0.12415200 |
| C | 4.37481000  | 0.39286700  | -0.46010200 |
| C | 3.09582000  | -0.29563600 | -0.70508700 |
| O | 2.14870900  | 0.10319600  | 0.29236800  |
| C | 2.57805600  | 0.02340900  | -2.11540100 |
| H | 3.29607000  | -0.30668700 | -2.87180800 |
| H | 1.63173800  | -0.50255100 | -2.27933400 |
| H | 2.41995000  | 1.09702900  | -2.22295900 |
| C | 3.31623300  | -1.80922400 | -0.54250200 |
| H | 3.68924000  | -2.02735100 | 0.46084400  |
| H | 2.37093900  | -2.33811300 | -0.69526400 |
| H | 4.04724000  | -2.16794900 | -1.27223900 |
| C | 1.56644000  | 1.80055200  | 0.44321300  |
| O | 2.22057100  | 2.51464800  | -0.25192000 |
| O | 0.65532500  | 1.69502500  | 1.22745400  |
| H | 1.20825600  | -0.55773600 | 0.33261800  |
| H | -1.33422600 | 0.13278500  | 0.26733900  |

---



---

Route 6

CP6-2

HF=-1032.0188827

C

-3.84539700

-1.94384700

0.20467300

|   |             |             |             |
|---|-------------|-------------|-------------|
| C | -4.10335200 | -0.66609600 | 0.59723900  |
| C | -2.19814400 | -0.66031200 | -0.52692200 |
| N | -2.65502200 | -1.91711000 | -0.48921700 |
| H | -4.39889100 | -2.85614600 | 0.36025700  |
| H | -4.92245500 | -0.25446900 | 1.16496900  |
| N | -3.06839600 | 0.11527000  | 0.12891600  |
| C | -2.89643400 | 1.55622800  | 0.37763600  |
| H | -3.84635700 | 2.03937000  | 0.13006200  |
| H | -2.14203400 | 1.92285400  | -0.31868600 |
| C | -2.46807900 | 1.85280500  | 1.80536800  |
| H | -2.30262600 | 2.92836200  | 1.89500900  |
| H | -3.22259700 | 1.54143700  | 2.53493400  |
| H | -1.51760000 | 1.36343300  | 2.02740900  |
| C | -1.97179200 | -3.05765200 | -1.09778500 |
| H | -2.40575200 | -3.26989200 | -2.07798500 |
| H | -0.90552200 | -2.80787200 | -1.17985400 |
| H | -2.09446100 | -3.92470600 | -0.44674300 |
| C | 0.43142500  | 3.03181800  | -0.33820100 |
| O | -0.51678100 | 3.76736700  | -0.14328000 |
| O | 0.72896900  | 2.07116700  | 0.54755100  |
| C | 1.32856000  | 3.11615800  | -1.54725700 |
| H | 1.25976300  | 2.16794900  | -2.09087000 |
| H | 1.01585000  | 3.94765900  | -2.17810400 |
| H | 2.37068800  | 3.25366900  | -1.24221100 |
| H | 1.35167300  | 1.41042700  | 0.16380200  |
| H | -1.25285000 | -0.33757800 | -1.02182700 |
| C | 2.54210900  | -1.38707000 | 1.54994100  |
| C | 3.15683000  | -0.78925000 | 0.35178500  |
| O | 2.18270000  | -0.07222500 | -0.43896800 |
| C | 4.14372100  | 0.29801300  | 0.79622800  |
| H | 4.93865600  | -0.13910200 | 1.40556500  |
| H | 4.58782600  | 0.76890700  | -0.08549800 |
| H | 3.63258800  | 1.06144600  | 1.38818600  |
| C | 3.86844700  | -1.84796000 | -0.49650600 |

|   |            |             |             |
|---|------------|-------------|-------------|
| H | 3.15848700 | -2.60995100 | -0.81505300 |
| H | 4.30592900 | -1.36500000 | -1.37584900 |
| H | 4.66949000 | -2.31478700 | 0.08392200  |
| C | 1.05153000 | -0.75200600 | -0.97693700 |
| O | 0.92283300 | -1.95950400 | -0.74736500 |
| O | 0.31232800 | 0.04608400  | -1.60014200 |
| C | 2.12852700 | -1.83257100 | 2.59457800  |
| H | 1.73602500 | -2.24579300 | 3.49526500  |

---

|   | Route 6 | TS6-2       | HF=-1031.9738842 |             |
|---|---------|-------------|------------------|-------------|
| C |         | -3.89335700 | -0.32201100      | 0.52307900  |
| C |         | -3.52424300 | 0.97187600       | 0.73908800  |
| C |         | -2.17865400 | 0.11520900       | -0.78264400 |
| N |         | -3.04598600 | -0.83677700      | -0.43135900 |
| H |         | -4.67268600 | -0.91694400      | 0.97132000  |
| H |         | -3.92917500 | 1.71674100       | 1.40379600  |
| N |         | -2.44914700 | 1.22324800       | -0.08296800 |
| C |         | -1.67134100 | 2.47285500       | -0.17448700 |
| H |         | -2.23738500 | 3.17881000       | -0.79096200 |
| H |         | -0.75269000 | 2.21335800       | -0.70363100 |
| C |         | -1.35146200 | 3.05634600       | 1.19103400  |
| H |         | -0.63112300 | 3.86705000       | 1.05986200  |
| H |         | -2.24127800 | 3.44747200       | 1.69424600  |
| H |         | -0.87002500 | 2.30898200       | 1.82500000  |
| C |         | -2.97307000 | -2.24006300      | -0.83743800 |
| H |         | -3.97753300 | -2.66308800      | -0.78605000 |
| H |         | -2.59917600 | -2.29217000      | -1.85891500 |
| H |         | -2.25685900 | -2.75953500      | -0.15970900 |
| C |         | 2.16458100  | 2.78691700       | 0.04105900  |
| O |         | 1.75223600  | 3.91322100       | 0.21171900  |
| O |         | 1.70531200  | 1.77864100       | 0.80693100  |
| C |         | 3.18288500  | 2.40362300       | -1.00419300 |
| H |         | 2.72356500  | 1.69466000       | -1.70098700 |
| H |         | 3.51392100  | 3.29599100       | -1.53404700 |

|   |             |             |             |
|---|-------------|-------------|-------------|
| H | 4.04288400  | 1.90892100  | -0.54130100 |
| H | 1.99260500  | 0.90854100  | 0.46410700  |
| H | -1.35320300 | 0.01483800  | -1.48004500 |
| C | 0.45988700  | -2.55711700 | 0.50152300  |
| C | 1.89521600  | -2.12676100 | 0.50367000  |
| O | 1.93130000  | -0.84732000 | -0.20751300 |
| C | 2.39773400  | -1.87209100 | 1.91777600  |
| H | 2.33963200  | -2.79667800 | 2.49722400  |
| H | 3.43912600  | -1.53592600 | 1.90316600  |
| H | 1.78231700  | -1.11701700 | 2.41224100  |
| C | 2.79083200  | -3.10089700 | -0.26165800 |
| H | 2.40064400  | -3.26013000 | -1.26965800 |
| H | 3.81126000  | -2.71065900 | -0.32990300 |
| H | 2.81371300  | -4.06557600 | 0.25249500  |
| C | 0.86959300  | -0.76455200 | -1.07688500 |
| O | 0.09451700  | -1.78573400 | -1.02564100 |
| O | 0.72731700  | 0.25152200  | -1.75422200 |
| C | -0.52004900 | -3.15343900 | 1.05382400  |
| H | -0.44936200 | -3.64493600 | 2.01935200  |

---

|   | Route 6 | CP6-3       | HF=-1032.0205792 |             |
|---|---------|-------------|------------------|-------------|
| C |         | -3.89932400 | 0.64813500       | -1.50090800 |
| C |         | -3.34853100 | 1.78959800       | -1.06760200 |
| C |         | -2.35168900 | 0.08645600       | 0.09953600  |
| N |         | -3.53586200 | -0.40221100      | -0.62114200 |
| H |         | -4.62742800 | 0.48893800       | -2.28260000 |
| H |         | -3.50956000 | 2.80173800       | -1.40966400 |
| N |         | -2.59384400 | 1.53449100       | 0.09501100  |
| C |         | -1.56625900 | 2.45058000       | 0.56148000  |
| H |         | -1.70205800 | 3.39503000       | 0.02411800  |
| H |         | -0.55895200 | 2.09129100       | 0.30042600  |
| C |         | -1.65693700 | 2.70965800       | 2.06238000  |
| H |         | -0.86771900 | 3.39772300       | 2.38202900  |
| H |         | -2.62770700 | 3.14192200       | 2.32100800  |

|   |             |             |             |
|---|-------------|-------------|-------------|
| H | -1.54227600 | 1.78559300  | 2.63791100  |
| C | -3.52988500 | -1.76494100 | -1.10004300 |
| H | -2.72337600 | -1.99250000 | -1.81635900 |
| H | -3.44019600 | -2.45542500 | -0.25505100 |
| H | -4.48816100 | -1.96867200 | -1.58625300 |
| C | 3.72906800  | 1.72913400  | -0.34285000 |
| O | 4.17934600  | 2.49166700  | 0.47164400  |
| O | 2.41674500  | 1.37272100  | -0.28006000 |
| C | 4.50889200  | 1.10742900  | -1.47788600 |
| H | 4.11042500  | 1.44714300  | -2.44043700 |
| H | 5.55365400  | 1.40516300  | -1.40007300 |
| H | 4.43018400  | 0.01549000  | -1.45086200 |
| C | -1.05550300 | -0.25107100 | -0.62896100 |
| H | -0.98018500 | 0.16243200  | -1.63293200 |
| C | -0.01588000 | -0.95499500 | -0.19066400 |
| C | 0.29708300  | -1.68702900 | 1.10779400  |
| O | 1.58047300  | -2.30259800 | 0.79464100  |
| C | 0.52817300  | -0.73997500 | 2.28066200  |
| H | -0.41550900 | -0.28251500 | 2.58757500  |
| H | 0.93588500  | -1.29772700 | 3.12824600  |
| H | 1.22661000  | 0.05328300  | 2.00387300  |
| C | -0.66833300 | -2.81767300 | 1.43737700  |
| H | -0.78502300 | -3.49076900 | 0.58483600  |
| H | -0.28553400 | -3.38898100 | 2.28734200  |
| H | -1.64911700 | -2.41769300 | 1.70483200  |
| C | 2.03382900  | -1.90047800 | -0.39394900 |
| O | 1.10231000  | -1.10343200 | -1.00824100 |
| O | 3.09226900  | -2.16806100 | -0.88143400 |
| H | 2.19477600  | 0.73979700  | -0.97900800 |
| H | -2.33816200 | -0.30855500 | 1.12338200  |

---

|  | Route 6 | TS6-3       | HF=-1031.9865576 |             |
|--|---------|-------------|------------------|-------------|
|  | C       | -1.07107100 | -3.44744500      | -0.40239900 |
|  | C       | -2.15969000 | -2.82991700      | -0.91220300 |

|   |             |             |             |
|---|-------------|-------------|-------------|
| C | -1.15435500 | -1.37561400 | 0.47290600  |
| N | -0.51464500 | -2.59007900 | 0.53657800  |
| H | -0.64718000 | -4.41676900 | -0.60930000 |
| H | -2.87504600 | -3.16250800 | -1.64728300 |
| N | -2.27331400 | -1.59454000 | -0.29366200 |
| C | -3.28218600 | -0.59363300 | -0.60920900 |
| H | -3.94996100 | -1.05379000 | -1.34279900 |
| H | -2.78470500 | 0.24886000  | -1.10234700 |
| C | -4.06827800 | -0.12045300 | 0.60549800  |
| H | -4.84319000 | 0.58148700  | 0.28531500  |
| H | -4.54881300 | -0.96147600 | 1.11389900  |
| H | -3.42508300 | 0.41542300  | 1.30677600  |
| C | 0.70800600  | -2.82750000 | 1.26303700  |
| H | 1.53411700  | -2.26593300 | 0.81208400  |
| H | 0.59501600  | -2.52447500 | 2.30703300  |
| H | 0.93589100  | -3.89368500 | 1.23519700  |
| C | -1.89025700 | 2.76086400  | -0.07625800 |
| O | -2.71578300 | 3.46670700  | 0.45975600  |
| O | -1.34460500 | 1.72052200  | 0.56816200  |
| C | -1.38470800 | 3.02053000  | -1.48354200 |
| H | -1.09720000 | 2.10454300  | -2.00644300 |
| H | -2.14777600 | 3.56127100  | -2.04453700 |
| H | -0.49433900 | 3.65596600  | -1.42691200 |
| C | 0.14519000  | -0.18849700 | -0.68561000 |
| H | 0.01560500  | -0.73284500 | -1.62681300 |
| C | 1.43655700  | 0.06593600  | -0.43023000 |
| C | 2.12683800  | 0.90154400  | 0.63733700  |
| O | 3.50423100  | 0.45070500  | 0.52363900  |
| C | 2.10167600  | 2.38911400  | 0.27907800  |
| H | 1.08876500  | 2.77725100  | 0.40101100  |
| H | 2.77690200  | 2.93972200  | 0.94051500  |
| H | 2.42045300  | 2.54487600  | -0.75532500 |
| C | 1.65626100  | 0.67018200  | 2.06182800  |
| H | 1.78578100  | -0.37330200 | 2.35527200  |

|   |             |             |             |
|---|-------------|-------------|-------------|
| H | 2.23298300  | 1.29251300  | 2.75179300  |
| H | 0.60316800  | 0.95066300  | 2.14860600  |
| C | 3.68053600  | -0.18074700 | -0.65418800 |
| O | 2.48165900  | -0.36267100 | -1.27305000 |
| O | 4.73073300  | -0.55212100 | -1.09039300 |
| H | -0.78386100 | 1.07319800  | -0.02877100 |
| H | -1.19281900 | -0.71997000 | 1.33143500  |

---

|   | Route 6 | CP6-4       | HF=-1032.0501833 |
|---|---------|-------------|------------------|
| C |         | -3.19063300 | -2.81899600      |
| C |         | -4.18396800 | -2.04508800      |
| C |         | -2.43341800 | -0.73355200      |
| N |         | -2.11356600 | -1.98400900      |
| H |         | -3.16054700 | -3.87235400      |
| H |         | -5.18671200 | -2.29809700      |
| N |         | -3.69366500 | -0.75831500      |
| C |         | -4.41121400 | 0.41990700       |
| H |         | -5.40200000 | 0.41659600       |
| H |         | -3.84566800 | 1.29048800       |
| C |         | -4.50995700 | 0.40704500       |
| H |         | -5.05219000 | 1.29752700       |
| H |         | -5.04206200 | -0.47211400      |
| H |         | -3.51549100 | 0.43421200       |
| C |         | -0.82529600 | -2.37551200      |
| H |         | -0.95800400 | -2.74593400      |
| H |         | -0.16793300 | -1.50570300      |
| H |         | -0.37683000 | -3.15707400      |
| C |         | -1.31617500 | 2.43745900       |
| O |         | -2.54127500 | 2.53438500       |
| O |         | -0.62738300 | 1.36046800       |
| C |         | -0.54521200 | 3.69592200       |
| H |         | 0.18175500  | 3.47770500       |
| H |         | -1.22942000 | 4.48098900       |
| H |         | 0.01266300  | 4.06413200       |

|   |             |             |             |
|---|-------------|-------------|-------------|
| C | 2.07732500  | 0.02436500  | -1.73335800 |
| H | 2.28415400  | -0.43264700 | -2.69494400 |
| C | 2.90817900  | -0.15714600 | -0.71276000 |
| C | 2.85339800  | 0.40792500  | 0.69472800  |
| O | 4.04299500  | -0.18095000 | 1.28958700  |
| C | 2.99964300  | 1.92402500  | 0.71586500  |
| H | 2.11298100  | 2.37093400  | 0.25966600  |
| H | 3.08664900  | 2.27777200  | 1.74715000  |
| H | 3.88520200  | 2.23928400  | 0.15808800  |
| C | 1.63436600  | -0.05562400 | 1.47940100  |
| H | 1.56655700  | -1.14748200 | 1.47635200  |
| H | 1.70877300  | 0.28445500  | 2.51662400  |
| H | 0.73621800  | 0.37295200  | 1.02262800  |
| C | 4.70029400  | -0.94025000 | 0.39972400  |
| O | 4.04369500  | -0.93428300 | -0.80316500 |
| O | 5.70934100  | -1.54646200 | 0.60206700  |
| H | 1.19203800  | 0.64372900  | -1.59855400 |
| H | -1.74248600 | 0.16875700  | -0.36698200 |

---

| Route 6 | CP6-5       | HF=-1108.4880094 |             |
|---------|-------------|------------------|-------------|
| C       | -4.67335300 | -0.74919300      | 1.38459800  |
| H       | -4.60781300 | -1.57115900      | 2.08664800  |
| C       | -3.76442200 | -0.58620500      | 0.43246300  |
| C       | -3.65897700 | 0.46831700       | -0.65424600 |
| C       | -4.79196700 | 0.36966300       | -1.67002200 |
| H       | -5.73916700 | 0.64300400       | -1.19698400 |
| H       | -4.60794900 | 1.05405800       | -2.50270200 |
| H       | -4.88195200 | -0.64733700      | -2.06082900 |
| C       | -3.46202500 | 1.87528500       | -0.10931400 |
| H       | -2.57944500 | 1.88724100       | 0.53647300  |
| H       | -3.32555700 | 2.57829000       | -0.93623000 |
| H       | -4.34541500 | 2.17754600       | 0.46122700  |
| O       | -2.42990000 | 0.06383800       | -1.32172800 |
| H       | -5.49480000 | -0.04993900      | 1.47929100  |

|   |             |             |             |
|---|-------------|-------------|-------------|
| C | -1.91340600 | -1.01667100 | -0.74018800 |
| O | -0.90371200 | -1.57581000 | -1.08133300 |
| O | -2.70871200 | -1.45587800 | 0.26943200  |
| O | -0.83219100 | 0.78514800  | 1.40452000  |
| H | -0.78397500 | 1.08305700  | 2.31778300  |
| H | 0.02544600  | 1.11579300  | 0.98098200  |
| C | 4.33469900  | -1.02997100 | -0.62715300 |
| C | 3.81330100  | -1.93824300 | 0.24127000  |
| C | 2.14106700  | -0.90482300 | -0.75937800 |
| N | 3.27599300  | -0.41119400 | -1.25351300 |
| H | 5.35698800  | -0.77170600 | -0.85098800 |
| H | 4.29304200  | -2.63507500 | 0.90941500  |
| N | 2.44057700  | -1.85573300 | 0.13184200  |
| C | 1.46506900  | -2.61830600 | 0.92109500  |
| H | 1.89490600  | -3.61350500 | 1.06925700  |
| H | 0.56788400  | -2.71702800 | 0.30650900  |
| C | 1.13553100  | -1.93821700 | 2.24247000  |
| H | 0.46936600  | -2.58672000 | 2.81979100  |
| H | 2.03690200  | -1.75800700 | 2.83639300  |
| H | 0.61826400  | -0.99111800 | 2.06180000  |
| C | 3.36591200  | 0.74973000  | -2.13321300 |
| H | 4.27947800  | 0.66521500  | -2.72434500 |
| H | 2.50374600  | 0.75004100  | -2.80045700 |
| H | 3.35635100  | 1.65589600  | -1.49455700 |
| C | 2.03903000  | 2.53477800  | 0.51495700  |
| O | 3.08954900  | 2.89089100  | -0.05101200 |
| O | 1.39880400  | 1.45040000  | 0.28693000  |
| C | 1.46010000  | 3.44553200  | 1.60353000  |
| H | 1.65842400  | 3.00542400  | 2.58826900  |
| H | 1.92006800  | 4.43444700  | 1.56782900  |
| H | 0.37442800  | 3.53307400  | 1.49672000  |
| H | 1.14071900  | -0.61176500 | -1.03528500 |

---

Route 6 TS6-4

HF=-1108.4598511

---

---

|   |             |             |             |
|---|-------------|-------------|-------------|
| C | 4.88865700  | -1.12473200 | -0.97042200 |
| H | 4.92935300  | -1.83341000 | -1.78884100 |
| C | 3.74321500  | -0.85853200 | -0.34558400 |
| C | 3.48913800  | 0.09723800  | 0.81214300  |
| C | 4.23981900  | -0.31676000 | 2.07581600  |
| H | 5.31890800  | -0.21128900 | 1.93175100  |
| H | 3.93734700  | 0.31851000  | 2.91394500  |
| H | 4.02145700  | -1.35739200 | 2.32786100  |
| C | 3.75546900  | 1.55279500  | 0.43717700  |
| H | 3.16202100  | 1.81747300  | -0.43890400 |
| H | 3.48129100  | 2.20795900  | 1.26994500  |
| H | 4.81673800  | 1.69954200  | 0.21418000  |
| O | 2.08707700  | -0.09890800 | 1.06300800  |
| H | 5.80614000  | -0.63803400 | -0.66290000 |
| C | 1.52129400  | -0.82473100 | 0.04489200  |
| O | 0.46165400  | -1.42732600 | 0.20865400  |
| O | 2.56694000  | -1.46638700 | -0.65956600 |
| O | 1.23839800  | 0.51732700  | -1.14294300 |
| H | 1.15615700  | 0.03497000  | -1.97514700 |
| H | 0.11150800  | 1.01470200  | -0.86359900 |
| C | -4.38933600 | -0.26938800 | 1.03616000  |
| C | -4.25802800 | -1.39348800 | 0.28048000  |
| C | -2.23431400 | -0.69393600 | 0.83048200  |
| N | -3.11847900 | 0.14381600  | 1.37343300  |
| H | -5.26754900 | 0.26656200  | 1.35844000  |
| H | -5.00070400 | -2.03049400 | -0.17225200 |
| N | -2.90592600 | -1.64321300 | 0.17004800  |
| C | -2.27135900 | -2.69978800 | -0.62887400 |
| H | -2.76691800 | -3.64321900 | -0.38077000 |
| H | -1.22824000 | -2.74339600 | -0.30809100 |
| C | -2.34901300 | -2.39333700 | -2.11783200 |
| H | -1.85106100 | -3.18895300 | -2.67892000 |
| H | -3.38215500 | -2.32191100 | -2.47163300 |
| H | -1.83943600 | -1.45055400 | -2.33168000 |

|   |             |             |             |
|---|-------------|-------------|-------------|
| C | -2.77910300 | 1.39173500  | 2.05191500  |
| H | -3.54053100 | 1.59721600  | 2.80612000  |
| H | -1.81036900 | 1.27237100  | 2.53607700  |
| H | -2.71561800 | 2.19087900  | 1.29880000  |
| C | -1.23302700 | 2.63870400  | -0.87782000 |
| O | -2.20958100 | 3.22702500  | -0.41715800 |
| O | -0.91430400 | 1.42042400  | -0.52854000 |
| C | -0.35733300 | 3.29678700  | -1.93191600 |
| H | -0.67487900 | 2.95336000  | -2.92323700 |
| H | -0.47816500 | 4.37970900  | -1.89056800 |
| H | 0.69205200  | 3.01854500  | -1.80887000 |
| H | -1.14446100 | -0.65000600 | 0.86659000  |

---

|   | Route 6 | CP6-6      | HF=-1108.469948 |             |
|---|---------|------------|-----------------|-------------|
| C |         | 4.74974300 | -1.57757400     | -0.22139800 |
| H |         | 5.05094700 | -2.25109500     | -1.01485000 |
| C |         | 3.48242800 | -1.17444100     | -0.10288900 |
| C |         | 2.90394300 | -0.22503600     | 0.94163200  |
| C |         | 3.07997800 | -0.75280800     | 2.36384900  |
| H |         | 4.13871500 | -0.79105600     | 2.63563700  |
| H |         | 2.56567900 | -0.09677500     | 3.07420400  |
| H |         | 2.66184600 | -1.75873400     | 2.44888500  |
| C |         | 3.46361800 | 1.19088200      | 0.79217500  |
| H |         | 3.31193600 | 1.54428900      | -0.22936000 |
| H |         | 2.95658900 | 1.87067900      | 1.48506100  |
| H |         | 4.53546600 | 1.20670200      | 1.01213800  |
| O |         | 1.50629000 | -0.24658400     | 0.64056900  |
| H |         | 5.50107200 | -1.24393600     | 0.48428800  |
| C |         | 1.28499600 | -0.80847200     | -0.64655800 |
| O |         | 0.20252100 | -1.43177900     | -0.81382300 |
| O |         | 2.48685000 | -1.58516700     | -0.91567400 |
| O |         | 1.41985100 | 0.38697400      | -1.56414400 |
| H |         | 1.31224600 | 0.00043400      | -2.44395800 |
| H |         | 0.09194600 | 1.22104600      | -1.19743800 |

|   |             |             |             |
|---|-------------|-------------|-------------|
| C | -3.91655700 | 0.00737900  | 1.50582100  |
| C | -4.19516000 | -1.07280900 | 0.72482700  |
| C | -2.00891700 | -0.72931300 | 0.66688000  |
| N | -2.55118600 | 0.19858800  | 1.45686300  |
| H | -4.56415300 | 0.64579400  | 2.08519100  |
| H | -5.13121100 | -1.55881800 | 0.50021900  |
| N | -2.99204500 | -1.51697100 | 0.21846800  |
| C | -2.77411600 | -2.60777700 | -0.74166500 |
| H | -3.52645600 | -3.37377600 | -0.53339900 |
| H | -1.78281200 | -3.01404300 | -0.53071100 |
| C | -2.83176800 | -2.11554200 | -2.18004200 |
| H | -2.70784500 | -2.96451800 | -2.85842800 |
| H | -3.78529200 | -1.62901100 | -2.40684100 |
| H | -2.00998600 | -1.41725100 | -2.35342100 |
| C | -1.81134200 | 1.29445900  | 2.07576800  |
| H | -2.13544900 | 1.40344900  | 3.11268300  |
| H | -0.75117800 | 1.04665700  | 2.03930400  |
| H | -1.97695000 | 2.21299600  | 1.50415900  |
| C | -0.68153500 | 2.99296400  | -0.82156900 |
| O | -1.49642700 | 3.64691200  | -0.19656100 |
| O | -0.73378200 | 1.66369600  | -0.82170700 |
| C | 0.40778000  | 3.62042200  | -1.66363300 |
| H | 0.15102800  | 3.51448500  | -2.72340200 |
| H | 0.49021300  | 4.68026100  | -1.42447600 |
| H | 1.36497100  | 3.11575100  | -1.50905200 |
| H | -0.95967900 | -0.86126900 | 0.32776800  |

---

| Route 6 | TS6-5       | HF=-1108.4607283 |             |
|---------|-------------|------------------|-------------|
| C       | -2.83827800 | 1.65283400       | 1.22792400  |
| H       | -3.16046100 | 0.84850300       | 1.88166100  |
| C       | -1.54268800 | 1.76807200       | 0.86556100  |
| C       | -0.98077700 | 2.92629300       | 0.04095700  |
| C       | -1.94080800 | 3.53712900       | -0.96796500 |
| H       | -2.77682400 | 4.02514300       | -0.46013900 |

|   |             |             |             |
|---|-------------|-------------|-------------|
| H | -1.42267400 | 4.28903200  | -1.57059500 |
| H | -2.33499100 | 2.76717000  | -1.63449500 |
| C | -0.41084700 | 3.99921800  | 0.97822100  |
| H | 0.20757300  | 3.54379600  | 1.75924500  |
| H | 0.18843200  | 4.72039600  | 0.41312600  |
| H | -1.22014300 | 4.53368100  | 1.48365200  |
| O | 0.08863600  | 2.34162100  | -0.73196800 |
| H | -3.57427400 | 2.39574600  | 0.94636200  |
| C | 0.69852400  | 1.19575600  | -0.24931900 |
| O | 0.72663200  | 0.16659300  | -0.91488300 |
| O | -0.56674800 | 0.93902600  | 1.17366900  |
| O | 1.81925900  | 1.47438900  | 0.51600000  |
| H | 1.73498300  | 2.36639600  | 0.87363800  |
| H | 3.43591200  | 0.85018600  | -0.11087700 |
| C | -1.66283100 | -3.82327700 | 0.65359900  |
| C | -1.84997600 | -3.55547500 | -0.66827700 |
| C | -1.25792900 | -1.67075000 | 0.32027600  |
| N | -1.29746500 | -2.63227600 | 1.24787000  |
| H | -1.74890700 | -4.74423600 | 1.20776100  |
| H | -2.13431300 | -4.20141100 | -1.48370200 |
| N | -1.58870800 | -2.21385200 | -0.85227700 |
| C | -1.68116500 | -1.45288600 | -2.10912700 |
| H | -1.45498300 | -2.15339100 | -2.91742400 |
| H | -0.88410100 | -0.70334700 | -2.05976000 |
| C | -3.05157000 | -0.81295100 | -2.27959500 |
| H | -3.07612100 | -0.26204200 | -3.22405400 |
| H | -3.85189300 | -1.55953200 | -2.29997000 |
| H | -3.24821600 | -0.10538400 | -1.46807800 |
| C | -0.96857800 | -2.40772100 | 2.65011000  |
| H | -0.09330500 | -2.99926500 | 2.92678600  |
| H | -0.74795100 | -1.34661600 | 2.77462400  |
| H | -1.81646700 | -2.68488500 | 3.28007800  |
| C | 4.57959100  | -0.69100100 | -0.28675700 |
| O | 5.64131100  | -1.16055300 | -0.62447900 |

|   |             |             |             |
|---|-------------|-------------|-------------|
| O | 4.34896000  | 0.62910100  | -0.38476700 |
| C | 3.44119100  | -1.50863400 | 0.28840400  |
| H | 2.49740100  | -1.26863500 | -0.21265800 |
| H | 3.67920100  | -2.56813000 | 0.19295300  |
| H | 3.31548900  | -1.26055100 | 1.34843300  |
| H | -0.97770300 | -0.62077900 | 0.53165500  |

---

| Route 6 | CP6-7       | HF=-1108.4923261 |             |
|---------|-------------|------------------|-------------|
| C       | 3.65709700  | -2.38036500      | 0.30450000  |
| H       | 4.51430300  | -2.21250900      | -0.33767900 |
| C       | 2.52232900  | -1.71021700      | 0.11837700  |
| C       | 1.25799600  | -1.76482000      | 0.97223700  |
| C       | 1.05369200  | -3.10050700      | 1.67902100  |
| H       | 1.83621500  | -3.25457500      | 2.42845900  |
| H       | 0.09145900  | -3.08253600      | 2.20065000  |
| H       | 1.05675700  | -3.91915500      | 0.96174800  |
| C       | 1.32444500  | -0.62650300      | 2.00196900  |
| H       | 1.45811000  | 0.33799000       | 1.50409200  |
| H       | 0.39314600  | -0.59878200      | 2.57687900  |
| H       | 2.16014700  | -0.78437300      | 2.68928400  |
| O       | 0.14258900  | -1.39487400      | 0.13663300  |
| H       | 3.73927500  | -3.12384300      | 1.08577200  |
| C       | -0.32550900 | -2.31286200      | -0.90152600 |
| O       | 0.29335500  | -3.34608800      | -1.08822900 |
| O       | 2.43020400  | -0.75170200      | -0.86709800 |
| O       | -1.33654900 | -1.81449200      | -1.46203300 |
| H       | 3.29637100  | 0.68633100       | -0.83989600 |
| H       | 1.47846600  | -0.53302600      | -0.91032100 |
| C       | -4.70036300 | 0.90969000       | 0.21898500  |
| C       | -3.86508000 | 1.96394600       | 0.42836000  |
| C       | -2.65792400 | 0.29590900       | -0.38710900 |
| N       | -3.92794600 | -0.11394000      | -0.28779600 |
| H       | -5.76082100 | 0.80585300       | 0.38567100  |
| H       | -4.06397100 | 2.95180100       | 0.81160600  |
| N       | -2.60138200 | 1.55945700       | 0.04509100  |

|   |             |             |             |
|---|-------------|-------------|-------------|
| C | -1.37386000 | 2.36724900  | 0.08954200  |
| H | -1.49867600 | 3.20338500  | -0.60528000 |
| H | -0.56446500 | 1.74172400  | -0.28648700 |
| C | -1.04564600 | 2.85801500  | 1.48965900  |
| H | -0.08163600 | 3.36929300  | 1.44925100  |
| H | -1.79523800 | 3.55608500  | 1.87574500  |
| H | -0.95518900 | 2.01896900  | 2.18415300  |
| C | -4.37045100 | -1.45298700 | -0.67067100 |
| H | -5.12440800 | -1.37902500 | -1.45734600 |
| H | -3.49297800 | -1.99486800 | -1.03675900 |
| H | -4.79330200 | -1.96141300 | 0.19863400  |
| C | 2.92639000  | 2.53713600  | -0.57269300 |
| O | 1.74125300  | 2.36733300  | -0.32822800 |
| O | 3.77543800  | 1.56075800  | -0.85584600 |
| C | 3.59435800  | 3.88803500  | -0.58627200 |
| H | 4.05239200  | 4.06544400  | -1.56336700 |
| H | 2.86591900  | 4.66811900  | -0.36805100 |
| H | 4.39849800  | 3.90985200  | 0.15493500  |
| H | -1.86025100 | -0.38716800 | -0.79062900 |

---

|   | Route 6 | TS6-6       | HF=-1108.4775786 |             |
|---|---------|-------------|------------------|-------------|
| C |         | 2.92045800  | -2.67091800      | 1.00374200  |
| H |         | 3.90281100  | -2.69765600      | 0.54532200  |
| C |         | 1.91864500  | -1.98278000      | 0.45319800  |
| C |         | 0.48262800  | -1.79837700      | 0.99141800  |
| C |         | -0.10148500 | -3.10950300      | 1.52408000  |
| H |         | 0.47814400  | -3.48905700      | 2.37129700  |
| H |         | -1.12718600 | -2.93785600      | 1.87005100  |
| H |         | -0.11282600 | -3.87231500      | 0.74436500  |
| C |         | 0.53631200  | -0.75057700      | 2.12054300  |
| H |         | 0.98327000  | 0.17808700       | 1.75184500  |
| H |         | -0.47647000 | -0.53849000      | 2.48467600  |
| H |         | 1.13867500  | -1.10530000      | 2.96271500  |
| O |         | -0.27906700 | -1.26912400      | -0.07189500 |

|   |             |             |             |
|---|-------------|-------------|-------------|
| H | 2.77198100  | -3.22453300 | 1.92252100  |
| C | -1.06157000 | -2.45734000 | -1.50674400 |
| O | -0.29287200 | -3.34392200 | -1.65016800 |
| O | 2.06509600  | -1.25911300 | -0.69337400 |
| O | -2.05473000 | -1.84348300 | -1.75509000 |
| H | 3.20666300  | -0.09734600 | -0.75377500 |
| H | 1.09760800  | -0.99254200 | -0.83608500 |
| C | -4.15615800 | 1.83327800  | -0.00542500 |
| C | -3.13956300 | 2.73201400  | -0.10270600 |
| C | -2.24511500 | 0.70632200  | 0.01267100  |
| N | -3.57824900 | 0.58285800  | 0.06400700  |
| H | -5.22520500 | 1.97428500  | 0.01090900  |
| H | -3.15509300 | 3.80653000  | -0.18953900 |
| N | -1.96483500 | 2.00976100  | -0.08899300 |
| C | -0.60447500 | 2.56291300  | -0.17259300 |
| H | -0.54362800 | 3.14711300  | -1.09551600 |
| H | 0.08376600  | 1.72286100  | -0.27060500 |
| C | -0.24351200 | 3.40530400  | 1.03969600  |
| H | 0.80007900  | 3.70856000  | 0.93622100  |
| H | -0.86908700 | 4.29958400  | 1.12680100  |
| H | -0.33637500 | 2.82193600  | 1.95981500  |
| C | -4.28726300 | -0.68609200 | 0.18106300  |
| H | -5.20636200 | -0.63332200 | -0.40443000 |
| H | -3.64822900 | -1.46881200 | -0.22764800 |
| H | -4.52998700 | -0.88833400 | 1.22715000  |
| C | 3.55972500  | 1.77309100  | -0.49381500 |
| O | 2.40784600  | 2.06752700  | -0.21087600 |
| O | 3.96823300  | 0.55515900  | -0.80284700 |
| C | 4.68902100  | 2.77300800  | -0.53000800 |
| H | 5.15680800  | 2.77026800  | -1.51858200 |
| H | 4.31537400  | 3.76931000  | -0.29577400 |
| H | 5.45943800  | 2.48498200  | 0.19115700  |
| H | -1.48450500 | -0.12470200 | 0.04530900  |

---

| Route 6 | CP6-8       | HF=-1108.5026951 |             |
|---------|-------------|------------------|-------------|
| C       | 0.34869500  | -1.48644200      | 2.08580400  |
| H       | 1.39456000  | -1.74534700      | 1.95418300  |
| C       | -0.44879500 | -1.27578600      | 1.01556300  |
| C       | -1.97573300 | -1.03807200      | 1.14384300  |
| C       | -2.68286100 | -2.36824700      | 1.43202800  |
| H       | -2.38485000 | -2.77118200      | 2.40458800  |
| H       | -3.76837100 | -2.22602400      | 1.41867800  |
| H       | -2.42061800 | -3.10324600      | 0.66503200  |
| C       | -2.32996700 | 0.01192800       | 2.19199600  |
| H       | -1.80224800 | 0.94947500       | 1.99264600  |
| H       | -3.40730600 | 0.20724700       | 2.17376000  |
| H       | -2.06079500 | -0.32252300      | 3.19735400  |
| O       | -2.41471700 | -0.55308400      | -0.12805800 |
| H       | -0.05303300 | -1.51382300      | 3.09240100  |
| C       | -4.80155800 | 0.35626900       | -1.15410200 |
| O       | -5.45233600 | -0.12987400      | -0.31689500 |
| O       | -0.05340700 | -1.25815900      | -0.25095000 |
| O       | -4.21325000 | 0.87606300       | -2.02053300 |
| H       | 1.01048100  | -2.12187900      | -0.65489000 |
| H       | -1.67891800 | -0.87427800      | -0.70364300 |
| C       | 0.91274100  | 3.56469300       | -0.60892000 |
| C       | 2.08968800  | 3.35663000       | 0.04140700  |
| C       | 1.13328300  | 1.38662900       | -0.27308100 |
| N       | 0.33236900  | 2.32793000       | -0.78890800 |
| H       | 0.44621100  | 4.47262200       | -0.95604800 |
| H       | 2.84352900  | 4.05064600       | 0.37716100  |
| N       | 2.20785500  | 1.99786800       | 0.23593300  |
| C       | 3.29254400  | 1.32533300       | 0.96601800  |
| H       | 4.20373800  | 1.89522900       | 0.76295500  |
| H       | 3.40048000  | 0.33986100       | 0.50652200  |
| C       | 2.99748000  | 1.24249000       | 2.45673800  |
| H       | 3.82448200  | 0.73432200       | 2.96105300  |
| H       | 2.88484900  | 2.23507200       | 2.90464600  |

|   |             |             |             |
|---|-------------|-------------|-------------|
| H | 2.08423100  | 0.66507600  | 2.63143900  |
| C | -0.94369500 | 2.06666500  | -1.45256400 |
| H | -0.77439900 | 1.80237800  | -2.49859600 |
| H | -1.46125500 | 1.25200500  | -0.93861400 |
| H | -1.55193600 | 2.96988700  | -1.40091100 |
| C | 2.87471700  | -2.17508100 | -1.26387100 |
| O | 3.07932100  | -0.97339300 | -1.09751600 |
| O | 1.74911600  | -2.78957600 | -1.01033800 |
| C | 3.94040900  | -3.10400700 | -1.80271100 |
| H | 3.58621400  | -3.57943500 | -2.72202400 |
| H | 4.85930900  | -2.55189400 | -1.99991100 |
| H | 4.13203000  | -3.90460800 | -1.08218100 |
| H | 0.91254300  | 0.30601600  | -0.28935800 |

---

|   | Route 6 | TS6-7       | HF=-919.9185502 |
|---|---------|-------------|-----------------|
| C |         | -1.90589300 | -0.86094300     |
| C |         | -2.50153600 | -0.98249700     |
| C |         | -3.94317900 | -0.49962100     |
| H |         | -4.62690000 | -1.07790100     |
| H |         | -4.25434700 | -0.61196700     |
| H |         | -4.04351400 | 0.55644200      |
| C |         | -2.36591100 | -2.41866900     |
| H |         | -1.34369600 | -2.76562000     |
| H |         | -2.61057600 | -2.47461500     |
| H |         | -3.04383700 | -3.07790600     |
| O |         | -0.74406100 | -1.35440700     |
| C |         | 3.23152300  | 0.64492200      |
| C |         | 3.56234400  | -0.05209100     |
| C |         | 1.40365900  | -0.34825400     |
| N |         | 1.88778200  | 0.43865900      |
| H |         | 3.82770600  | 1.27203300      |
| H |         | 4.50572300  | -0.16020100     |
| N |         | 2.40848000  | -0.65737700     |
| C |         | 2.26330500  | -1.52115100     |

|   |             |             |             |
|---|-------------|-------------|-------------|
| H | 2.85552400  | -1.06625000 | -2.27064800 |
| H | 1.20180400  | -1.48222000 | -1.73999600 |
| C | 2.70812800  | -2.94974500 | -1.19344300 |
| H | 2.59622600  | -3.54594700 | -2.10329100 |
| H | 3.75537600  | -3.00201700 | -0.87880100 |
| H | 2.08470400  | -3.40162200 | -0.41762400 |
| C | 1.07520700  | 1.08988300  | 2.52685400  |
| H | 1.66242900  | 1.17382300  | 3.44249100  |
| H | 0.77646700  | 2.07243700  | 2.15115000  |
| H | 0.18798800  | 0.47918300  | 2.69720700  |
| C | -0.34594000 | 2.52033300  | -0.74482000 |
| O | 0.46462600  | 2.98053200  | 0.04359800  |
| C | -0.11055300 | 2.50708500  | -2.23953800 |
| H | -0.90048300 | 3.06561600  | -2.75047800 |
| H | 0.85999600  | 2.94838500  | -2.46594700 |
| H | -0.15647600 | 1.47757100  | -2.60888700 |
| O | -1.49945400 | 2.00319300  | -0.34249500 |
| C | -2.55743200 | -0.07942300 | -1.76914900 |
| H | -1.93151500 | 1.29282600  | -1.02705100 |
| H | -2.15351100 | -0.10284300 | -2.77975400 |
| H | -3.62260300 | 0.11491000  | -1.69021600 |
| O | -1.65741000 | -0.18846800 | 1.48922600  |
| H | -1.66082300 | 0.71121800  | 1.11521100  |
| H | 0.36857000  | -0.69009500 | 0.38085000  |

---

|   | Route 6 | CP6-9       | HF=-919.9505424 |             |
|---|---------|-------------|-----------------|-------------|
| C |         | -1.95881100 | -1.34579400     | -0.62706900 |
| C |         | -2.28586200 | -0.99444600     | 0.85402600  |
| C |         | -3.69069700 | -0.42416100     | 1.05689300  |
| H |         | -4.47190700 | -1.13812900     | 0.77247700  |
| H |         | -3.81945400 | -0.18395300     | 2.11643500  |
| H |         | -3.82275800 | 0.49842100      | 0.48616900  |
| C |         | -2.07104900 | -2.23604200     | 1.71565000  |
| H |         | -1.08058900 | -2.65530100     | 1.52617600  |

|   |             |             |             |
|---|-------------|-------------|-------------|
| H | -2.14664800 | -1.95578400 | 2.77027400  |
| H | -2.82055200 | -3.00592600 | 1.50392500  |
| O | -0.91988200 | -1.94385300 | -0.87359500 |
| C | 3.47774100  | 0.69775700  | 1.03205500  |
| C | 3.67004400  | -0.06311400 | -0.07878800 |
| C | 1.52390200  | -0.13827000 | 0.43972000  |
| N | 2.13975000  | 0.61988200  | 1.34677500  |
| H | 4.16982800  | 1.28727300  | 1.61157900  |
| H | 4.56332300  | -0.27601900 | -0.64347800 |
| N | 2.43726800  | -0.57965300 | -0.42896600 |
| C | 2.16632300  | -1.47496300 | -1.55809600 |
| H | 2.66079600  | -1.04526800 | -2.43435400 |
| H | 1.08759800  | -1.45691000 | -1.72481800 |
| C | 2.63754100  | -2.89731600 | -1.29158800 |
| H | 2.43161500  | -3.51762900 | -2.16825900 |
| H | 3.71208100  | -2.94264800 | -1.08839300 |
| H | 2.10013300  | -3.32571300 | -0.44182800 |
| C | 1.42717000  | 1.41943600  | 2.33591500  |
| H | 2.04867400  | 1.52568700  | 3.22658900  |
| H | 1.18918500  | 2.38129100  | 1.87733900  |
| H | 0.49324100  | 0.91028300  | 2.57581300  |
| C | -0.67749500 | 2.51257000  | -0.75521300 |
| O | 0.49264400  | 2.32880300  | -0.36084300 |
| C | -0.94499000 | 3.61659100  | -1.77796500 |
| H | -1.68537100 | 4.31777100  | -1.38011100 |
| H | -0.02712800 | 4.15194600  | -2.02768700 |
| H | -1.37517300 | 3.18460400  | -2.68767400 |
| O | -1.71106800 | 1.85682700  | -0.38613400 |
| O | -1.31754500 | -0.03279300 | 1.23677500  |
| H | -1.44933900 | 0.80184200  | 0.62884100  |
| H | 0.45485200  | -0.35491000 | 0.45959000  |
| C | -2.84604400 | -0.84724600 | -1.73313300 |
| H | -3.89247000 | -1.12505300 | -1.57728100 |
| H | -2.78794500 | 0.24986400  | -1.71839600 |

| H       | -2.49093500 | -1.22921500      | -2.69166900 |
|---------|-------------|------------------|-------------|
| Route 7 | CP7-1       | HF=-1032.0095735 |             |
| C       | 2.74061800  | -1.79281400      | 1.90137600  |
| C       | 3.50089800  | -1.64519400      | 0.78066700  |
| C       | 1.59766300  | -0.57821100      | 0.45296000  |
| N       | 1.56126400  | -1.11745800      | 1.67544200  |
| H       | 2.94031600  | -2.30344200      | 2.82969600  |
| H       | 4.49285600  | -1.99901000      | 0.54975700  |
| N       | 2.77128800  | -0.88620900      | -0.10635200 |
| C       | 3.20474000  | -0.43858000      | -1.44418500 |
| H       | 4.28347500  | -0.61159400      | -1.48262500 |
| H       | 3.00692600  | 0.64028600       | -1.49134700 |
| C       | 2.47009800  | -1.16976400      | -2.55671900 |
| H       | 2.87892200  | -0.84952200      | -3.51937200 |
| H       | 2.58179900  | -2.25600400      | -2.47952700 |
| H       | 1.41175900  | -0.89890800      | -2.53820000 |
| C       | 0.43270500  | -1.00343700      | 2.59648500  |
| H       | 0.00655600  | -0.00421300      | 2.49413500  |
| H       | -0.31871700 | -1.75734500      | 2.35127800  |
| H       | 0.79888400  | -1.15331800      | 3.61266300  |
| C       | -0.58305800 | 2.83478300       | 0.73387000  |
| O       | -0.27300000 | 1.83616400       | 1.37476200  |
| O       | -0.14682700 | 3.11898100       | -0.47538600 |
| C       | -1.52831400 | 3.88900500       | 1.25887200  |
| H       | -1.09916100 | 4.88455100       | 1.12216500  |
| H       | -2.46217300 | 3.85586400       | 0.68909100  |
| H       | -1.73947700 | 3.70873200       | 2.31300400  |
| C       | 0.76752100  | 2.08175000       | -1.09477600 |
| O       | 1.93807800  | 2.43354600       | -1.10246500 |
| O       | 0.15638000  | 1.07658000       | -1.48086700 |
| C       | -1.31864300 | -3.14165400      | -0.03142200 |
| H       | -0.59976500 | -3.92021000      | 0.08675400  |
| C       | -2.15275300 | -2.27779600      | -0.18659400 |

|   |             |             |             |
|---|-------------|-------------|-------------|
| C | -3.20831200 | -1.26681900 | -0.42401900 |
| O | -4.47300100 | -1.92783000 | -0.51507700 |
| H | -4.43399300 | -2.51098500 | -1.28313200 |
| C | -3.32833700 | -0.32422300 | 0.77357000  |
| H | -2.40578600 | 0.24205900  | 0.91931800  |
| H | -4.14910700 | 0.37400400  | 0.58626000  |
| H | -3.55818200 | -0.89242500 | 1.67855500  |
| C | -2.90573300 | -0.48990100 | -1.71063500 |
| H | -1.96854700 | 0.07018900  | -1.63450700 |
| H | -2.83044000 | -1.17410700 | -2.56327300 |
| H | -3.72784600 | 0.20764300  | -1.89798800 |
| H | 0.81623400  | 0.01103200  | -0.03077300 |

---

|   | Route 7 | TS7-1      | HF=-1031.9513112 |             |
|---|---------|------------|------------------|-------------|
| C |         | 3.45652400 | -0.21425700      | 1.39249200  |
| C |         | 3.77852200 | -0.75564700      | 0.18696000  |
| C |         | 1.63251700 | -1.15099300      | 0.55519900  |
| N |         | 2.12229900 | -0.48283300      | 1.60161300  |
| H |         | 4.05242900 | 0.33770500       | 2.10112500  |
| H |         | 4.71304000 | -0.77359100      | -0.35069200 |
| N |         | 2.63149900 | -1.33767900      | -0.31361800 |
| C |         | 2.47793400 | -1.91322500      | -1.65674600 |
| H |         | 3.47509600 | -2.23336800      | -1.97287300 |
| H |         | 2.13222700 | -1.10734100      | -2.30944800 |
| C |         | 1.48920800 | -3.06516600      | -1.68246600 |
| H |         | 1.43769800 | -3.46415500      | -2.69931200 |
| H |         | 1.79436000 | -3.87288100      | -1.01034500 |
| H |         | 0.48971800 | -2.71990500      | -1.40435900 |
| C |         | 1.29715000 | 0.00781500       | 2.69757800  |
| H |         | 1.19770300 | 1.08961200       | 2.59835400  |
| H |         | 0.31213300 | -0.45189200      | 2.60673300  |
| H |         | 1.75367400 | -0.25995700      | 3.65278200  |
| C |         | 0.76298700 | 2.81333900       | -0.39294900 |
| O |         | 1.42620900 | 2.24276400       | 0.45199800  |

|   |             |             |             |
|---|-------------|-------------|-------------|
| O | -0.16833900 | 2.22919400  | -1.14869200 |
| C | 0.88844700  | 4.27947000  | -0.72319000 |
| H | 1.03411900  | 4.41481200  | -1.79801500 |
| H | -0.03787300 | 4.79554100  | -0.45336500 |
| H | 1.72300000  | 4.71119500  | -0.17126000 |
| C | -0.43883400 | 0.80671100  | -0.90036500 |
| O | 0.09011100  | 0.02692200  | -1.66403000 |
| O | -1.24902400 | 0.68616100  | 0.06129800  |
| C | -1.27121000 | -1.89969100 | 0.68574200  |
| H | -1.59596400 | -2.89350000 | 0.97539800  |
| C | -2.07244200 | -0.95982000 | 0.39282000  |
| C | -3.49417500 | -0.49823300 | 0.22605900  |
| O | -4.30475500 | -1.65331200 | 0.46817000  |
| H | -3.97815800 | -2.34381900 | -0.12271700 |
| C | -3.89940000 | 0.51022300  | 1.29916500  |
| H | -3.29608500 | 1.41478700  | 1.21535400  |
| H | -4.95741900 | 0.76391500  | 1.17985400  |
| H | -3.75608200 | 0.07133800  | 2.28970500  |
| C | -3.78660100 | 0.03890400  | -1.17990900 |
| H | -3.27883100 | 0.98780300  | -1.36031900 |
| H | -3.45819600 | -0.67475400 | -1.94292800 |
| H | -4.86609000 | 0.18691100  | -1.28091300 |
| H | 0.55553700  | -1.48527800 | 0.48898400  |

---

|   | Route 7 | CP7-2      | HF=-1031.9879034 |
|---|---------|------------|------------------|
| C |         | 4.15423000 | 0.36557900       |
| C |         | 4.27562300 | -0.29487200      |
| C |         | 2.11943200 | -0.58809800      |
| N |         | 2.84619100 | 0.17114100       |
| H |         | 4.87076400 | 0.95046200       |
| H |         | 5.12087700 | -0.40162100      |
| N |         | 3.03425200 | -0.85504500      |
| C |         | 2.72813700 | -1.69776300      |
| H |         | 3.26024900 | -1.29706700      |

|   |             |             |             |
|---|-------------|-------------|-------------|
| H | 1.65813100  | -1.59059800 | -1.70123200 |
| C | 3.09773000  | -3.15794100 | -1.28102300 |
| H | 2.83805900  | -3.76050300 | -2.15725900 |
| H | 4.16980500  | -3.27528800 | -1.09223500 |
| H | 2.55386700  | -3.55078300 | -0.41749800 |
| C | 2.28088000  | 0.74151100  | 2.68822100  |
| H | 2.29046500  | 1.83417400  | 2.64363200  |
| H | 1.24752600  | 0.40582900  | 2.75782500  |
| H | 2.83600500  | 0.40961600  | 3.57163000  |
| C | -0.15262600 | 2.73087400  | -0.48508600 |
| O | 0.11273200  | 2.46468100  | 0.65230200  |
| O | -0.55171600 | 1.80647500  | -1.43574900 |
| C | -0.06554100 | 4.08232200  | -1.13406400 |
| H | 0.62006300  | 4.04288000  | -1.98501500 |
| H | -1.04640700 | 4.37444300  | -1.51988700 |
| H | 0.28294000  | 4.81195800  | -0.40438700 |
| C | -0.90269300 | 0.51013200  | -1.13415900 |
| O | -0.61045900 | -0.38953700 | -1.86734700 |
| O | -1.67799700 | 0.48027800  | -0.05029900 |
| C | -1.21957200 | -1.62910500 | 0.94576500  |
| H | -1.58632200 | -2.54894400 | 1.38611100  |
| C | -2.10019100 | -0.77124700 | 0.44950100  |
| C | -3.61346100 | -0.91509200 | 0.40956100  |
| O | -3.97160700 | -2.22925000 | 0.81477000  |
| H | -3.60561400 | -2.83707900 | 0.15944100  |
| C | -4.26007900 | 0.02250400  | 1.43020600  |
| H | -3.97570800 | 1.05974900  | 1.23675400  |
| H | -5.34918800 | -0.06453500 | 1.37622400  |
| H | -3.93544500 | -0.24996700 | 2.43737900  |
| C | -4.14536200 | -0.63922100 | -1.00380300 |
| H | -3.97527000 | 0.39756400  | -1.30537200 |
| H | -3.65555200 | -1.28783100 | -1.73832900 |
| H | -5.22113900 | -0.83453200 | -1.02327400 |
| H | -0.14786400 | -1.41928800 | 0.91860900  |

---

| Route 7 | TS7-2       | HF=-1031.9519949 |             |
|---------|-------------|------------------|-------------|
| C       | 4.38519500  | -0.24897000      | -1.33344100 |
| C       | 3.89581200  | -1.50156100      | -1.11318500 |
| N       | 3.53610700  | 0.63006500       | -0.69488500 |
| H       | 5.24639400  | 0.08472300       | -1.89002900 |
| H       | 4.25177100  | -2.46531600      | -1.44103600 |
| N       | 2.75672000  | -1.36129200      | -0.34906300 |
| C       | 1.89757700  | -2.43742600      | 0.17151600  |
| H       | 1.92765300  | -3.24604600      | -0.56373000 |
| H       | 0.87611100  | -2.04749000      | 0.20581000  |
| C       | 2.34962400  | -2.90573400      | 1.54659700  |
| H       | 1.69471200  | -3.71407700      | 1.88305500  |
| H       | 3.37827900  | -3.27963100      | 1.53404700  |
| H       | 2.27501400  | -2.08799700      | 2.26829900  |
| C       | 3.62590000  | 2.08989000       | -0.65380000 |
| H       | 3.67176400  | 2.47477500       | -1.67469600 |
| H       | 2.72104400  | 2.45312500       | -0.14381300 |
| H       | 4.52505700  | 2.38421300       | -0.10765500 |
| C       | -4.21973400 | -0.58203200      | -0.86487300 |
| O       | -3.65867300 | 0.08545200       | -1.69445500 |
| O       | -3.57454700 | -1.20035500      | 0.17073800  |
| C       | -5.68973600 | -0.88410000      | -0.80845200 |
| H       | -5.85105200 | -1.96458100      | -0.76951600 |
| H       | -6.11682900 | -0.45634600      | 0.10335400  |
| H       | -6.18067900 | -0.45918400      | -1.68291800 |
| C       | -2.20932000 | -0.94778300      | 0.33269400  |
| O       | -1.40078500 | -1.81057300      | 0.11589300  |
| O       | -2.05419000 | 0.26837600       | 0.80081700  |
| C       | 0.11325400  | 0.24607300       | 2.04211900  |
| C       | -0.73404500 | 0.72228600       | 1.14397100  |
| C       | -0.33006400 | 2.03176700       | 0.44589000  |
| O       | 0.97617200  | 2.25217000       | 0.92110700  |
| H       | 0.93541300  | 1.39919200       | 1.74421000  |

|   |             |             |             |
|---|-------------|-------------|-------------|
| C | -0.35916900 | 1.89463400  | -1.08290600 |
| H | -1.36363300 | 1.65895600  | -1.44743600 |
| H | -0.03476500 | 2.83171400  | -1.54880500 |
| H | 0.31126700  | 1.09547600  | -1.41827000 |
| C | -1.25501600 | 3.17884900  | 0.88368100  |
| H | -2.29611200 | 2.99898100  | 0.59400100  |
| H | -1.20535000 | 3.29173300  | 1.97015200  |
| H | -0.92361300 | 4.11661700  | 0.42452200  |
| H | -0.13237400 | -0.63818300 | 2.63107700  |
| C | 2.56087300  | -0.06379500 | -0.10340900 |
| H | 1.74942400  | 0.37479600  | 0.48581200  |

|         |       |                 |  |
|---------|-------|-----------------|--|
| Route 7 | CP7-3 | HF=-1032.002534 |  |
|---------|-------|-----------------|--|

|   |             |             |             |
|---|-------------|-------------|-------------|
| C | 4.86045300  | -0.06800300 | -1.10684300 |
| C | 4.32481200  | -1.30877400 | -0.98526300 |
| N | 3.92723700  | 0.80548900  | -0.57549100 |
| H | 5.80085500  | 0.25642900  | -1.52609400 |
| H | 4.71077800  | -2.27363600 | -1.27768800 |
| N | 3.08654400  | -1.14052100 | -0.38816300 |
| C | 2.18265000  | -2.23299100 | -0.04250100 |
| H | 2.12572600  | -2.91354700 | -0.89910300 |
| H | 1.19266600  | -1.79458900 | 0.09551100  |
| C | 2.62116800  | -2.97925400 | 1.21135700  |
| H | 1.90951300  | -3.77869200 | 1.43816200  |
| H | 3.61106900  | -3.43051900 | 1.08837500  |
| H | 2.65934600  | -2.29923700 | 2.06692000  |
| C | 4.08476000  | 2.24672300  | -0.50724700 |
| H | 4.26806700  | 2.66001300  | -1.50364500 |
| H | 3.16013000  | 2.66395500  | -0.10698600 |
| H | 4.91861000  | 2.51547500  | 0.14863300  |
| C | -4.49130000 | -0.31373800 | -0.85704700 |
| O | -3.98328400 | 0.60034700  | -1.44772900 |
| O | -3.77869800 | -1.22688500 | -0.11174300 |
| C | -5.94800700 | -0.66982700 | -0.83421600 |

|   |             |             |             |
|---|-------------|-------------|-------------|
| H | -6.08580000 | -1.70522100 | -1.15688400 |
| H | -6.32929900 | -0.59236400 | 0.18818600  |
| H | -6.49588700 | 0.00649700  | -1.48872600 |
| C | -2.43526300 | -1.01084700 | 0.13969800  |
| O | -1.60170900 | -1.80955000 | -0.17517900 |
| O | -2.29641400 | 0.11552200  | 0.83358700  |
| C | -0.45160600 | -0.11079800 | 2.29779900  |
| C | -0.99875000 | 0.49675000  | 1.25336200  |
| C | -0.43132000 | 1.69336400  | 0.49729100  |
| O | 0.87888800  | 1.93111800  | 0.94575900  |
| H | 0.51027500  | 0.23703700  | 2.65109600  |
| C | -0.46951300 | 1.44503300  | -1.01960500 |
| H | -1.49062000 | 1.31192900  | -1.38608600 |
| H | -0.03079600 | 2.31253100  | -1.52159100 |
| H | 0.12129500  | 0.56375100  | -1.28305900 |
| C | -1.26123900 | 2.93426300  | 0.84897700  |
| H | -2.31255500 | 2.79649200  | 0.58191500  |
| H | -1.18531200 | 3.13941200  | 1.92020100  |
| H | -0.86762400 | 3.79590100  | 0.30175200  |
| H | -0.94438300 | -0.93415700 | 2.80250000  |
| C | 2.81741100  | 0.16427400  | -0.11900800 |
| H | 1.48167200  | 1.20630500  | 0.59409900  |

---

| Route 7 | TS7-3      | HF=-1031.9829841 |             |
|---------|------------|------------------|-------------|
| C       | 3.72509200 | 0.59410200       | -1.13573500 |
| C       | 3.97386500 | -0.19541400      | -0.05878200 |
| C       | 1.78792500 | -0.41901800      | -0.58107100 |
| N       | 2.38482300 | 0.44145500       | -1.43535900 |
| H       | 4.37814000 | 1.23653900       | -1.70579200 |
| H       | 4.88535100 | -0.37279300      | 0.49042700  |
| N       | 2.77550700 | -0.80566800      | 0.25745000  |
| C       | 2.55323900 | -1.68574100      | 1.40594000  |
| H       | 3.35730200 | -2.42946900      | 1.42008600  |
| H       | 1.60885800 | -2.20023600      | 1.21751800  |

|   |             |             |             |
|---|-------------|-------------|-------------|
| C | 2.48051800  | -0.91676600 | 2.71868800  |
| H | 2.34040900  | -1.61786300 | 3.54695200  |
| H | 3.39925800  | -0.35164900 | 2.90623700  |
| H | 1.63209500  | -0.22770100 | 2.70796700  |
| C | 1.68184500  | 1.15513100  | -2.49467000 |
| H | 1.17748000  | 0.44111200  | -3.14810000 |
| H | 0.94929800  | 1.84299100  | -2.06366400 |
| H | 2.40971700  | 1.71668400  | -3.08236000 |
| C | -0.97124800 | 2.58955600  | 0.10368700  |
| O | -0.46111000 | 3.22103100  | -0.79240200 |
| O | -0.94544600 | 1.22909700  | 0.01511000  |
| C | -1.65801400 | 3.21087400  | 1.28802600  |
| H | -1.08722900 | 3.00635700  | 2.19675400  |
| H | -1.73058700 | 4.28432500  | 1.11835500  |
| H | -2.65323600 | 2.77989600  | 1.42927800  |
| C | -2.80138700 | -0.77811400 | -0.19868600 |
| C | -1.60784700 | -1.65655600 | -0.60619600 |
| O | -0.53396700 | -1.22079800 | 0.18707800  |
| C | -1.91461100 | -3.11892000 | -0.24833600 |
| H | -2.78442200 | -3.49430200 | -0.79620400 |
| H | -1.04835400 | -3.74375100 | -0.48976400 |
| H | -2.11260600 | -3.20342000 | 0.82336100  |
| C | -1.31785900 | -1.50834100 | -2.10419100 |
| H | -1.12804500 | -0.46106700 | -2.35125500 |
| H | -0.44180700 | -2.10653500 | -2.37518800 |
| H | -2.16228400 | -1.85504800 | -2.70688100 |
| C | -1.29974700 | 0.41763100  | 1.13107400  |
| O | -2.55832900 | -0.09237100 | 0.97106300  |
| O | -0.79114500 | 0.56246200  | 2.20952900  |
| C | -4.00123200 | -0.70276600 | -0.76791100 |
| H | -4.77386600 | -0.05992200 | -0.36262100 |
| H | -4.23702900 | -1.30152100 | -1.63923600 |
| H | 0.43598400  | -0.84244200 | -0.32457100 |

---

| Route 7 | CP7-4       | HF=-1032.0511324 |             |
|---------|-------------|------------------|-------------|
| C       | 4.24168500  | 0.26360700       | -1.27607700 |
| C       | 4.23644600  | -0.85978100      | -0.50992400 |
| C       | 2.17265800  | -0.06643100      | -0.55571600 |
| N       | 2.94393500  | 0.73601500       | -1.29360000 |
| H       | 5.04195500  | 0.75466700       | -1.80605300 |
| H       | 5.03406200  | -1.53358400      | -0.24074500 |
| N       | 2.93648600  | -1.05384200      | -0.08325000 |
| C       | 2.47180400  | -2.05619100      | 0.88221300  |
| H       | 3.04541400  | -2.96981800      | 0.69831900  |
| H       | 1.42728600  | -2.25937200      | 0.63544800  |
| C       | 2.62411000  | -1.55660100      | 2.31314100  |
| H       | 2.19528000  | -2.28935400      | 3.00326100  |
| H       | 3.67739700  | -1.41584600      | 2.57636600  |
| H       | 2.10515000  | -0.60003600      | 2.42962700  |
| C       | 2.45006100  | 1.95942300       | -1.90905800 |
| H       | 1.41361000  | 2.08736000       | -1.58561600 |
| H       | 3.04554600  | 2.80666000       | -1.56262800 |
| H       | 2.50661900  | 1.88584000       | -2.99793600 |
| C       | 0.28273800  | 1.79705100       | 1.08691900  |
| O       | 1.41407700  | 1.50345400       | 1.53328000  |
| O       | -0.21143000 | 1.37414300       | -0.01516100 |
| C       | -0.60108700 | 2.74346900       | 1.90236600  |
| H       | -1.53042200 | 2.23337700       | 2.17628700  |
| H       | -0.08770700 | 3.07973800       | 2.80507500  |
| H       | -0.88029900 | 3.60984900       | 1.29343300  |
| C       | -3.06988600 | -0.45638400      | 0.69733200  |
| C       | -3.34286600 | -0.14921600      | -0.76370100 |
| O       | -2.23807200 | -0.84081700      | -1.41039800 |
| C       | -4.63897300 | -0.77888400      | -1.26077500 |
| H       | -5.49406000 | -0.30579700      | -0.77020700 |
| H       | -4.73446400 | -0.63499200      | -2.34062600 |
| H       | -4.66426500 | -1.84982400      | -1.04289900 |
| C       | -3.22931400 | 1.33391500       | -1.08869800 |

|   |             |             |             |
|---|-------------|-------------|-------------|
| H | -2.24644500 | 1.69769400  | -0.76999500 |
| H | -3.35477700 | 1.48656600  | -2.16510300 |
| H | -4.01618400 | 1.88680000  | -0.56642300 |
| C | -1.43240900 | -1.39535500 | -0.50244000 |
| O | -1.92485600 | -1.21652500 | 0.75481500  |
| O | -0.43114100 | -2.01346000 | -0.74171900 |
| C | -3.75572100 | -0.12600900 | 1.78449100  |
| H | -3.42469800 | -0.43107700 | 2.76944300  |
| H | -4.65640100 | 0.46913500  | 1.69994500  |
| H | 1.11036200  | 0.14675600  | -0.36798300 |

---

| Route 8 | CP8-1       | HF=-644.6781773 |             |
|---------|-------------|-----------------|-------------|
| C       | 1.88500100  | -0.64996200     | 0.08975900  |
| C       | 2.13360400  | 0.82283500      | -0.04381100 |
| O       | 1.24934400  | 1.37297700      | -0.98805500 |
| C       | 1.98632300  | 1.49270700      | 1.32920700  |
| H       | 2.66405000  | 1.05345200      | 2.06713900  |
| H       | 2.21964400  | 2.55548200      | 1.21969700  |
| H       | 0.95714900  | 1.40250800      | 1.68723700  |
| C       | 3.54985200  | 0.99557500      | -0.60518400 |
| H       | 3.62196500  | 0.53331000      | -1.59227200 |
| H       | 3.74671000  | 2.06594500      | -0.70698400 |
| H       | 4.29902400  | 0.55345100      | 0.05712300  |
| H       | 0.35578800  | 1.46566300      | -0.58306800 |
| C       | 1.74614700  | -1.86853200     | 0.16691400  |
| H       | 1.85618900  | -2.93036500     | 0.23796900  |
| Ag      | -0.42486900 | -1.08436500     | 0.00210200  |
| C       | -2.35442000 | 0.83539500      | 0.00781500  |
| O       | -1.25871700 | 1.43075200      | 0.16581500  |
| O       | -2.47394800 | -0.43122900     | -0.11669200 |
| C       | -3.62799700 | 1.65254000      | -0.06028000 |
| H       | -4.50831100 | 1.03068600      | 0.10527300  |
| H       | -3.58809100 | 2.46505600      | 0.66833500  |
| H       | -3.69979500 | 2.10660400      | -1.05433600 |

---

| Route 8 | TS8-1       | HF=-644.6125578 |             |
|---------|-------------|-----------------|-------------|
| C       | 1.68862900  | -0.66934400     | 0.53940700  |
| C       | 2.37695200  | 0.46082500      | -0.04159100 |
| O       | 1.30117000  | 0.40701900      | -0.96512800 |
| C       | 2.42909200  | 1.72924200      | 0.80250600  |
| H       | 3.14383300  | 1.62309900      | 1.62495600  |
| H       | 2.75333500  | 2.55851300      | 0.16602900  |
| H       | 1.44165200  | 1.97425800      | 1.19749900  |
| C       | 3.70439600  | 0.14806000      | -0.72189000 |
| H       | 3.62147500  | -0.76379800     | -1.31670900 |
| H       | 3.95822200  | 0.97843400      | -1.38793400 |
| H       | 4.50748900  | 0.02958300      | 0.01241600  |
| H       | 0.06665100  | 0.84304800      | -0.73767400 |
| C       | 0.95576700  | -1.61535900     | 0.97630000  |
| H       | 1.17017300  | -2.25355200     | 1.82350500  |
| Ag      | -0.94801500 | -1.40966600     | -0.01987800 |
| C       | -1.55561100 | 1.90535000      | -0.03289000 |
| O       | -1.04927700 | 0.87125200      | -0.71417800 |
| O       | -0.87282500 | 2.73522500      | 0.53229200  |
| C       | -3.06754800 | 1.93472800      | -0.04438000 |
| H       | -3.42101900 | 2.85794400      | 0.41427000  |
| H       | -3.44214800 | 1.85497900      | -1.06855800 |
| H       | -3.46558600 | 1.08281500      | 0.51783400  |

| Route 8 | CP8-2       | HF=-644.6389568 |             |
|---------|-------------|-----------------|-------------|
| C       | -2.09972300 | -0.22428200     | -0.00010700 |
| C       | -3.31987300 | 0.55697300      | 0.00001600  |
| O       | -1.95265500 | 1.14261600      | 0.00021400  |
| C       | -4.08235400 | 0.78368700      | -1.28181900 |
| H       | -4.91252200 | 0.07308800      | -1.35923400 |
| H       | -4.50326200 | 1.79552900      | -1.30787200 |
| H       | -3.43054500 | 0.64865600      | -2.14726900 |
| C       | -4.08240100 | 0.78310000      | 1.28193700  |

|    |             |             |             |
|----|-------------|-------------|-------------|
| H  | -3.43066300 | 0.64749600  | 2.14734800  |
| H  | -4.50313700 | 1.79500200  | 1.30850300  |
| H  | -4.91269900 | 0.07260600  | 1.35892200  |
| H  | 1.18357900  | 1.39958500  | 0.00024600  |
| C  | -1.32074900 | -1.29215100 | -0.00034200 |
| H  | -1.80867000 | -2.26378600 | -0.00058500 |
| Ag | 0.71595900  | -1.05257600 | -0.00005800 |
| C  | 3.02336200  | 0.93609000  | 0.00009300  |
| O  | 2.05708300  | 1.84352800  | 0.00002700  |
| O  | 2.82531900  | -0.27682000 | 0.00046600  |
| C  | 4.39230600  | 1.54211000  | -0.00018700 |
| H  | 5.14518900  | 0.75594800  | -0.00119300 |
| H  | 4.51017500  | 2.18038000  | -0.88044200 |
| H  | 4.51109600  | 2.17882000  | 0.88109100  |

---



---

Route 8

TS8-2

HF=-644.6236572

|    |             |             |             |
|----|-------------|-------------|-------------|
| C  | -1.73852300 | 0.25267300  | 0.20355100  |
| C  | -3.14556400 | 0.49508900  | -0.05094300 |
| O  | -2.05671300 | 0.47735700  | -1.08385000 |
| C  | -4.11461300 | -0.65326500 | -0.16328200 |
| H  | -4.64587200 | -0.78863200 | 0.78473900  |
| H  | -4.85993500 | -0.45275800 | -0.94082200 |
| H  | -3.59506100 | -1.58311900 | -0.40335100 |
| C  | -3.73202700 | 1.86261000  | 0.18706500  |
| H  | -2.95146700 | 2.62583000  | 0.20016200  |
| H  | -4.45811700 | 2.11019300  | -0.59503500 |
| H  | -4.25331000 | 1.88348500  | 1.14995900  |
| H  | 0.49362400  | 0.86862900  | 0.61360200  |
| C  | -0.62895400 | 0.05841300  | 0.93573000  |
| H  | -0.83446400 | -0.06711900 | 1.99973500  |
| Ag | 0.85551700  | -1.29863100 | 0.02632200  |
| C  | 2.50830900  | 1.17373800  | -0.04632600 |
| O  | 1.41918800  | 1.65694200  | 0.43217600  |
| O  | 2.71905400  | -0.02439800 | -0.35848500 |

|   |            |            |             |
|---|------------|------------|-------------|
| C | 3.61902800 | 2.18226900 | -0.24625900 |
| H | 4.52900700 | 1.68924700 | -0.58889300 |
| H | 3.30176000 | 2.92636800 | -0.98319700 |
| H | 3.80638100 | 2.71514800 | 0.69001900  |

---

| Route 8 | CP8-3       | HF=-644.6775275 |             |
|---------|-------------|-----------------|-------------|
| C       | -2.01262500 | -0.57047000     | 0.16422300  |
| C       | -2.66840800 | 0.70322700      | -0.04329100 |
| O       | -2.45991700 | 0.00514400      | 1.28071500  |
| C       | -1.88095200 | 1.97523600      | -0.20290200 |
| H       | -1.81284300 | 2.23235200      | -1.26504800 |
| H       | -2.39259400 | 2.79621700      | 0.30951700  |
| H       | -0.86557800 | 1.88299200      | 0.19015200  |
| C       | -4.10732400 | 0.71923300      | -0.48937300 |
| H       | -4.60426200 | -0.22698400     | -0.26622800 |
| H       | -4.64686900 | 1.53007000      | 0.01002600  |
| H       | -4.15815800 | 0.89503200      | -1.56868600 |
| H       | -1.40001700 | -2.56511000     | 0.53367000  |
| C       | -1.49142900 | -1.77192600     | -0.20303300 |
| H       | -1.46807100 | -2.03517600     | -1.25582200 |
| Ag      | 0.46610500  | -0.62470400     | -0.06073200 |
| C       | 2.81953000  | 0.53318900      | 0.00903400  |
| O       | 2.74902000  | -0.72313400     | -0.14919200 |
| O       | 1.79726400  | 1.26993300      | 0.13469900  |
| C       | 4.19506500  | 1.16566000      | 0.06321200  |
| H       | 4.12787800  | 2.25399000      | 0.06729600  |
| H       | 4.70774500  | 0.83046200      | 0.97027200  |
| H       | 4.79177200  | 0.82680300      | -0.78772700 |

---

| Route 8 | TS8-3       | HF=-833.1377308 |            |
|---------|-------------|-----------------|------------|
| C       | -1.50385800 | -0.26061100     | 0.60122000 |
| C       | -1.66295700 | 1.17024000      | 0.57802500 |
| O       | -2.92832600 | 0.25417700      | 0.33605700 |
| C       | -1.81491300 | 1.85613500      | 1.91012400 |

|    |             |             |             |
|----|-------------|-------------|-------------|
| H  | -0.81893500 | 2.17641100  | 2.23310900  |
| H  | -2.44653200 | 2.74182200  | 1.80238100  |
| H  | -2.24118500 | 1.19247500  | 2.66309800  |
| C  | -1.19727700 | 2.03334300  | -0.55496900 |
| H  | -1.25388800 | 1.53434200  | -1.52156400 |
| H  | -1.75963700 | 2.96947100  | -0.57840000 |
| H  | -0.13402300 | 2.23492800  | -0.36312300 |
| C  | -0.97752700 | -1.25849400 | 1.36529300  |
| H  | -0.40249800 | -0.93617600 | 2.23502700  |
| H  | -1.45184600 | -2.23287000 | 1.39827500  |
| C  | -2.90748400 | -0.31624100 | -1.18716000 |
| O  | -1.75334400 | -0.80708800 | -1.18759800 |
| O  | -3.87733000 | -0.16652500 | -1.84323600 |
| Ag | 1.01372000  | -1.09822300 | 0.22954900  |
| C  | 2.81662400  | 0.83535800  | -0.37189500 |
| O  | 1.83805300  | 1.38463300  | 0.18707500  |
| O  | 2.91347800  | -0.42420300 | -0.58441500 |
| C  | 3.99030300  | 1.67506600  | -0.84403000 |
| H  | 4.90734800  | 1.32820200  | -0.35907400 |
| H  | 4.12798000  | 1.54069000  | -1.92097400 |
| H  | 3.83067300  | 2.73044500  | -0.62029400 |

---

|   | Route 8 | CP8-4       | HF=-833.270114 |             |
|---|---------|-------------|----------------|-------------|
| C |         | -1.66123300 | -0.14228900    | 0.69962200  |
| C |         | -2.07580000 | 1.09959600     | -0.07785200 |
| O |         | -2.99898100 | 0.53039100     | -1.04041200 |
| C |         | -2.85044000 | 2.07587800     | 0.80447200  |
| H |         | -2.18192400 | 2.52821500     | 1.54163600  |
| H |         | -3.27176500 | 2.86970700     | 0.18282300  |
| H |         | -3.66499900 | 1.57174600     | 1.33089700  |
| C |         | -0.94283000 | 1.76959700     | -0.84435600 |
| H |         | -0.47692600 | 1.06620000     | -1.53969100 |
| H |         | -1.33740600 | 2.61376100     | -1.41625800 |
| H |         | -0.17231800 | 2.13712700     | -0.16091600 |

|    |             |             |             |
|----|-------------|-------------|-------------|
| C  | -0.84666800 | -0.25491200 | 1.78240100  |
| H  | -0.48120400 | 0.64697900  | 2.26503300  |
| H  | -0.84184000 | -1.18220600 | 2.34871200  |
| C  | -3.14981700 | -0.78535400 | -0.85737100 |
| O  | -2.35113300 | -1.19523000 | 0.21024800  |
| O  | -3.84326400 | -1.52854200 | -1.47104500 |
| Ag | 1.00395000  | -0.55986300 | 0.47657200  |
| C  | 3.33079200  | 0.28169900  | -0.49255600 |
| O  | 2.78285400  | 1.16996800  | 0.20081600  |
| O  | 2.81678900  | -0.87431500 | -0.70294700 |
| C  | 4.68412600  | 0.53854100  | -1.12697500 |
| H  | 5.42677500  | -0.12118500 | -0.66752000 |
| H  | 4.65004200  | 0.29158700  | -2.19140000 |
| H  | 4.98702000  | 1.57691400  | -0.98979500 |

---

|   | Route 8 | CP8-5      | HF=-909.7070242 |             |
|---|---------|------------|-----------------|-------------|
| C |         | 4.58688900 | 0.19124200      | -1.32999200 |
| H |         | 4.84055900 | -0.49096200     | -2.13218600 |
| C |         | 3.49693700 | 0.01171300      | -0.59769900 |
| C |         | 2.92958100 | 0.81852000      | 0.55571700  |
| C |         | 3.86733300 | 0.88886600      | 1.75213900  |
| H |         | 4.74906000 | 1.48228100      | 1.49530000  |
| H |         | 3.36224100 | 1.36673700      | 2.59559500  |
| H |         | 4.19681800 | -0.10883500     | 2.05260800  |
| C |         | 2.39603500 | 2.17747600      | 0.12053300  |
| H |         | 1.62478500 | 2.05183600      | -0.64431600 |
| H |         | 1.95927400 | 2.69798000      | 0.97743600  |
| H |         | 3.21477900 | 2.78382700      | -0.27746200 |
| O |         | 1.78398000 | -0.00886300     | 0.93397200  |
| H |         | 5.23998600 | 1.03355800      | -1.13805100 |
| C |         | 1.63833200 | -1.01116200     | 0.08242300  |
| O |         | 0.73985600 | -1.82688500     | 0.10240500  |
| O |         | 2.63740100 | -1.05223100     | -0.81980800 |

|    |             |             |             |
|----|-------------|-------------|-------------|
| O  | -0.32722400 | 0.82984600  | -1.36874800 |
| H  | -0.50823400 | 0.62020600  | -2.29148500 |
| H  | -1.17747500 | 1.25563500  | -1.04146800 |
| C  | -3.52933600 | 0.96227200  | -0.03067600 |
| O  | -3.38889200 | -0.25852400 | 0.32887800  |
| O  | -2.64685100 | 1.70261300  | -0.51869400 |
| C  | -4.92316700 | 1.53051200  | 0.18126000  |
| H  | -4.98353400 | 2.55644900  | -0.18326100 |
| H  | -5.65826900 | 0.90571400  | -0.33398900 |
| H  | -5.16933800 | 1.50204300  | 1.24700200  |
| Ag | -1.37983900 | -0.98214400 | 0.12783000  |

---

|   | Route 8 | TS8-4       | HF=-909.6686307 |             |
|---|---------|-------------|-----------------|-------------|
| C |         | 4.16982300  | 0.49215600      | -1.45004800 |
| H |         | 4.37112500  | 0.00523800      | -2.39663500 |
| C |         | 3.12841700  | 0.13898700      | -0.70263600 |
| C |         | 2.67486600  | 0.68807500      | 0.64202600  |
| C |         | 3.69288500  | 0.42563400      | 1.74821100  |
| H |         | 4.60430600  | 1.00308800      | 1.56910300  |
| H |         | 3.27738200  | 0.72248900      | 2.71579400  |
| H |         | 3.95317900  | -0.63478300     | 1.78755200  |
| C |         | 2.26676400  | 2.15646000      | 0.56870800  |
| H |         | 1.50322700  | 2.29366900      | -0.19804200 |
| H |         | 1.86949900  | 2.48198100      | 1.53495200  |
| H |         | 3.13439800  | 2.77658300      | 0.32402600  |
| O |         | 1.51780800  | -0.13020200     | 0.91857000  |
| H |         | 4.84357900  | 1.27173000      | -1.11585400 |
| C |         | 1.18551900  | -0.85151200     | -0.18994500 |
| O |         | 0.50845200  | -1.90152700     | -0.08614100 |
| O |         | 2.26889800  | -0.86408300     | -1.06022600 |
| O |         | 0.14320100  | 0.35471400      | -1.02734000 |
| H |         | 0.14762200  | 0.08844800      | -1.95558900 |
| H |         | -0.93405700 | 1.17301300      | -0.69878000 |

|    |             |             |             |
|----|-------------|-------------|-------------|
| C  | -2.86916900 | 1.44452700  | -0.12289000 |
| O  | -3.13484800 | 0.26220800  | 0.17714700  |
| O  | -1.72713500 | 1.88866400  | -0.53363800 |
| C  | -3.94162900 | 2.49537300  | -0.01682700 |
| H  | -4.11666200 | 2.93676400  | -1.00220400 |
| H  | -4.86379300 | 2.06123700  | 0.36721100  |
| H  | -3.59987800 | 3.29951700  | 0.64062600  |
| Ag | -1.54565500 | -1.24032700 | 0.18002700  |

|   | Route 8 | CP8-6       | HF=-909.6957858 |             |
|---|---------|-------------|-----------------|-------------|
| C |         | -2.94924400 | -0.65898500     | 0.38927300  |
| H |         | -3.43254500 | -1.14585900     | 1.23463900  |
| C |         | -2.18348700 | 0.51838700      | 0.76319100  |
| C |         | -1.86627600 | 1.59603500      | -0.32495100 |
| C |         | -1.95323600 | 1.18499600      | -1.78801300 |
| H |         | -2.98042000 | 0.91519100      | -2.04533900 |
| H |         | -1.66173600 | 2.02865800      | -2.42141400 |
| H |         | -1.30264400 | 0.33854000      | -2.01576800 |
| C |         | -2.74960600 | 2.80480900      | -0.03226400 |
| H |         | -2.61891800 | 3.10869700      | 1.00849300  |
| H |         | -2.49439900 | 3.63865600      | -0.69300900 |
| H |         | -3.79935800 | 2.54259900      | -0.19142300 |
| O |         | -0.50921600 | 2.09636600      | -0.05782300 |
| H |         | -3.57006200 | -0.59959800     | -0.50267800 |
| C |         | 0.49602300  | 1.24236000      | 0.05413400  |
| O |         | 0.54049000  | 0.06736000      | -0.24251700 |
| O |         | -1.75873000 | 0.75343600      | 1.89322900  |
| O |         | 1.58896300  | 1.87041100      | 0.52977400  |
| H |         | 1.35729200  | 2.78505700      | 0.74705100  |
| H |         | 3.37167000  | 1.22576400      | -0.04586100 |
| C |         | 4.74027200  | -0.12667100     | -0.08519900 |
| O |         | 5.78856200  | -0.51596400     | -0.53604600 |
| O |         | 4.23125700  | 1.06497600      | -0.46718600 |

|    |             |             |             |
|----|-------------|-------------|-------------|
| C  | 3.91528300  | -0.88708400 | 0.93243100  |
| H  | 2.87730600  | -0.98697400 | 0.59955900  |
| H  | 4.35604900  | -1.87088000 | 1.09012500  |
| H  | 3.90207900  | -0.34471800 | 1.88435300  |
| Ag | -1.22879300 | -1.88023200 | -0.15012300 |

---

|   | Route 8 | TS8-5       | HF=-909.6592462 |
|---|---------|-------------|-----------------|
| C |         | 3.69520400  | 0.02785000      |
| H |         | 3.91744500  | -0.90422700     |
| C |         | 2.43098300  | 0.46863900      |
| C |         | 2.01729500  | 1.80345000      |
| C |         | 2.92002700  | 2.30125300      |
| H |         | 3.90833100  | 2.55242500      |
| H |         | 2.49455600  | 3.20238600      |
| H |         | 3.02940400  | 1.53850100      |
| C |         | 1.84263300  | 2.86718600      |
| H |         | 1.28490500  | 2.47263300      |
| H |         | 1.33502500  | 3.75014900      |
| H |         | 2.82080100  | 3.17396200      |
| O |         | 0.74124100  | 1.51515000      |
| H |         | 4.52771000  | 0.60376200      |
| C |         | -0.08446100 | 0.61935700      |
| O |         | -0.53900100 | -0.36305400     |
| O |         | 1.33550900  | -0.14453900     |
| O |         | -0.89415700 | 1.16118000      |
| H |         | -0.53852800 | 2.01893800      |
| H |         | -2.78139700 | 1.24855200      |
| C |         | -4.53214600 | 0.54875900      |
| O |         | -5.69630600 | 0.75927400      |
| O |         | -3.69147100 | 1.56789400      |
| C |         | -3.91325900 | -0.83325300     |
| H |         | -2.96748500 | -0.86656300     |
| H |         | -4.61881200 | -1.55761300     |

|    |             |             |             |
|----|-------------|-------------|-------------|
| H  | -3.69740100 | -1.09420500 | -1.09014500 |
| Ag | 0.74428200  | -2.10479500 | 0.04353600  |

---

| Route 8 | CP8-7       | HF=-909.6825158 |             |
|---------|-------------|-----------------|-------------|
| C       | -0.20160100 | 2.27407900      | -1.72159300 |
| H       | -0.95037900 | 2.02179200      | -2.46427000 |
| C       | 0.30144500  | 1.31419100      | -0.92234300 |
| C       | 1.48642000  | 1.63030000      | 0.02021400  |
| C       | 2.80142600  | 1.50656400      | -0.75062800 |
| H       | 2.85852000  | 2.29531800      | -1.50357900 |
| H       | 3.65652400  | 1.59172100      | -0.07326000 |
| H       | 2.86109200  | 0.54149500      | -1.26628800 |
| C       | 1.39552500  | 2.97861200      | 0.72619300  |
| H       | 0.44608500  | 3.08797500      | 1.25000100  |
| H       | 2.21555300  | 3.07010700      | 1.44495900  |
| H       | 1.49262100  | 3.79118300      | 0.00246900  |
| O       | 1.61217000  | 0.55911100      | 1.02603200  |
| H       | 0.12086600  | 3.30598400      | -1.66077900 |
| C       | 0.53874200  | 0.04409600      | 1.62857100  |
| O       | 0.49036300  | -1.15761400     | 1.87615400  |
| O       | -0.15001800 | 0.05886200      | -0.92806200 |
| O       | -0.39910500 | 0.91531400      | 1.95292700  |
| H       | -1.25472500 | 0.43303300      | 1.95664200  |
| H       | -1.56738000 | -0.11200800     | -0.21724000 |
| C       | -3.54133200 | -0.00630300     | 0.06381400  |
| O       | -4.46816700 | -0.07421200     | 0.83425100  |
| O       | -2.28396600 | -0.26394100     | 0.47818800  |
| C       | -3.67185400 | 0.37016600      | -1.39474500 |
| H       | -3.20192000 | -0.38080100     | -2.03711700 |
| H       | -4.72638300 | 0.47032500      | -1.64943600 |
| H       | -3.15765800 | 1.31942800      | -1.57671100 |
| Ag      | 1.02434800  | -1.75331800     | -0.42591900 |

---

| Route 8 | TS8-6       | HF=-909.6732368 |             |
|---------|-------------|-----------------|-------------|
| C       | -0.46116300 | 2.32150000      | -1.62677800 |
| H       | -1.25771300 | 2.05428100      | -2.31226800 |
| C       | 0.19881500  | 1.37132200      | -0.95763800 |
| C       | 1.41739600  | 1.66996200      | -0.07115300 |
| C       | 2.69544600  | 1.52910200      | -0.90261400 |
| H       | 2.72594600  | 2.30921100      | -1.66666800 |
| H       | 3.57856900  | 1.61621500      | -0.26314900 |
| H       | 2.72824000  | 0.55801300      | -1.40976900 |
| C       | 1.36354600  | 3.02851400      | 0.61901400  |
| H       | 0.44578400  | 3.13128300      | 1.19847100  |
| H       | 2.22371300  | 3.12368000      | 1.28791500  |
| H       | 1.41815400  | 3.83729500      | -0.11407000 |
| O       | 1.57574300  | 0.62069800      | 0.94046000  |
| H       | -0.23689700 | 3.37286100      | -1.50135700 |
| C       | 0.48905500  | 0.11215700      | 1.57226900  |
| O       | 0.52801600  | -1.08874000     | 1.87322900  |
| O       | -0.15873300 | 0.05522700      | -1.07350700 |
| O       | -0.50612900 | 0.91388200      | 1.76517500  |
| H       | -1.38121800 | 0.41858100      | 1.37312400  |
| H       | -1.17108500 | -0.09357500     | -0.54814400 |
| C       | -3.38509100 | -0.01145600     | 0.11877800  |
| O       | -4.12535900 | 0.40978900      | 0.98094900  |
| O       | -2.08028600 | -0.20715500     | 0.32333000  |
| C       | -3.85657600 | -0.40447800     | -1.26710100 |
| H       | -3.74500000 | -1.48569500     | -1.40114400 |
| H       | -4.90468700 | -0.13283800     | -1.39227300 |
| H       | -3.25200700 | 0.08252500      | -2.03840900 |
| Ag      | 1.06794900  | -1.74725900     | -0.31059600 |

| Route 8 | CP8-8       | HF=-909.6983542 |            |
|---------|-------------|-----------------|------------|
| C       | -2.26326700 | -1.54784000     | 1.56816900 |

|    |             |             |             |
|----|-------------|-------------|-------------|
| H  | -1.79480800 | -2.51903300 | 1.69201500  |
| C  | -2.17331700 | -0.88122600 | 0.41910300  |
| C  | -2.82009100 | 0.45529900  | 0.04766100  |
| C  | -4.06096200 | 0.19899500  | -0.81552000 |
| H  | -4.82749600 | -0.31574300 | -0.23068900 |
| H  | -4.45894000 | 1.15378500  | -1.16905500 |
| H  | -3.81823900 | -0.41636500 | -1.68631500 |
| C  | -3.17982500 | 1.31070100  | 1.25595000  |
| H  | -2.33190400 | 1.45931300  | 1.92290600  |
| H  | -3.51545700 | 2.29141700  | 0.91316100  |
| H  | -3.99918500 | 0.83506300  | 1.80376500  |
| O  | -1.88444000 | 1.07479700  | -0.86911000 |
| H  | -2.82375800 | -1.14220600 | 2.39975800  |
| C  | -0.67223400 | 1.61242100  | -0.35592300 |
| O  | -0.68501300 | 2.48387800  | 0.48512400  |
| O  | -1.44893000 | -1.40259900 | -0.64631100 |
| O  | 0.33436900  | 1.05543500  | -0.94528400 |
| H  | 1.61948600  | 1.40981500  | -0.52062200 |
| H  | -1.42561000 | -0.65475900 | -1.28803000 |
| C  | 3.31952900  | 0.60712100  | 0.19767300  |
| O  | 2.91088300  | -0.56732900 | 0.32698100  |
| O  | 2.63808300  | 1.60697200  | -0.24819100 |
| C  | 4.73578500  | 0.94474600  | 0.58003200  |
| H  | 4.72785900  | 1.73353400  | 1.33734400  |
| H  | 5.25139100  | 0.06343900  | 0.95903300  |
| H  | 5.26127300  | 1.34172600  | -0.29318100 |
| Ag | 0.84898000  | -1.17979800 | -0.17124700 |

---

|   | Route 8 | TS8-7       | HF=-909.6754392 |            |
|---|---------|-------------|-----------------|------------|
| C |         | -2.66205000 | -2.09718100     | 1.01185600 |
| H |         | -2.27178100 | -3.10759100     | 0.95367200 |
| C |         | -2.21373400 | -1.13979800     | 0.18711800 |
| C |         | -2.76780400 | 0.31475500      | 0.19333400 |

|    |             |             |             |
|----|-------------|-------------|-------------|
| C  | -4.20228600 | 0.37234300  | -0.32513900 |
| H  | -4.86829400 | -0.17933000 | 0.34406300  |
| H  | -4.54195800 | 1.41075700  | -0.38940900 |
| H  | -4.26557100 | -0.08015700 | -1.31814800 |
| C  | -2.63493800 | 0.97715400  | 1.55841900  |
| H  | -1.60695600 | 0.92437900  | 1.92980400  |
| H  | -2.94062800 | 2.02533300  | 1.51976800  |
| H  | -3.27038700 | 0.45225600  | 2.27589200  |
| O  | -1.93521700 | 0.98544000  | -0.80339800 |
| H  | -3.43804000 | -1.89440500 | 1.74112000  |
| C  | -0.61058500 | 2.12751900  | -0.36905900 |
| O  | -1.08813000 | 3.12907200  | 0.03869300  |
| O  | -1.29263300 | -1.29550800 | -0.77838000 |
| O  | 0.40282900  | 1.52180400  | -0.67424300 |
| H  | 1.98529100  | 1.56197300  | -0.18873600 |
| H  | -1.46034200 | 0.12569400  | -1.15383600 |
| C  | 3.46433600  | 0.40755500  | 0.30174200  |
| O  | 2.85352700  | -0.66562200 | 0.24120400  |
| O  | 2.94864400  | 1.58771800  | 0.06651800  |
| C  | 4.91937500  | 0.45713800  | 0.66122200  |
| H  | 5.06677800  | 1.13222200  | 1.50841600  |
| H  | 5.28049600  | -0.54103300 | 0.90293800  |
| H  | 5.48515400  | 0.86631900  | -0.18103300 |
| Ag | 0.76553600  | -1.13439500 | -0.25499200 |

---

|   | Route 8 | CP8-9       | HF=-909.6990907 |             |
|---|---------|-------------|-----------------|-------------|
| C |         | -1.78350300 | -1.20646200     | 1.79965200  |
| H |         | -0.95698400 | -1.82688700     | 2.14108800  |
| C |         | -1.92646700 | -0.91966000     | 0.49151500  |
| C |         | -3.08844900 | -0.09733500     | -0.08908100 |
| C |         | -4.03467700 | -1.02935700     | -0.85846300 |
| H |         | -4.53531600 | -1.72770600     | -0.18003000 |
| H |         | -4.79118500 | -0.43900300     | -1.38529900 |

|    |             |             |             |
|----|-------------|-------------|-------------|
| H  | -3.46786400 | -1.61130200 | -1.59056300 |
| C  | -3.85492800 | 0.73088200  | 0.93065400  |
| H  | -3.18161100 | 1.36401400  | 1.51311500  |
| H  | -4.56969900 | 1.37479900  | 0.40909600  |
| H  | -4.41243200 | 0.08734800  | 1.61669800  |
| O  | -2.48894400 | 0.81999100  | -1.02081500 |
| H  | -2.49666700 | -0.87017700 | 2.54173500  |
| C  | -0.70748800 | 2.64609200  | -0.08683400 |
| O  | -1.53152200 | 3.33848600  | 0.34904300  |
| O  | -1.10880600 | -1.30173800 | -0.49594900 |
| O  | 0.20276400  | 2.02744300  | -0.50065300 |
| H  | 2.06997400  | 1.51598500  | -0.17954600 |
| H  | -1.79642900 | 0.25881400  | -1.41632600 |
| C  | 3.61951800  | 0.42391200  | 0.09718500  |
| O  | 3.02915700  | -0.65622000 | 0.07275700  |
| O  | 3.03528700  | 1.59782600  | -0.04439300 |
| C  | 5.09929600  | 0.52205700  | 0.29676400  |
| H  | 5.30729100  | 1.10621700  | 1.19784800  |
| H  | 5.52820200  | -0.47418200 | 0.38814100  |
| H  | 5.54908100  | 1.05383200  | -0.54624900 |
| Ag | 0.90873000  | -1.12423000 | -0.14634000 |

---

|   | Route 8 | TS8-8      | HF=-721.1213929 |             |
|---|---------|------------|-----------------|-------------|
| C |         | 1.08032200 | 0.89958100      | 0.83971000  |
| C |         | 2.05061100 | 0.26442400      | -0.19909600 |
| C |         | 2.93679400 | 1.25709200      | -0.94525500 |
| H |         | 3.59397800 | 1.79248700      | -0.25428600 |
| H |         | 3.55728300 | 0.71833200      | -1.66730300 |
| H |         | 2.34229000 | 1.99687300      | -1.49047100 |
| C |         | 2.89392400 | -0.80476300     | 0.48414700  |
| H |         | 2.25482700 | -1.49050200     | 1.04648300  |
| H |         | 3.46366700 | -1.36727600     | -0.26132500 |
| H |         | 3.59235800 | -0.34177000     | 1.18701400  |

|    |             |             |             |
|----|-------------|-------------|-------------|
| O  | 0.32775800  | 0.07958900  | 1.48008800  |
| C  | -2.04059000 | 1.08297500  | -0.47063100 |
| O  | -2.46105900 | -0.04845200 | -0.70923700 |
| C  | -2.76903800 | 2.04278300  | 0.42903800  |
| H  | -2.84302100 | 3.03005400  | -0.03336000 |
| H  | -3.75827400 | 1.65540800  | 0.67065000  |
| H  | -2.18758500 | 2.14899500  | 1.35183000  |
| O  | -0.90375200 | 1.51453500  | -1.00282900 |
| C  | 0.94967600  | 2.27708600  | 0.93128500  |
| H  | -0.29250200 | 2.02213900  | -0.31576200 |
| H  | 0.34740200  | 2.67480000  | 1.74504900  |
| H  | 1.68745000  | 2.94443000  | 0.50129400  |
| O  | 1.24565300  | -0.44042200 | -1.18702700 |
| H  | 0.65168700  | 0.22213000  | -1.58063300 |
| Ag | -0.61039500 | -1.42474800 | 0.08590800  |

---

| Route 8 | CP8-10      | HF=-721.169758 |             |
|---------|-------------|----------------|-------------|
| C       | -2.22582400 | -0.38552200    | -0.42925700 |
| C       | -1.88106700 | 0.92276000     | 0.31488900  |
| C       | -1.83448400 | 2.07852700     | -0.69737900 |
| H       | -2.78230300 | 2.20190400     | -1.22886900 |
| H       | -1.62089500 | 3.00473300     | -0.15660900 |
| H       | -1.03272800 | 1.92410600     | -1.42551200 |
| C       | -2.96165700 | 1.16361400     | 1.38497600  |
| H       | -2.98979400 | 0.32905100     | 2.09168200  |
| H       | -2.68478900 | 2.06373700     | 1.93925900  |
| H       | -3.95917300 | 1.30767700     | 0.96262900  |
| O       | -1.49105800 | -1.36936700    | -0.41248400 |
| C       | 2.58361400  | 0.88757600     | -0.22170500 |
| O       | 2.69253800  | -0.36707600    | -0.00774900 |
| C       | 3.88741700  | 1.63670500     | -0.43239200 |
| H       | 4.25056000  | 1.98622500     | 0.54026900  |
| H       | 4.64869300  | 0.98414600     | -0.86293000 |

|    |             |             |             |
|----|-------------|-------------|-------------|
| H  | 3.72452800  | 2.51125200  | -1.06481300 |
| O  | 1.51230600  | 1.54426400  | -0.25011200 |
| O  | -0.66706600 | 0.79975300  | 1.00219900  |
| H  | 0.11063900  | 1.18010500  | 0.49094600  |
| Ag | 0.70119400  | -1.18870700 | 0.17706900  |
| C  | -3.49978900 | -0.46961000 | -1.23190600 |
| H  | -4.28968800 | 0.18830900  | -0.86805700 |
| H  | -3.26770000 | -0.17256200 | -2.26202900 |
| H  | -3.84648900 | -1.50437000 | -1.25642700 |

---

| Route 9 | CP9-1       | HF=-1177.2536983 |             |
|---------|-------------|------------------|-------------|
| C       | -4.56973500 | -1.98574200      | 0.15968800  |
| C       | -5.01319000 | -0.77283800      | -0.25959100 |
| C       | -2.79294900 | -0.59401500      | 0.10416700  |
| N       | -3.21133100 | -1.85391200      | 0.37489000  |
| H       | -5.09484300 | -2.91628800      | 0.30981600  |
| H       | -6.00050300 | -0.44414900      | -0.54490600 |
| N       | -3.91279000 | 0.06068800       | -0.28959700 |
| C       | -3.95105000 | 1.47834900       | -0.65695400 |
| H       | -4.53990800 | 1.56747100       | -1.57581600 |
| H       | -2.92407200 | 1.77715400       | -0.88576500 |
| C       | -4.52582200 | 2.34882900       | 0.45241000  |
| H       | -4.52751900 | 3.39486200       | 0.13332600  |
| H       | -5.55374000 | 2.06644700       | 0.70173400  |
| H       | -3.91518000 | 2.27083300       | 1.35624900  |
| C       | -2.34446000 | -2.92268300      | 0.84163900  |
| H       | -2.51165000 | -3.82343000      | 0.24611500  |
| H       | -1.30924500 | -2.60441000      | 0.72054900  |
| H       | -2.53957500 | -3.14158800      | 1.89532600  |
| C       | 0.78038900  | 2.40710300       | -0.35509400 |
| O       | -0.32396500 | 2.71189700       | -0.82610100 |
| O       | 0.99991400  | 1.29960100       | 0.28868700  |
| C       | 1.96710200  | 3.34188900       | -0.47468400 |
| H       | 2.85328000  | 2.79500900       | -0.80796000 |

|    |             |             |             |
|----|-------------|-------------|-------------|
| H  | 1.74209500  | 4.15816800  | -1.16208500 |
| H  | 2.19642400  | 3.75962200  | 0.51157100  |
| Ag | -0.89477400 | 0.28639100  | 0.20084600  |
| C  | 5.25094400  | 1.09783700  | -1.28300300 |
| H  | 5.67871100  | 1.63006200  | -2.10170300 |
| C  | 4.76261300  | 0.48177300  | -0.36310800 |
| C  | 4.16998900  | -0.27058300 | 0.76703100  |
| O  | 2.84894100  | -0.67804200 | 0.45874400  |
| C  | 4.97585300  | -1.55315800 | 0.99728300  |
| H  | 6.01574200  | -1.32286800 | 1.24392100  |
| H  | 4.52654800  | -2.11133800 | 1.82443600  |
| H  | 4.95433700  | -2.17440500 | 0.09928000  |
| C  | 4.17201400  | 0.60945300  | 2.02682400  |
| H  | 3.54791600  | 1.49310800  | 1.86985000  |
| H  | 3.75755900  | 0.03669700  | 2.86213200  |
| H  | 5.18405000  | 0.93644500  | 2.28401800  |
| C  | 1.94909600  | -2.57053300 | -1.36784900 |
| O  | 2.99135900  | -2.71867700 | -1.86995000 |
| O  | 0.87340700  | -2.48369900 | -0.91613000 |
| H  | 2.28078800  | 0.12204800  | 0.36853300  |

---

| Route 9 | TS9-1       | HF=-1177.2351839 |             |
|---------|-------------|------------------|-------------|
| C       | -4.38344000 | -1.52940600      | -0.10596000 |
| C       | -4.58387100 | -0.21246400      | 0.15291200  |
| C       | -2.36474000 | -0.50998000      | -0.15570600 |
| N       | -3.02305700 | -1.68926200      | -0.28897400 |
| H       | -5.08161600 | -2.34861700      | -0.18151000 |
| H       | -5.49147600 | 0.33619500       | 0.35193600  |
| N       | -3.34157800 | 0.39088800       | 0.11415600  |
| C       | -3.10376500 | 1.80788600       | 0.38891800  |
| H       | -3.85453900 | 2.38298700       | -0.16351700 |
| H       | -2.12156600 | 2.05570100       | -0.01961500 |
| C       | -3.15909000 | 2.12329000       | 1.87826300  |
| H       | -2.97186600 | 3.18923300       | 2.03697500  |

|    |             |             |             |
|----|-------------|-------------|-------------|
| H  | -4.13551400 | 1.88169500  | 2.31031600  |
| H  | -2.39333700 | 1.55837400  | 2.41713400  |
| C  | -2.38462600 | -2.95361400 | -0.61047500 |
| H  | -2.70244000 | -3.30273600 | -1.59680200 |
| H  | -1.30516400 | -2.79988300 | -0.61566700 |
| H  | -2.63854100 | -3.70516200 | 0.14172100  |
| Ag | -0.29025600 | -0.14090200 | -0.40097300 |
| C  | 2.32797100  | -0.92344700 | -1.54483400 |
| O  | 1.34398800  | -0.60099700 | -2.18602600 |
| O  | 3.37897300  | -1.49104800 | -1.59112400 |
| H  | 2.23048700  | 1.28659000  | -0.12664200 |
| C  | 2.32191000  | -2.26314000 | 1.24790600  |
| C  | 2.60913600  | -0.81767800 | 1.19650300  |
| O  | 2.00235500  | -0.24979700 | 0.02591400  |
| C  | 1.95718500  | -0.13948200 | 2.41152600  |
| H  | 2.36888300  | -0.54057200 | 3.34222200  |
| H  | 2.14969400  | 0.93698100  | 2.37683800  |
| H  | 0.87596000  | -0.30708600 | 2.40738400  |
| C  | 4.12460800  | -0.56732500 | 1.20001300  |
| H  | 4.58203900  | -1.02688200 | 0.32479600  |
| H  | 4.31136000  | 0.51107000  | 1.17800500  |
| H  | 4.57586300  | -0.98175700 | 2.10652800  |
| C  | 1.26889600  | 2.94802400  | -0.36454000 |
| O  | 0.15530400  | 2.43031700  | -0.34505900 |
| O  | 2.39867500  | 2.28900800  | -0.22863000 |
| C  | 1.47487300  | 4.42821100  | -0.55825800 |
| H  | 1.99349100  | 4.59819600  | -1.50674700 |
| H  | 0.51542000  | 4.94435600  | -0.56778000 |
| H  | 2.11357900  | 4.82604900  | 0.23488300  |
| C  | 2.07100200  | -3.44298400 | 1.33536300  |
| H  | 1.88311600  | -4.49095000 | 1.38862000  |

---



---

Route 9

CP9-2

HF=-1177.2420957

---

C

-3.93148900

-2.51598200

0.35983200

|    |             |             |             |
|----|-------------|-------------|-------------|
| C  | -4.35651000 | -1.30591700 | -0.08492600 |
| C  | -2.10621200 | -1.23193900 | 0.01154600  |
| N  | -2.55286800 | -2.44927300 | 0.41328200  |
| H  | -4.48224000 | -3.40182700 | 0.63584100  |
| H  | -5.35233600 | -0.93344500 | -0.26759300 |
| N  | -3.22898700 | -0.53821300 | -0.29169200 |
| C  | -3.25809600 | 0.86768000  | -0.71488600 |
| H  | -3.82150900 | 0.92265100  | -1.65245400 |
| H  | -2.22829800 | 1.16483900  | -0.92396600 |
| C  | -3.85329400 | 1.78354900  | 0.34432800  |
| H  | -3.70547100 | 2.82024400  | 0.03246900  |
| H  | -4.92141800 | 1.59989900  | 0.50079000  |
| H  | -3.33355800 | 1.65146800  | 1.29769500  |
| C  | -1.70189700 | -3.53501300 | 0.86434300  |
| H  | -1.82741400 | -4.41112500 | 0.22172400  |
| H  | -0.66500600 | -3.20017600 | 0.82239500  |
| H  | -1.94674800 | -3.80560200 | 1.89496300  |
| C  | -0.49716900 | 3.70096900  | -0.19238600 |
| O  | -1.58918000 | 4.22534400  | -0.25796200 |
| O  | -0.29035900 | 2.49954500  | -0.75795000 |
| C  | 0.70618500  | 4.32450700  | 0.47129200  |
| H  | 1.42696500  | 4.62435500  | -0.29802700 |
| H  | 0.39584500  | 5.20810800  | 1.02870000  |
| H  | 1.21195200  | 3.60503200  | 1.12563100  |
| Ag | -0.13058400 | -0.50838200 | -0.13659700 |
| C  | 1.73320900  | -2.61223700 | -0.97895200 |
| H  | 1.02879500  | -3.31761100 | -1.35731300 |
| C  | 2.57236500  | -1.82611000 | -0.59306200 |
| C  | 3.69419600  | -0.95915600 | -0.17530900 |
| O  | 3.35731000  | -0.10923000 | 0.92992700  |
| C  | 4.80529700  | -1.85765200 | 0.38581500  |
| H  | 5.15295500  | -2.56083400 | -0.37527200 |
| H  | 5.64079100  | -1.22936600 | 0.70535000  |
| H  | 4.43917500  | -2.41709900 | 1.24957200  |

|   |            |             |             |
|---|------------|-------------|-------------|
| C | 4.20979000 | -0.14243900 | -1.36660000 |
| H | 3.41810700 | 0.49294400  | -1.76363200 |
| H | 5.04205200 | 0.48212700  | -1.02863100 |
| H | 4.56710700 | -0.80776600 | -2.15770600 |
| C | 2.38494600 | 0.87192500  | 0.82991400  |
| O | 1.61893800 | 0.80518300  | -0.21766700 |
| O | 2.35125700 | 1.68819800  | 1.73145200  |
| H | 0.57902800 | 2.07412200  | -0.50971800 |

|         |       |                  |  |
|---------|-------|------------------|--|
| Route 9 | CP9-2 | HF=-1177.2420957 |  |
|---------|-------|------------------|--|

|   |             |             |             |
|---|-------------|-------------|-------------|
| C | -3.93148900 | -2.51598200 | 0.35983200  |
| C | -4.35651000 | -1.30591700 | -0.08492600 |
| C | -2.10621200 | -1.23193900 | 0.01154600  |
| N | -2.55286800 | -2.44927300 | 0.41328200  |
| H | -4.48224000 | -3.40182700 | 0.63584100  |
| H | -5.35233600 | -0.93344500 | -0.26759300 |
| N | -3.22898700 | -0.53821300 | -0.29169200 |
| C | -3.25809600 | 0.86768000  | -0.71488600 |
| H | -3.82150900 | 0.92265100  | -1.65245400 |
| H | -2.22829800 | 1.16483900  | -0.92396600 |
| C | -3.85329400 | 1.78354900  | 0.34432800  |
| H | -3.70547100 | 2.82024400  | 0.03246900  |
| H | -4.92141800 | 1.59989900  | 0.50079000  |
| H | -3.33355800 | 1.65146800  | 1.29769500  |
| C | -1.70189700 | -3.53501300 | 0.86434300  |
| H | -1.82741400 | -4.41112500 | 0.22172400  |
| H | -0.66500600 | -3.20017600 | 0.82239500  |
| H | -1.94674800 | -3.80560200 | 1.89496300  |
| C | -0.49716900 | 3.70096900  | -0.19238600 |
| O | -1.58918000 | 4.22534400  | -0.25796200 |
| O | -0.29035900 | 2.49954500  | -0.75795000 |
| C | 0.70618500  | 4.32450700  | 0.47129200  |
| H | 1.42696500  | 4.62435500  | -0.29802700 |
| H | 0.39584500  | 5.20810800  | 1.02870000  |

|    |             |             |             |
|----|-------------|-------------|-------------|
| H  | 1.21195200  | 3.60503200  | 1.12563100  |
| Ag | -0.13058400 | -0.50838200 | -0.13659700 |
| C  | 1.73320900  | -2.61223700 | -0.97895200 |
| H  | 1.02879500  | -3.31761100 | -1.35731300 |
| C  | 2.57236500  | -1.82611000 | -0.59306200 |
| C  | 3.69419600  | -0.95915600 | -0.17530900 |
| O  | 3.35731000  | -0.10923000 | 0.92992700  |
| C  | 4.80529700  | -1.85765200 | 0.38581500  |
| H  | 5.15295500  | -2.56083400 | -0.37527200 |
| H  | 5.64079100  | -1.22936600 | 0.70535000  |
| H  | 4.43917500  | -2.41709900 | 1.24957200  |
| C  | 4.20979000  | -0.14243900 | -1.36660000 |
| H  | 3.41810700  | 0.49294400  | -1.76363200 |
| H  | 5.04205200  | 0.48212700  | -1.02863100 |
| H  | 4.56710700  | -0.80776600 | -2.15770600 |
| C  | 2.38494600  | 0.87192500  | 0.82991400  |
| O  | 1.61893800  | 0.80518300  | -0.21766700 |
| O  | 2.35125700  | 1.68819800  | 1.73145200  |
| H  | 0.57902800  | 2.07412200  | -0.50971800 |

---

| Route 9 | TS9-2       | HF=-1177.2266826 |             |
|---------|-------------|------------------|-------------|
| C       | -4.69557700 | 0.20559100       | 0.06326100  |
| C       | -4.08533900 | 0.44093200       | 1.25311600  |
| C       | -2.50507700 | -0.29217400      | -0.17635700 |
| N       | -3.71139400 | -0.24408400      | -0.79582000 |
| H       | -5.72376600 | 0.32541400       | -0.24097100 |
| H       | -4.48215200 | 0.80165600       | 2.18940200  |
| N       | -2.75120500 | 0.13492300       | 1.08449300  |
| C       | -1.74389400 | 0.21309200       | 2.15032700  |
| H       | -1.92374900 | 1.14079300       | 2.70152700  |
| H       | -0.76506100 | 0.30234000       | 1.67682300  |
| C       | -1.77364100 | -0.99472200      | 3.07438500  |
| H       | -0.94864000 | -0.90893800      | 3.78533000  |
| H       | -2.71694400 | -1.07092000      | 3.62544000  |

|    |             |             |             |
|----|-------------|-------------|-------------|
| H  | -1.62969000 | -1.91767000 | 2.50460800  |
| C  | -3.93987700 | -0.59440900 | -2.18492300 |
| H  | -4.28131000 | 0.27826600  | -2.74868100 |
| H  | -2.99793900 | -0.94692600 | -2.60634000 |
| H  | -4.68729000 | -1.38911800 | -2.25875600 |
| Ag | -0.60453100 | -0.87824400 | -0.91678800 |
| H  | 0.90498300  | 1.70292900  | 0.29771100  |
| C  | 1.35892200  | 3.42317700  | -0.43085600 |
| O  | 2.49749000  | 3.12040300  | -0.73111400 |
| O  | 0.48437700  | 2.59755700  | 0.14234900  |
| C  | 0.76659900  | 4.79302200  | -0.66173700 |
| H  | 0.47630900  | 5.23683500  | 0.29535500  |
| H  | 1.49633100  | 5.43119400  | -1.15907500 |
| H  | -0.13914700 | 4.71400400  | -1.27014500 |
| C  | 1.26461700  | -1.74802300 | -1.69272800 |
| H  | 1.16390100  | -2.44783000 | -2.50469200 |
| C  | 2.12913100  | -1.35074100 | -0.88436300 |
| C  | 3.36207000  | -1.17638300 | -0.07517000 |
| O  | 3.01907300  | -1.08847600 | 1.30649400  |
| C  | 4.18806600  | -2.46257800 | -0.22064800 |
| H  | 4.47930700  | -2.62232900 | -1.26205600 |
| H  | 5.09229600  | -2.36443600 | 0.38573100  |
| H  | 3.61970500  | -3.32532100 | 0.13384800  |
| C  | 4.15909700  | 0.05380200  | -0.51673600 |
| H  | 3.55691900  | 0.96228000  | -0.45279100 |
| H  | 5.03233200  | 0.15059000  | 0.13509300  |
| H  | 4.50477500  | -0.06464800 | -1.54836100 |
| C  | 1.90319800  | -0.30829700 | 1.58034800  |
| O  | 1.32554700  | 0.12153000  | 0.50489600  |
| O  | 1.58478600  | -0.14605100 | 2.74259900  |

---

| Route 9 | CP9-3       | HF=-1177.2553664 |            |
|---------|-------------|------------------|------------|
| C       | -4.75330500 | -1.51777000      | 0.18708200 |
| C       | -4.75523400 | -0.18180500      | 0.42876500 |

|    |             |             |             |
|----|-------------|-------------|-------------|
| C  | -2.66302500 | -0.74841000 | -0.20568400 |
| N  | -3.46682100 | -1.84200400 | -0.19809900 |
| H  | -5.54482700 | -2.24850300 | 0.24896000  |
| H  | -5.55038800 | 0.47506400  | 0.74564500  |
| N  | -3.47399800 | 0.26728400  | 0.18123400  |
| C  | -3.03989900 | 1.65869500  | 0.33877500  |
| H  | -3.74790900 | 2.29318900  | -0.20434900 |
| H  | -2.06943300 | 1.74073200  | -0.15206200 |
| C  | -2.91504400 | 2.08813100  | 1.79244000  |
| H  | -2.49931300 | 3.09843700  | 1.82289600  |
| H  | -3.88048200 | 2.08502300  | 2.30868300  |
| H  | -2.22785600 | 1.42787200  | 2.32810600  |
| C  | -3.03554200 | -3.17977900 | -0.56141000 |
| H  | -3.61451300 | -3.54810100 | -1.41269000 |
| H  | -1.98188500 | -3.13481100 | -0.83828000 |
| H  | -3.15798700 | -3.86326300 | 0.28331600  |
| C  | 0.44806200  | 3.46634500  | -0.18403000 |
| O  | -0.31768400 | 4.33785900  | 0.15767600  |
| O  | 0.36732800  | 2.24470100  | 0.38063000  |
| C  | 1.53232400  | 3.64228300  | -1.22169200 |
| H  | 1.40409800  | 2.92383500  | -2.03772300 |
| H  | 1.49492400  | 4.65683200  | -1.61663000 |
| H  | 2.51659700  | 3.45622400  | -0.78013900 |
| Ag | -0.59405300 | -0.57256800 | -0.66841000 |
| C  | 1.41981800  | -0.21751000 | -1.12485600 |
| H  | 1.65539700  | 0.18917400  | -2.11277600 |
| C  | 2.51851400  | -0.50812400 | -0.42440000 |
| C  | 2.70122300  | -1.14165600 | 0.94830000  |
| O  | 4.14196700  | -1.12717700 | 1.11056100  |
| C  | 2.09291000  | -0.32490700 | 2.08099800  |
| H  | 1.00766100  | -0.27290400 | 1.95906400  |
| H  | 2.31992700  | -0.78808600 | 3.04582100  |
| H  | 2.48756300  | 0.69411400  | 2.08027800  |
| C  | 2.24375500  | -2.59705500 | 0.97869800  |

|   |            |             |             |
|---|------------|-------------|-------------|
| H | 2.72711800 | -3.16860900 | 0.18196800  |
| H | 2.49235400 | -3.05234500 | 1.94213300  |
| H | 1.16148600 | -2.64246400 | 0.82797100  |
| C | 4.74082100 | -0.63593200 | 0.00940300  |
| O | 3.80885100 | -0.27632900 | -0.91350300 |
| O | 5.92234500 | -0.52507100 | -0.14396700 |
| H | 0.91899200 | 1.56539900  | -0.07239200 |

---

|   | Route 9 | TS9-3       | HF=-1177.2373547 |
|---|---------|-------------|------------------|
| C |         | -4.42636900 | -2.11815300      |
| C |         | -4.66663800 | -0.80410600      |
| C |         | -2.48966800 | -0.99678800      |
| N |         | -3.08921000 | -2.21377800      |
| H |         | -5.08232200 | -2.97441400      |
| H |         | -5.57473200 | -0.29594300      |
| N |         | -3.47467100 | -0.13756300      |
| C |         | -3.29672800 | 1.30796100       |
| H |         | -4.11236900 | 1.81247500       |
| H |         | -2.36310900 | 1.60120400       |
| C |         | -3.25144800 | 1.71269100       |
| H |         | -3.01660200 | 2.77845300       |
| H |         | -4.20038800 | 1.52948700       |
| H |         | -2.45812200 | 1.17065400       |
| C |         | -2.42013100 | -3.45450000      |
| H |         | -2.88977600 | -3.90940400      |
| H |         | -1.37860400 | -3.22779500      |
| H |         | -2.45989300 | -4.15600300      |
| C |         | -0.15671100 | 3.27783800       |
| O |         | -1.24877600 | 3.79167400       |
| O |         | 0.20535700  | 2.12872800       |
| C |         | 0.87786600  | 3.94571700       |
| H |         | 1.18696600  | 3.26733400       |
| H |         | 0.47069800  | 4.86144600       |
| H |         | 1.77498400  | 4.18203500       |

|    |             |             |             |
|----|-------------|-------------|-------------|
| Ag | -0.48168900 | -0.44480100 | -0.55287100 |
| C  | 1.55201300  | 0.24365500  | -1.08414900 |
| H  | 1.67933000  | 0.18562700  | -2.16811800 |
| C  | 2.60681500  | -0.25402500 | -0.41262300 |
| C  | 2.91694300  | -0.24855900 | 1.07803300  |
| O  | 4.18990800  | -0.94529000 | 1.12648300  |
| C  | 3.12399000  | 1.17011900  | 1.60146800  |
| H  | 2.19136800  | 1.73310000  | 1.50988900  |
| H  | 3.43345700  | 1.13951300  | 2.65008900  |
| H  | 3.89889300  | 1.68075500  | 1.02317000  |
| C  | 1.92470000  | -1.03523200 | 1.92315900  |
| H  | 1.80459400  | -2.05146800 | 1.53815800  |
| H  | 2.27784800  | -1.08913000 | 2.95703600  |
| H  | 0.95358700  | -0.53239900 | 1.91106700  |
| C  | 4.62508100  | -1.22747000 | -0.11011200 |
| O  | 3.70406900  | -0.80481100 | -1.03748600 |
| O  | 5.65105500  | -1.76933800 | -0.39080500 |
| H  | 0.91953900  | 1.33690100  | -0.50279400 |

---

| Route 9 | CP9-4       | HF=-1177.283321 |             |
|---------|-------------|-----------------|-------------|
| C       | -3.26404200 | -3.21614200     | -0.16222300 |
| C       | -4.25133400 | -2.31922300     | 0.09107200  |
| C       | -2.33307600 | -1.15912800     | -0.16903800 |
| N       | -2.10094600 | -2.48639900     | -0.31647000 |
| H       | -3.29221900 | -4.29111100     | -0.25105300 |
| H       | -5.30566600 | -2.46463400     | 0.26845600  |
| N       | -3.66269400 | -1.07033800     | 0.07938100  |
| C       | -4.36585700 | 0.18480200      | 0.35486400  |
| H       | -5.29031600 | 0.18375900      | -0.23191200 |
| H       | -3.73106900 | 0.99335000      | -0.01788400 |
| C       | -4.65337400 | 0.37543100      | 1.83802200  |
| H       | -5.17304300 | 1.32541000      | 1.99089500  |
| H       | -5.28251600 | -0.42605700     | 2.23806200  |
| H       | -3.72092700 | 0.40353000      | 2.40850800  |

|    |             |             |             |
|----|-------------|-------------|-------------|
| C  | -0.80162100 | -3.06758500 | -0.60897200 |
| H  | -0.83281700 | -3.60618700 | -1.55986400 |
| H  | -0.07117900 | -2.26059700 | -0.67719800 |
| H  | -0.50601600 | -3.75536400 | 0.18769100  |
| C  | -0.50109200 | 3.17314200  | -0.28434100 |
| O  | -1.72910500 | 3.05834500  | -0.14312700 |
| O  | 0.30793600  | 2.16923900  | -0.39595100 |
| C  | 0.15071200  | 4.54340400  | -0.33271300 |
| H  | 0.71566500  | 4.65291600  | -1.26333900 |
| H  | -0.59953000 | 5.33147700  | -0.26165500 |
| H  | 0.86502500  | 4.64152000  | 0.49073200  |
| Ag | -1.03631800 | 0.48268000  | -0.28688500 |
| C  | 2.17760700  | -0.20314600 | -1.61675900 |
| H  | 1.99094300  | -0.88882700 | -2.43578400 |
| C  | 3.06320400  | -0.50415000 | -0.67196000 |
| C  | 3.51463200  | 0.30085000  | 0.53257800  |
| O  | 4.57444400  | -0.54451800 | 1.06087000  |
| C  | 4.11012500  | 1.64835500  | 0.14873300  |
| H  | 3.32004100  | 2.28263500  | -0.26177500 |
| H  | 4.53130000  | 2.13670100  | 1.03210000  |
| H  | 4.89807600  | 1.52910300  | -0.59917900 |
| C  | 2.43293200  | 0.43690400  | 1.59739700  |
| H  | 2.02776200  | -0.54306600 | 1.86581600  |
| H  | 2.85494600  | 0.89707600  | 2.49584600  |
| H  | 1.62727300  | 1.06986900  | 1.21249200  |
| C  | 4.66844200  | -1.68813400 | 0.36718100  |
| O  | 3.76631100  | -1.68886700 | -0.66629800 |
| O  | 5.41724500  | -2.59121500 | 0.59282600  |
| H  | 1.64851900  | 0.74353600  | -1.57734400 |

---

| Route 9 | CP9-5       | HF=-1253.6974148 |            |
|---------|-------------|------------------|------------|
| C       | -3.95991100 | -1.21071700      | 1.94306400 |
| H       | -3.48077300 | -1.32017100      | 2.90828400 |
| C       | -3.30927900 | -1.48142500      | 0.81885900 |

|   |             |             |             |
|---|-------------|-------------|-------------|
| C | -3.76734600 | -1.39752200 | -0.62556400 |
| C | -4.90151400 | -2.36596900 | -0.94012100 |
| H | -5.80679600 | -2.06321200 | -0.40673100 |
| H | -5.11185500 | -2.35905700 | -2.01329600 |
| H | -4.64493700 | -3.38431500 | -0.63624400 |
| C | -4.05222300 | 0.02984100  | -1.07220900 |
| H | -3.17081200 | 0.64950700  | -0.88219800 |
| H | -4.29559900 | 0.04427800  | -2.13883100 |
| H | -4.90482900 | 0.42843200  | -0.51424800 |
| O | -2.57980200 | -1.86194200 | -1.32757800 |
| H | -4.98203100 | -0.85438600 | 1.90976100  |
| C | -1.59105600 | -2.10978600 | -0.46879700 |
| O | -0.48453100 | -2.47634300 | -0.76233500 |
| O | -2.00849600 | -1.93470200 | 0.81511600  |
| C | 5.12658200  | -0.18255300 | -0.46975300 |
| C | 4.77715400  | -1.43431200 | -0.07792900 |
| C | 2.88237600  | -0.21595000 | -0.20739200 |
| N | 3.95490100  | 0.54559800  | -0.54077900 |
| H | 6.08997800  | 0.24082300  | -0.70783500 |
| H | 5.37962900  | -2.31235500 | 0.09620600  |
| N | 3.40487100  | -1.43407200 | 0.07200800  |
| C | 2.62336400  | -2.58225900 | 0.53653300  |
| H | 3.04153500  | -3.47495700 | 0.06035200  |
| H | 1.60419100  | -2.45694200 | 0.16287300  |
| C | 2.63724600  | -2.71179000 | 2.05409700  |
| H | 2.04216300  | -3.57918600 | 2.35400400  |
| H | 3.65239900  | -2.84318300 | 2.44248700  |
| H | 2.20111700  | -1.82330600 | 2.51962700  |
| C | 3.88330000  | 1.94124700  | -0.93709200 |
| H | 4.23424800  | 2.06364600  | -1.96539500 |
| H | 2.84337600  | 2.26286600  | -0.87237400 |
| H | 4.49185300  | 2.55579200  | -0.26839600 |
| C | -1.35409600 | 3.96137500  | 0.51174200  |
| O | -1.47041400 | 3.35322800  | 1.57218700  |

|    |             |            |             |
|----|-------------|------------|-------------|
| O  | -1.15804000 | 3.39445400 | -0.65720100 |
| C  | -1.43564300 | 5.47208700 | 0.43499300  |
| H  | -2.29087500 | 5.76319100 | -0.18291300 |
| H  | -1.54323700 | 5.89453900 | 1.43427700  |
| H  | -0.54023900 | 5.87373600 | -0.04864500 |
| Ag | 0.87599300  | 0.36616200 | -0.12508600 |
| O  | -1.10089700 | 1.00642300 | -0.07063700 |
| H  | -1.13011400 | 2.32329800 | -0.49383000 |
| H  | -1.30475800 | 1.25810900 | 0.84449100  |

---

| Route 9 | TS9-4       | HF=-1253.6826256 |             |
|---------|-------------|------------------|-------------|
| C       | -4.57075600 | -2.15632400      | 1.60826100  |
| H       | -4.15804900 | -2.98013000      | 2.17842900  |
| C       | -3.84465700 | -1.52412500      | 0.68800000  |
| C       | -4.24006700 | -0.35968900      | -0.20849200 |
| C       | -5.35500900 | -0.73291600      | -1.18168600 |
| H       | -6.28555100 | -0.92459400      | -0.63971300 |
| H       | -5.52437200 | 0.08589700       | -1.88735300 |
| H       | -5.08681000 | -1.63036500      | -1.74419600 |
| C       | -4.56806000 | 0.90244300       | 0.58583900  |
| H       | -3.71626500 | 1.18490200       | 1.20728500  |
| H       | -4.79647200 | 1.72566500       | -0.09771700 |
| H       | -5.43699100 | 0.73370300       | 1.22865900  |
| O       | -3.04298400 | -0.15297100      | -0.97791200 |
| H       | -5.59889500 | -1.86713300      | 1.78950200  |
| C       | -2.00769600 | -0.88696100      | -0.46522600 |
| O       | -1.02964000 | -1.16937200      | -1.16618600 |
| O       | -2.55908500 | -1.86545000      | 0.39402500  |
| O       | -1.32049600 | 0.21572100       | 0.79407300  |
| H       | -1.48108500 | -0.18209700      | 1.65932800  |
| H       | -0.79484700 | 1.74317100       | 0.84389000  |
| C       | 5.00502200  | 0.64395400       | 0.23510900  |
| C       | 5.10807100  | -0.61957600      | -0.25041300 |
| C       | 2.91068400  | -0.16593200      | 0.01587000  |

|    |             |             |             |
|----|-------------|-------------|-------------|
| N  | 3.65774400  | 0.89941600  | 0.39396000  |
| H  | 5.76370400  | 1.37448900  | 0.46933400  |
| H  | 5.97449800  | -1.20707200 | -0.51198700 |
| N  | 3.81785500  | -1.09408300 | -0.38192400 |
| C  | 3.47346200  | -2.43842300 | -0.83720800 |
| H  | 4.12076400  | -2.67864700 | -1.68701100 |
| H  | 2.44622400  | -2.38983700 | -1.20760100 |
| C  | 3.60325100  | -3.48204800 | 0.26454600  |
| H  | 3.33532500  | -4.46865100 | -0.12468200 |
| H  | 4.62618700  | -3.53429300 | 0.64996300  |
| H  | 2.93257200  | -3.24807300 | 1.09608700  |
| C  | 3.12013200  | 2.17375200  | 0.85383600  |
| H  | 3.22778600  | 2.93833300  | 0.08112500  |
| H  | 2.05834000  | 2.06282000  | 1.07379300  |
| H  | 3.65034600  | 2.48714400  | 1.75634700  |
| C  | -0.30367900 | 3.40224900  | -0.11553500 |
| O  | 0.52376100  | 4.27187900  | -0.28566100 |
| O  | -0.18363500 | 2.53991400  | 0.90541200  |
| C  | -1.53141100 | 3.23230100  | -0.98278300 |
| H  | -2.41256900 | 3.56917900  | -0.42563700 |
| H  | -1.42735500 | 3.84316900  | -1.87936900 |
| H  | -1.70216000 | 2.18614200  | -1.25189700 |
| Ag | 0.80973200  | -0.34278800 | -0.02620300 |

---

| Route 9 | CP9-6      | HF=-1253.6951642 |             |
|---------|------------|------------------|-------------|
| C       | 1.49291800 | -3.92756600      | -0.26536700 |
| H       | 0.66462200 | -4.18112900      | -0.91699200 |
| C       | 1.92105100 | -2.66863700      | -0.14272000 |
| C       | 3.05886500 | -2.14379500      | 0.72827500  |
| C       | 2.68304500 | -2.14559600      | 2.21254000  |
| H       | 2.51887900 | -3.16770500      | 2.56755600  |
| H       | 3.48987000 | -1.69317000      | 2.79737100  |
| H       | 1.77361200 | -1.56124400      | 2.36515500  |
| C       | 4.37923600 | -2.86255700      | 0.47666600  |

|   |             |             |             |
|---|-------------|-------------|-------------|
| H | 4.62997100  | -2.84705200 | -0.58693600 |
| H | 5.18177000  | -2.37017600 | 1.03394400  |
| H | 4.31954400  | -3.90402300 | 0.80523400  |
| O | 3.20221900  | -0.80073100 | 0.25531500  |
| H | 1.98068600  | -4.72786200 | 0.27772000  |
| C | 1.97172400  | -0.36638900 | -0.27655000 |
| O | 1.17304500  | 0.23630400  | 0.55604000  |
| O | 1.38071800  | -1.62329600 | -0.81350000 |
| O | 2.25527800  | 0.43647600  | -1.39724800 |
| H | 2.94883800  | -0.01573900 | -1.89634800 |
| H | 2.90124900  | 2.12585700  | -1.08927600 |
| C | -4.81711100 | -0.70882100 | -1.30274500 |
| C | -5.12911000 | 0.19053500  | -0.33523700 |
| C | -2.88731100 | -0.07004300 | -0.32063900 |
| N | -3.44391100 | -0.85509900 | -1.27539600 |
| H | -5.44446300 | -1.24112100 | -2.00071200 |
| H | -6.08233800 | 0.58883800  | -0.02400600 |
| N | -3.93654600 | 0.57053200  | 0.24892900  |
| C | -3.82514200 | 1.49259500  | 1.37806600  |
| H | -4.51079300 | 2.32613200  | 1.19572900  |
| H | -2.80786100 | 1.89110500  | 1.35623200  |
| C | -4.11680400 | 0.81948100  | 2.71271900  |
| H | -4.01797200 | 1.54655000  | 3.52386200  |
| H | -5.13200500 | 0.41227200  | 2.74354000  |
| H | -3.41165300 | 0.00385100  | 2.89519700  |
| C | -2.69485800 | -1.71961200 | -2.17403100 |
| H | -2.79036000 | -1.36836200 | -3.20489000 |
| H | -1.64374900 | -1.69772200 | -1.88367200 |
| H | -3.06601900 | -2.74496300 | -2.10182100 |
| C | 2.84984400  | 3.93028600  | -0.39121000 |
| O | 3.38694700  | 5.00683100  | -0.26817200 |
| O | 3.42598400  | 2.95332000  | -1.11061900 |
| C | 1.49703300  | 3.59380500  | 0.20277200  |
| H | 1.48614600  | 2.59349700  | 0.64820200  |

|    |             |            |             |
|----|-------------|------------|-------------|
| H  | 1.23148200  | 4.35252500 | 0.93938400  |
| H  | 0.74633500  | 3.60025300 | -0.59663300 |
| Ag | -0.85524200 | 0.08336200 | 0.11803500  |

---

| Route 9 | TS9-5       | HF=-1253.682481 |             |
|---------|-------------|-----------------|-------------|
| C       | 1.72651800  | -3.49226100     | -0.79821600 |
| H       | 0.92416500  | -3.66003400     | -1.50904500 |
| C       | 2.04756400  | -2.25395900     | -0.39945600 |
| C       | 3.19942400  | -1.89133800     | 0.53708100  |
| C       | 3.32809600  | -2.81722600     | 1.73949300  |
| H       | 3.58636300  | -3.83170300     | 1.42444500  |
| H       | 4.11637900  | -2.45452800     | 2.40592700  |
| H       | 2.38770600  | -2.84863200     | 2.29370000  |
| C       | 4.52003200  | -1.81197300     | -0.24193200 |
| H       | 4.40996800  | -1.21380400     | -1.15312700 |
| H       | 5.30315900  | -1.37406300     | 0.38523200  |
| H       | 4.83700500  | -2.81049800     | -0.55525700 |
| O       | 2.85348500  | -0.59780200     | 1.05764600  |
| H       | 2.27454200  | -4.35473800     | -0.43959000 |
| C       | 1.99113400  | 0.17245300      | 0.28186300  |
| O       | 0.96718100  | 0.66622400      | 0.77776400  |
| O       | 1.44792300  | -1.12427500     | -0.79540200 |
| O       | 2.69677700  | 0.99874500      | -0.59391100 |
| H       | 3.59488400  | 0.65793800      | -0.68380200 |
| H       | 2.57468600  | 2.80655000      | -0.26292600 |
| C       | -5.00715600 | -0.33379300     | -0.31906000 |
| C       | -4.64572000 | 0.46394100      | 0.71826100  |
| C       | -2.75507100 | -0.38661900     | -0.16941000 |
| N       | -3.83655900 | -0.84419300     | -0.84653600 |
| H       | -5.97922300 | -0.56994400     | -0.72336900 |
| H       | -5.24478700 | 1.05480900      | 1.39367400  |
| N       | -3.26797900 | 0.42028800      | 0.79053700  |
| C       | -2.46926500 | 1.11612300      | 1.80480400  |
| H       | -2.83388300 | 2.14669500      | 1.86209900  |

|    |             |             |             |
|----|-------------|-------------|-------------|
| H  | -1.43941200 | 1.14570900  | 1.44022800  |
| C  | -2.53506800 | 0.43120400  | 3.16302100  |
| H  | -1.92065300 | 0.98373600  | 3.87911300  |
| H  | -3.55786300 | 0.39084500  | 3.55118300  |
| H  | -2.14655500 | -0.58901400 | 3.09933700  |
| C  | -3.77591300 | -1.74284500 | -1.98521800 |
| H  | -4.21325700 | -1.26840900 | -2.86773900 |
| H  | -2.72808200 | -1.97075200 | -2.18236800 |
| H  | -4.31212100 | -2.67020900 | -1.76670700 |
| C  | 1.54341100  | 4.41383900  | -0.51432400 |
| O  | 1.44063800  | 5.61181700  | -0.38634300 |
| O  | 2.66066900  | 3.77284400  | -0.13254100 |
| C  | 0.46803800  | 3.53433700  | -1.11896500 |
| H  | 0.28089700  | 2.66383200  | -0.48188700 |
| H  | -0.44036100 | 4.12012900  | -1.26019900 |
| H  | 0.80625800  | 3.15530100  | -2.08984900 |
| Ag | -0.69994800 | -0.71433200 | -0.44622200 |

---

| Route 9 | CP9-7       | HF=-1253.7103157 |             |
|---------|-------------|------------------|-------------|
| C       | 3.30657100  | -0.58829900      | -2.01232700 |
| H       | 3.55021000  | 0.39844600       | -2.39076200 |
| C       | 2.23310400  | -0.75729400      | -1.21998200 |
| C       | 1.78745000  | -2.17168700      | -0.79208200 |
| C       | 0.82634400  | -2.74410600      | -1.83677600 |
| H       | 1.35765500  | -2.89165800      | -2.77971300 |
| H       | 0.41806600  | -3.70196700      | -1.49927800 |
| H       | -0.00677700 | -2.05607300      | -2.01529000 |
| C       | 2.93743500  | -3.14285300      | -0.53726200 |
| H       | 3.65949200  | -2.72322300      | 0.16332900  |
| H       | 2.53839300  | -4.07640100      | -0.12849900 |
| H       | 3.45079900  | -3.37988200      | -1.47230000 |
| O       | 0.94662600  | -2.09804700      | 0.40750200  |
| H       | 3.95012800  | -1.41035300      | -2.29840100 |
| C       | 1.26103100  | -1.30836700      | 1.44015900  |

|    |             |             |             |
|----|-------------|-------------|-------------|
| O  | 0.40329100  | -0.89419400 | 2.19506300  |
| O  | 1.47850100  | 0.26441500  | -0.80308700 |
| O  | 2.56716500  | -1.07754700 | 1.57139800  |
| H  | 2.66835800  | -0.21623300 | 2.02118800  |
| H  | 2.17853800  | 1.16275800  | 0.28300700  |
| C  | -4.80394700 | 1.26863400  | -0.28186600 |
| C  | -4.71592600 | 0.37596800  | 0.73698300  |
| C  | -2.65776900 | 0.57656500  | -0.15947200 |
| N  | -3.53542700 | 1.37499100  | -0.81787300 |
| H  | -5.64354700 | 1.83233500  | -0.65788200 |
| H  | -5.46760100 | 0.00772200  | 1.41783400  |
| N  | -3.39872000 | -0.03125900 | 0.79694700  |
| C  | -2.88798700 | -1.03114500 | 1.74018400  |
| H  | -3.31927900 | -0.80301600 | 2.72014900  |
| H  | -1.80509800 | -0.89615500 | 1.81483800  |
| C  | -3.22454700 | -2.45215200 | 1.30865000  |
| H  | -2.82636200 | -3.15847300 | 2.04239000  |
| H  | -4.30485700 | -2.61281300 | 1.23086300  |
| H  | -2.76855100 | -2.67805800 | 0.34080100  |
| C  | -3.18865200 | 2.24896600  | -1.92423200 |
| H  | -3.34698500 | 3.29503000  | -1.64816200 |
| H  | -2.13561100 | 2.09674200  | -2.16278500 |
| H  | -3.79486900 | 2.00791200  | -2.80143400 |
| C  | 3.24318300  | 2.69451900  | 0.97804000  |
| O  | 3.71521400  | 3.27841500  | 1.92587400  |
| O  | 2.51076900  | 1.58216700  | 1.14343100  |
| C  | 3.43934500  | 3.12984500  | -0.45938000 |
| H  | 2.48922000  | 3.15549500  | -1.00075600 |
| H  | 3.91163300  | 4.11170600  | -0.47916400 |
| H  | 4.08182100  | 2.40694900  | -0.97271200 |
| Ag | -0.60855500 | 0.33382700  | -0.48906500 |

---



---

Route 9

TS9-6

HF=-1253.6978096

---

C

-3.41481100

0.61973900

-1.96773200

|   |             |             |             |
|---|-------------|-------------|-------------|
| H | -3.71610000 | -0.35524300 | -2.33440700 |
| C | -2.27695200 | 0.76321500  | -1.28636000 |
| C | -1.71694900 | 2.11254100  | -0.82419900 |
| C | -0.77662400 | 2.66311400  | -1.90247800 |
| H | -1.34175500 | 2.88215700  | -2.81171200 |
| H | -0.29383300 | 3.57898100  | -1.54915500 |
| H | 0.00387900  | 1.93520400  | -2.15004100 |
| C | -2.80107500 | 3.13328000  | -0.48669600 |
| H | -3.48526700 | 2.73145900  | 0.26074400  |
| H | -2.32544100 | 4.03590600  | -0.09175400 |
| H | -3.36540600 | 3.41599900  | -1.37950500 |
| O | -0.84003600 | 1.93585700  | 0.32004900  |
| H | -4.07652900 | 1.45554300  | -2.15421900 |
| C | -1.21147200 | 1.12469200  | 1.36546400  |
| O | -0.31151500 | 0.69523200  | 2.07407300  |
| O | -1.49181300 | -0.33624800 | -1.01192800 |
| O | -2.48198200 | 0.88287700  | 1.46497200  |
| H | -2.64017300 | -0.20859200 | 1.42708300  |
| H | -2.01146800 | -0.95732800 | -0.29433100 |
| C | 4.84815400  | -1.30208600 | -0.27401600 |
| C | 4.76954900  | -0.43063700 | 0.76392800  |
| C | 2.70864400  | -0.59618200 | -0.13046100 |
| N | 3.57742100  | -1.38743400 | -0.80853000 |
| H | 5.68244300  | -1.86389800 | -0.66442400 |
| H | 5.52571200  | -0.08323100 | 1.45073200  |
| N | 3.45593700  | -0.01436000 | 0.83638900  |
| C | 2.95527500  | 0.96917700  | 1.80326900  |
| H | 3.38164700  | 0.71104800  | 2.77785700  |
| H | 1.86989400  | 0.84611400  | 1.87004300  |
| C | 3.31302500  | 2.39523200  | 1.40665500  |
| H | 2.92455400  | 3.08872100  | 2.15765800  |
| H | 4.39549600  | 2.54311000  | 1.33293400  |
| H | 2.86037100  | 2.65192600  | 0.44486000  |
| C | 3.22245600  | -2.23196600 | -1.93484700 |

|    |             |             |             |
|----|-------------|-------------|-------------|
| H  | 3.39459400  | -3.28389900 | -1.69158300 |
| H  | 2.16452700  | -2.08357800 | -2.15328500 |
| H  | 3.81309500  | -1.96020000 | -2.81377700 |
| C  | -3.57553800 | -2.30194300 | 0.99396400  |
| O  | -4.43254800 | -2.21462900 | 1.85024700  |
| O  | -2.58669800 | -1.42724300 | 0.85368000  |
| C  | -3.51923700 | -3.44826000 | -0.00076800 |
| H  | -2.58374400 | -4.00349800 | 0.12369300  |
| H  | -4.36495600 | -4.11854400 | 0.15458500  |
| H  | -3.53626000 | -3.06765200 | -1.02736400 |
| Ag | 0.64896300  | -0.32306800 | -0.43920700 |

---

| Route 9 | CP9-8       | HF=-1253.7207518 |             |
|---------|-------------|------------------|-------------|
| C       | 4.96905700  | -0.93134900      | 0.23826000  |
| H       | 5.64964200  | -0.45680400      | -0.45973600 |
| C       | 3.65623400  | -0.72816700      | 0.15475500  |
| C       | 2.58142100  | -1.24758600      | 1.10219400  |
| C       | 2.97569000  | -2.52205600      | 1.83892500  |
| H       | 3.79872700  | -2.31756800      | 2.53014500  |
| H       | 2.12201700  | -2.86965000      | 2.42880300  |
| H       | 3.26706400  | -3.30046700      | 1.13540700  |
| C       | 2.23204200  | -0.13547500      | 2.10131500  |
| H       | 1.91957000  | 0.77214300       | 1.57744700  |
| H       | 1.41229100  | -0.46525900      | 2.74686400  |
| H       | 3.10152000  | 0.09871100       | 2.72147100  |
| O       | 1.35507600  | -1.40862400      | 0.34755200  |
| H       | 5.38176000  | -1.59461300      | 0.98608900  |
| C       | 1.27072000  | -2.43438500      | -0.64469600 |
| O       | 2.24656000  | -3.10770500      | -0.91224500 |
| O       | 3.14738800  | 0.12862200       | -0.79662100 |
| O       | 0.09720800  | -2.47018200      | -1.14371300 |
| H       | 3.45974100  | 1.78690100       | -0.87681800 |
| H       | 2.17923800  | 0.03152100       | -0.76585700 |
| C       | -5.07453300 | 0.82864000       | 0.41013600  |

|    |             |             |             |
|----|-------------|-------------|-------------|
| C  | -4.24212400 | 1.89649200  | 0.50534200  |
| C  | -2.97947000 | 0.10486900  | -0.02442900 |
| N  | -4.28333000 | -0.25598100 | 0.08632300  |
| H  | -6.14333100 | 0.75182200  | 0.53641800  |
| H  | -4.44712400 | 2.93077300  | 0.73385400  |
| N  | -2.97023300 | 1.43383800  | 0.23429200  |
| C  | -1.76704400 | 2.26869700  | 0.26393300  |
| H  | -1.95628500 | 3.15147300  | -0.35487200 |
| H  | -0.96605500 | 1.70466000  | -0.21517300 |
| C  | -1.36405900 | 2.66305500  | 1.67672600  |
| H  | -0.43145400 | 3.22928100  | 1.62712400  |
| H  | -2.12542400 | 3.27989800  | 2.16516400  |
| H  | -1.19251000 | 1.77418300  | 2.29031700  |
| C  | -4.78904800 | -1.60297900 | -0.11312500 |
| H  | -5.52943300 | -1.61429200 | -0.91731000 |
| H  | -3.95285500 | -2.24671700 | -0.38765500 |
| H  | -5.24465200 | -1.97827300 | 0.80716300  |
| C  | 2.35512300  | 3.31472100  | -0.67735700 |
| O  | 1.36004200  | 2.66607400  | -0.39091400 |
| O  | 3.53717300  | 2.77658200  | -0.94415500 |
| C  | 2.38482100  | 4.81858200  | -0.76986800 |
| H  | 2.69886300  | 5.12131600  | -1.77289900 |
| H  | 1.39943800  | 5.22756800  | -0.54924100 |
| H  | 3.12185900  | 5.21861200  | -0.06749500 |
| Ag | -1.36060100 | -1.12588700 | -0.50671100 |

---

| Route 9 | TS9-7      | HF=-1253.7074692 |             |
|---------|------------|------------------|-------------|
| C       | 4.90339200 | 0.30730400       | 0.44578600  |
| H       | 5.51960700 | 0.90099000       | -0.22012500 |
| C       | 3.62674300 | 0.05959700       | 0.15676500  |
| C       | 2.60913000 | -0.70596000      | 1.01284300  |
| C       | 3.22565300 | -1.88473200      | 1.76167500  |
| H       | 3.95318800 | -1.53215300      | 2.49899100  |
| H       | 2.43660000 | -2.42014700      | 2.29944800  |

|   |             |             |             |
|---|-------------|-------------|-------------|
| H | 3.71564200  | -2.57211500 | 1.07329900  |
| C | 1.96985700  | 0.27900400  | 2.00309000  |
| H | 1.50174400  | 1.10968200  | 1.46578700  |
| H | 1.20473100  | -0.23824700 | 2.59367700  |
| H | 2.72390500  | 0.68460400  | 2.68443900  |
| O | 1.55912800  | -1.13184600 | 0.13371800  |
| H | 5.35548100  | -0.08613400 | 1.34696000  |
| C | 1.64550700  | -2.52227100 | -0.90048700 |
| O | 2.76967600  | -2.91379900 | -1.02535500 |
| O | 3.04239500  | 0.57591800  | -0.97409900 |
| O | 0.48927100  | -2.68558600 | -1.23705500 |
| H | 2.62578300  | 2.19399600  | -1.09124800 |
| H | 2.19468200  | 0.07751200  | -1.02136000 |
| C | -4.81061700 | -0.83891100 | -0.41973600 |
| C | -4.72505500 | 0.45351900  | -0.01234200 |
| C | -2.63096400 | -0.38337400 | -0.04985000 |
| N | -3.52050100 | -1.33113500 | -0.43658900 |
| H | -5.66367200 | -1.43454500 | -0.70546700 |
| H | -5.49077000 | 1.20074400  | 0.12770100  |
| N | -3.38563800 | 0.71195200  | 0.20285800  |
| C | -2.85111800 | 1.98676900  | 0.68303000  |
| H | -3.44437900 | 2.78156700  | 0.21893200  |
| H | -1.82823000 | 2.07404600  | 0.30593500  |
| C | -2.89044700 | 2.09426300  | 2.20207200  |
| H | -2.48704200 | 3.06168700  | 2.51536600  |
| H | -3.91134700 | 2.00927400  | 2.58779000  |
| H | -2.28251300 | 1.30810500  | 2.65855900  |
| C | -3.16385800 | -2.68735400 | -0.82765900 |
| H | -3.60167200 | -2.91840400 | -1.80189300 |
| H | -2.07744900 | -2.76093400 | -0.89972200 |
| H | -3.52899900 | -3.40391600 | -0.08665100 |
| C | 1.07223900  | 3.29407500  | -0.91627600 |
| O | 0.34636500  | 2.38840500  | -0.53022200 |
| O | 2.35276600  | 3.14564600  | -1.21573500 |

|    |             |             |             |
|----|-------------|-------------|-------------|
| C  | 0.61140700  | 4.71670700  | -1.10513700 |
| H  | 0.78660500  | 5.02797600  | -2.13884700 |
| H  | -0.44727800 | 4.80516900  | -0.86399800 |
| H  | 1.19732200  | 5.38257900  | -0.46484700 |
| Ag | -0.55610600 | -0.65869700 | 0.06682400  |

---

| Route 9 | CP9-9       | HF=-1065.1525441 |             |
|---------|-------------|------------------|-------------|
| C       | -2.75555900 | -0.40072500      | -0.66436500 |
| C       | -2.43417100 | -1.57325700      | 0.29741800  |
| C       | -3.55866300 | -1.93281900      | 1.26703800  |
| H       | -4.44878600 | -2.28342900      | 0.73692500  |
| H       | -3.21569800 | -2.73142500      | 1.93179000  |
| H       | -3.84345000 | -1.07529800      | 1.88467000  |
| C       | -2.03342700 | -2.79649500      | -0.52392400 |
| H       | -1.25217500 | -2.53304600      | -1.24205000 |
| H       | -1.66416400 | -3.58763800      | 0.13610600  |
| H       | -2.89454700 | -3.17482000      | -1.08221100 |
| O       | -1.77828600 | 0.00505000       | -1.42182000 |
| C       | 4.26264800  | 0.95317800       | 0.41086700  |
| C       | 4.36943700  | -0.40040800      | 0.40055500  |
| C       | 2.27729300  | 0.12430700       | -0.26958200 |
| N       | 2.97839200  | 1.25101300       | 0.00192000  |
| H       | 4.98139000  | 1.71599700       | 0.66629700  |
| H       | 5.19624300  | -1.04607900      | 0.65222200  |
| N       | 3.14782500  | -0.88504100      | -0.02330200 |
| C       | 2.80084800  | -2.30298700      | -0.10273400 |
| H       | 3.70914200  | -2.84543900      | -0.38380000 |
| H       | 2.08490200  | -2.40884700      | -0.92200700 |
| C       | 2.21434100  | -2.83667000      | 1.19816200  |
| H       | 2.01640700  | -3.90847800      | 1.09995800  |
| H       | 2.90746100  | -2.69364900      | 2.03293900  |
| H       | 1.27096800  | -2.33498900      | 1.43103100  |
| C       | 2.44515800  | 2.60067400       | -0.13866600 |
| H       | 3.13910000  | 3.30070400       | 0.32954700  |

|    |             |             |             |
|----|-------------|-------------|-------------|
| H  | 2.34088000  | 2.85426300  | -1.19683100 |
| H  | 1.47540600  | 2.67469500  | 0.35985000  |
| C  | -1.53103700 | 2.49123400  | 0.91422300  |
| O  | -0.49501400 | 2.78299600  | 1.47766400  |
| C  | -2.00047900 | 3.11568700  | -0.37579800 |
| H  | -3.01570400 | 3.50898200  | -0.26945000 |
| H  | -1.32235400 | 3.91991500  | -0.66102500 |
| H  | -2.01770200 | 2.33772700  | -1.15021300 |
| Ag | 0.25084500  | -0.04861600 | -0.76643500 |
| O  | -2.33740700 | 1.54703800  | 1.43016700  |
| C  | -3.98591900 | 0.20363200  | -0.65209700 |
| H  | -3.01692300 | 1.24215000  | 0.75594300  |
| H  | -4.20593100 | 0.96889500  | -1.39085200 |
| H  | -4.81879200 | -0.20033400 | -0.09030900 |
| O  | -1.26754500 | -1.21806900 | 1.07029400  |
| H  | -1.47572200 | -0.38493100 | 1.52657100  |

---

| Route 9 | TS9-8       | HF=-1065.140624 |             |
|---------|-------------|-----------------|-------------|
| C       | -2.71835700 | -0.47524000     | -0.77733300 |
| C       | -2.43194700 | -1.61195900     | 0.24374400  |
| C       | -3.59821500 | -1.94436700     | 1.17273700  |
| H       | -4.46612900 | -2.31104900     | 0.61573500  |
| H       | -3.28286600 | -2.72523700     | 1.87125300  |
| H       | -3.90318200 | -1.07124100     | 1.75617700  |
| C       | -1.97558000 | -2.85895800     | -0.50813500 |
| H       | -1.16199500 | -2.61408300     | -1.19610100 |
| H       | -1.62839800 | -3.61225300     | 0.20531500  |
| H       | -2.80079600 | -3.28085500     | -1.08984500 |
| O       | -1.75393500 | -0.13161000     | -1.52770700 |
| C       | 4.28719700  | 1.08098000      | 0.35030400  |
| C       | 4.43528800  | -0.26841700     | 0.37729500  |
| C       | 2.31538400  | 0.17414100      | -0.26569700 |
| N       | 2.98641300  | 1.32823900      | -0.04022100 |
| H       | 4.98689300  | 1.87242100      | 0.56902300  |

|    |             |             |             |
|----|-------------|-------------|-------------|
| H  | 5.28531300  | -0.88145700 | 0.63345400  |
| N  | 3.22079800  | -0.80143900 | -0.00826100 |
| C  | 2.91075200  | -2.22934900 | -0.03066800 |
| H  | 3.83212800  | -2.75970700 | -0.29150300 |
| H  | 2.19655600  | -2.38700900 | -0.84329200 |
| C  | 2.34007000  | -2.72475800 | 1.29231600  |
| H  | 2.16076600  | -3.80290300 | 1.23678100  |
| H  | 3.03365200  | -2.53630500 | 2.11753500  |
| H  | 1.38962400  | -2.23025100 | 1.51169600  |
| C  | 2.41092300  | 2.65677400  | -0.21191500 |
| H  | 3.02292300  | 3.37559000  | 0.33615100  |
| H  | 2.40106000  | 2.92935800  | -1.27101800 |
| H  | 1.39520800  | 2.67008200  | 0.19304300  |
| C  | -1.67973000 | 2.32834500  | 0.91808500  |
| O  | -0.48763900 | 2.30720900  | 1.21684800  |
| C  | -2.28656700 | 3.46496100  | 0.12022300  |
| H  | -3.17746500 | 3.85097000  | 0.62328600  |
| H  | -1.55903800 | 4.26503800  | -0.02009100 |
| H  | -2.60303600 | 3.08731700  | -0.85826500 |
| Ag | 0.27741200  | -0.06758800 | -0.71768700 |
| O  | -2.50968900 | 1.36923000  | 1.26387100  |
| C  | -3.90435100 | 0.27590700  | -0.68884600 |
| H  | -3.25845800 | 1.01785400  | 0.40561500  |
| H  | -4.08550600 | 0.98297100  | -1.49640900 |
| H  | -4.79057300 | -0.17087800 | -0.24838200 |
| O  | -1.31521600 | -1.17928700 | 1.03920800  |
| H  | -1.57291200 | -0.31204300 | 1.42008100  |

---

| Route 9 | CP9-10     | HF=-1065.1804191 |             |
|---------|------------|------------------|-------------|
| C       | 2.55523800 | -1.15481400      | 1.19626700  |
| C       | 2.69141700 | -1.37257200      | -0.32885200 |
| C       | 4.12123600 | -1.09470600      | -0.81530400 |
| H       | 4.85737900 | -1.75255400      | -0.34370500 |
| H       | 4.15674300 | -1.26028100      | -1.89579800 |

|    |             |             |             |
|----|-------------|-------------|-------------|
| H  | 4.39383800  | -0.05268700 | -0.62694500 |
| C  | 2.29569400  | -2.83215000 | -0.60207300 |
| H  | 1.26296200  | -3.00635500 | -0.28399500 |
| H  | 2.35968800  | -3.01354000 | -1.67869300 |
| H  | 2.94857500  | -3.54481900 | -0.08832700 |
| O  | 1.54002400  | -0.67289900 | 1.67060000  |
| C  | -4.46000700 | 0.88518600  | 0.51245500  |
| C  | -4.55582500 | -0.46007900 | 0.36137900  |
| C  | -2.36542600 | 0.09141800  | 0.19837900  |
| N  | -3.11881800 | 1.20013000  | 0.40727300  |
| H  | -5.21923800 | 1.63098700  | 0.69082700  |
| H  | -5.41512800 | -1.11271400 | 0.37562500  |
| N  | -3.26705000 | -0.92368200 | 0.17554500  |
| C  | -2.91856600 | -2.31511500 | -0.08775800 |
| H  | -3.51353600 | -2.94480000 | 0.58246700  |
| H  | -1.86813700 | -2.42568900 | 0.19271100  |
| C  | -3.13203800 | -2.70565800 | -1.54470200 |
| H  | -2.85853600 | -3.75439600 | -1.69531700 |
| H  | -4.17723200 | -2.58087700 | -1.84445400 |
| H  | -2.50907400 | -2.08934800 | -2.19884100 |
| C  | -2.58731600 | 2.55069300  | 0.53457100  |
| H  | -3.10109100 | 3.21267800  | -0.16789100 |
| H  | -2.74333200 | 2.91722100  | 1.55345500  |
| H  | -1.51758800 | 2.54588600  | 0.30934100  |
| C  | 1.76458600  | 2.61098400  | -0.50222700 |
| O  | 0.57830600  | 2.34269300  | -0.18057800 |
| C  | 2.21516400  | 4.06381700  | -0.42825400 |
| H  | 2.20724000  | 4.48976400  | -1.43764200 |
| H  | 1.54681700  | 4.65125800  | 0.20387000  |
| H  | 3.24142800  | 4.12472400  | -0.05770400 |
| Ag | -0.24588500 | 0.07103700  | -0.03444300 |
| O  | 2.62874100  | 1.77920300  | -0.91673600 |
| C  | 3.68463300  | -1.58070400 | 2.10490400  |
| H  | 4.50729600  | -0.86189000 | 2.01683500  |

|   |            |             |             |
|---|------------|-------------|-------------|
| H | 3.33470600 | -1.59252100 | 3.13822900  |
| H | 4.08565700 | -2.56104000 | 1.83085800  |
| O | 1.78777500 | -0.55540400 | -1.02487300 |
| H | 2.14670000 | 0.44057500  | -1.01582700 |

---

| Route 10 | CP10-1      | HF=-1365.8065641 |             |
|----------|-------------|------------------|-------------|
| C        | 1.01171600  | 4.64839000       | -0.16395900 |
| C        | 2.19656300  | 3.99164800       | -0.07208700 |
| C        | 0.56538200  | 2.43508000       | -0.07988400 |
| N        | 0.02795600  | 3.67822800       | -0.16416100 |
| H        | 0.79066600  | 5.70211700       | -0.23491300 |
| H        | 3.20819600  | 4.36543200       | -0.03940500 |
| N        | 1.90232100  | 2.64412900       | -0.02635100 |
| C        | 2.90469000  | 1.58283200       | 0.12674400  |
| H        | 3.72318300  | 1.80516600       | -0.56572800 |
| H        | 2.44690900  | 0.64406600       | -0.19590700 |
| C        | 3.41255000  | 1.46817500       | 1.55679500  |
| H        | 4.10361400  | 0.62483400       | 1.61868200  |
| H        | 3.92641200  | 2.37790300       | 1.88552100  |
| H        | 2.58278900  | 1.27242600       | 2.24224100  |
| C        | -1.39331100 | 3.95106900       | -0.27242900 |
| H        | -1.63133900 | 4.36435400       | -1.25669700 |
| H        | -1.93099100 | 3.01185300       | -0.13864600 |
| H        | -1.70097600 | 4.65797300       | 0.50281600  |
| Ag       | -0.37538600 | 0.54363600       | -0.10855800 |
| C        | -3.19717900 | -0.68279400      | -2.30682700 |
| O        | -2.63993300 | 0.34341800       | -2.36982900 |
| O        | -3.77677500 | -1.69489000      | -2.28549800 |
| H        | -0.97082500 | -2.00992400      | 0.11455300  |
| C        | -3.42691600 | -0.37600200      | 1.48088000  |
| C        | -2.43881400 | -1.46428900      | 1.40249000  |
| O        | -1.68083100 | -1.26004000      | 0.20196900  |
| C        | -1.51171500 | -1.42027100      | 2.62566200  |
| H        | -2.07449000 | -1.57759900      | 3.55019600  |

|   |             |             |             |
|---|-------------|-------------|-------------|
| H | -0.75267400 | -2.20206200 | 2.53076300  |
| H | -1.01119100 | -0.44859200 | 2.68499500  |
| C | -3.15631800 | -2.81830300 | 1.30326600  |
| H | -3.78440300 | -2.84401800 | 0.41042400  |
| H | -2.41185200 | -3.61704100 | 1.23414500  |
| H | -3.78145100 | -2.99335700 | 2.18333800  |
| C | -4.24723000 | 0.50783800  | 1.57170800  |
| H | -4.98193200 | 1.27626500  | 1.65269300  |
| C | 3.48779500  | -2.68110700 | -0.18493800 |
| O | 3.61974900  | -1.71596500 | 0.53434200  |
| O | 2.31358900  | -3.12622300 | -0.67113300 |
| C | 4.61358300  | -3.57817300 | -0.63357400 |
| H | 4.71103000  | -3.52975200 | -1.72241100 |
| H | 5.54446100  | -3.26216300 | -0.16331200 |
| H | 4.39333800  | -4.61718800 | -0.37405000 |
| C | 1.14321200  | -2.30846400 | -0.51949100 |
| O | 0.19758500  | -2.92573300 | 0.01227000  |
| O | 1.21019800  | -1.16330000 | -0.98332300 |

---

| Route 10 | TS10-1      | HF=-1365.7761935 |             |
|----------|-------------|------------------|-------------|
| C        | -2.89248200 | 3.87972600       | 0.10303700  |
| C        | -1.62524000 | 4.26593900       | 0.39773600  |
| C        | -1.54717500 | 2.08275500       | -0.17256100 |
| N        | -2.82248600 | 2.54329600       | -0.24113800 |
| H        | -3.81831500 | 4.43383700       | 0.10093500  |
| H        | -1.23397700 | 5.22265900       | 0.70742800  |
| N        | -0.82104000 | 3.15780600       | 0.21956700  |
| C        | 0.62058400  | 3.13669900       | 0.48144300  |
| H        | 1.04489800  | 4.05271800       | 0.05789300  |
| H        | 1.04165400  | 2.29232000       | -0.06703500 |
| C        | 0.94071900  | 3.01999300       | 1.96498100  |
| H        | 2.02429100  | 2.96218300       | 2.09223800  |
| H        | 0.56388300  | 3.87602300       | 2.53427900  |
| H        | 0.50013900  | 2.10886800       | 2.38008100  |

|    |             |             |             |
|----|-------------|-------------|-------------|
| C  | -3.96559800 | 1.74349100  | -0.64281500 |
| H  | -4.41728100 | 2.15302400  | -1.55054800 |
| H  | -3.61961000 | 0.72867200  | -0.84142700 |
| H  | -4.71159700 | 1.71970400  | 0.15616800  |
| Ag | -0.83679600 | 0.13322700  | -0.61231700 |
| C  | -0.78830600 | -2.70109400 | -1.47382600 |
| O  | -0.88576700 | -1.68200600 | -2.13478200 |
| O  | -0.90264500 | -3.88783500 | -1.48720100 |
| H  | 1.18916300  | -1.92841200 | 0.04226300  |
| C  | -2.13647500 | -2.93543800 | 1.24817300  |
| C  | -0.67206300 | -2.77595400 | 1.28252600  |
| O  | -0.24317100 | -2.10177200 | 0.08447300  |
| C  | -0.29670100 | -1.87210800 | 2.46703400  |
| H  | -0.60791700 | -2.33076300 | 3.41003300  |
| H  | 0.78739100  | -1.72650400 | 2.48995800  |
| H  | -0.78672200 | -0.89863500 | 2.37464000  |
| C  | 0.01633900  | -4.14251300 | 1.41622800  |
| H  | -0.22447100 | -4.77043600 | 0.55920900  |
| H  | 1.10043500  | -3.99912900 | 1.46313800  |
| H  | -0.30938500 | -4.64101800 | 2.33395000  |
| C  | -3.33982400 | -3.05309300 | 1.25875400  |
| H  | -4.39739700 | -3.18721500 | 1.24789200  |
| C  | 4.47488400  | 0.76035800  | -0.05788200 |
| O  | 3.89315100  | 1.64547300  | 0.51105700  |
| O  | 3.91518400  | -0.45535600 | -0.36980000 |
| C  | 5.91334900  | 0.77495800  | -0.48788100 |
| H  | 5.96999400  | 0.70211100  | -1.57826500 |
| H  | 6.38530900  | 1.69701100  | -0.15088200 |
| H  | 6.43764900  | -0.09241100 | -0.07775300 |
| C  | 2.53714000  | -0.60389800 | -0.38139100 |
| O  | 2.23376600  | -1.78121600 | 0.06234600  |
| O  | 1.79961200  | 0.25984600  | -0.81305000 |

---

Route 10 CP10-2

HF=-1365.7891002

---

---

|    |             |             |             |
|----|-------------|-------------|-------------|
| C  | -1.23227200 | 4.38774500  | -0.22539200 |
| C  | 0.07070200  | 4.62836100  | 0.07029500  |
| C  | -0.16659500 | 2.39861200  | -0.20434300 |
| N  | -1.35547800 | 3.02173500  | -0.38738100 |
| H  | -2.06690300 | 5.06215100  | -0.33837300 |
| H  | 0.59018200  | 5.55252800  | 0.27144200  |
| N  | 0.70448700  | 3.40133500  | 0.07293400  |
| C  | 2.10819200  | 3.19470600  | 0.42526600  |
| H  | 2.68145000  | 4.02429900  | -0.00153000 |
| H  | 2.42794800  | 2.27671200  | -0.07466700 |
| C  | 2.32383800  | 3.09180700  | 1.92972700  |
| H  | 3.38607700  | 2.94120600  | 2.14311000  |
| H  | 1.99725000  | 4.00081100  | 2.44422800  |
| H  | 1.77100100  | 2.24265000  | 2.34071600  |
| C  | -2.60751600 | 2.35013500  | -0.71044000 |
| H  | -2.94526800 | 2.64841600  | -1.70686100 |
| H  | -2.45956400 | 1.27059200  | -0.68489400 |
| H  | -3.36995100 | 2.61302100  | 0.02570800  |
| C  | -4.63052200 | -1.45311500 | 0.10901500  |
| O  | -4.53828300 | -0.25881700 | 0.22035000  |
| O  | -3.57475200 | -2.32343700 | 0.19707900  |
| C  | -5.90260300 | -2.22682800 | -0.09250100 |
| H  | -6.01024300 | -2.98258400 | 0.69028900  |
| H  | -6.75087000 | -1.54356500 | -0.07695500 |
| H  | -5.86403100 | -2.75491400 | -1.05007100 |
| Ag | 0.24211600  | 0.31788900  | -0.24102600 |
| C  | -2.27064100 | -1.85508400 | 0.09010000  |
| O  | -1.96714800 | -1.00009400 | -0.72577900 |
| O  | -1.51321400 | -2.50041800 | 0.90573800  |
| H  | -0.49689900 | -2.20093900 | 0.76929900  |
| C  | 2.49522500  | 0.00902600  | -2.11038600 |
| H  | 2.21504100  | 0.78979600  | -2.78090700 |
| C  | 2.82194100  | -0.89948200 | -1.37684100 |
| C  | 3.31556000  | -2.02364600 | -0.55618600 |

|   |            |             |             |
|---|------------|-------------|-------------|
| O | 3.01576900 | -1.85221500 | 0.83896900  |
| C | 2.77998400 | -3.35882200 | -1.08703000 |
| H | 3.12800700 | -3.52349700 | -2.11072700 |
| H | 3.15836400 | -4.16572100 | -0.45235300 |
| H | 1.69049500 | -3.36796100 | -1.07376500 |
| C | 4.85017000 | -2.00770500 | -0.59563500 |
| H | 5.22961000 | -1.06793600 | -0.18814100 |
| H | 5.22926400 | -2.83168200 | 0.01459400  |
| H | 5.20937300 | -2.12342000 | -1.62140800 |
| C | 1.72260600 | -1.85602100 | 1.32759400  |
| O | 0.78691800 | -1.76011200 | 0.41524500  |
| O | 1.58555200 | -1.93495500 | 2.52729100  |

---

| Route 10 | TS10-2      | HF=-1365.7660715 |             |
|----------|-------------|------------------|-------------|
| C        | 2.85090300  | -3.81750300      | -0.82907900 |
| C        | 3.72474600  | -2.84847100      | -0.45727000 |
| C        | 1.64651000  | -2.07559300      | -0.03388100 |
| N        | 1.58818100  | -3.32552800      | -0.56165600 |
| H        | 3.01796900  | -4.79560800      | -1.25299400 |
| H        | 4.80259000  | -2.82418700      | -0.49225200 |
| N        | 2.97047700  | -1.79586100      | 0.02317900  |
| C        | 3.54217700  | -0.53999200      | 0.51733400  |
| H        | 4.17897100  | -0.77493100      | 1.37759400  |
| H        | 2.71308500  | 0.07949000       | 0.86064900  |
| C        | 4.31881100  | 0.20550700       | -0.55716200 |
| H        | 4.70928300  | 1.13245300       | -0.13010800 |
| H        | 5.16398700  | -0.37567700      | -0.94044200 |
| H        | 3.65610000  | 0.46447200       | -1.38599000 |
| C        | 0.35994800  | -4.04947000      | -0.83208700 |
| H        | 0.36821800  | -5.01521600      | -0.31938200 |
| H        | -0.47568900 | -3.45408500      | -0.46311800 |
| H        | 0.23806200  | -4.20943900      | -1.90698800 |
| C        | 2.39141800  | 3.57595700       | 0.42548600  |
| O        | 2.68874500  | 2.72904500       | 1.22841900  |

|    |             |             |             |
|----|-------------|-------------|-------------|
| O  | 1.28661100  | 3.53465400  | -0.38067000 |
| C  | 3.13543000  | 4.85975700  | 0.18425300  |
| H  | 2.46913200  | 5.71189600  | 0.34468500  |
| H  | 3.98928900  | 4.91879200  | 0.85819400  |
| H  | 3.47112000  | 4.90429200  | -0.85604800 |
| Ag | 0.00307100  | -0.84741300 | 0.59969800  |
| C  | 0.55383200  | 2.35903300  | -0.52551500 |
| O  | 1.09046500  | 1.26812300  | -0.57451500 |
| O  | -0.69074900 | 2.66113900  | -0.64797500 |
| H  | -1.28139700 | 1.80658300  | -0.81266400 |
| C  | -1.77070800 | -0.28083200 | 1.76650700  |
| H  | -1.62218800 | -0.42622100 | 2.82399800  |
| C  | -2.72523600 | -0.14391100 | 0.96943500  |
| C  | -4.07654700 | -0.33969300 | 0.38981500  |
| O  | -4.42081200 | 0.68263200  | -0.52784500 |
| C  | -4.14085400 | -1.69812100 | -0.32481500 |
| H  | -3.94185100 | -2.51891300 | 0.37033800  |
| H  | -5.13899200 | -1.82354000 | -0.75375700 |
| H  | -3.40460500 | -1.72464900 | -1.13149900 |
| C  | -5.09446000 | -0.26008100 | 1.53601200  |
| H  | -5.04979300 | 0.72099300  | 2.01375900  |
| H  | -6.09648100 | -0.40084200 | 1.12246200  |
| H  | -4.90557500 | -1.03529400 | 2.28285200  |
| C  | -3.36783400 | 1.18231500  | -1.28411200 |
| O  | -2.21529300 | 0.70399700  | -0.90866800 |
| O  | -3.61458800 | 1.98845300  | -2.15065800 |

---

| Route 10 | CP10-3      | HF=-1365.7991525 |             |
|----------|-------------|------------------|-------------|
| C        | -3.18704600 | -3.55102000      | -1.02442400 |
| C        | -3.97655300 | -2.59973000      | -0.46376600 |
| C        | -1.83166200 | -1.98754600      | -0.11009900 |
| N        | -1.88267100 | -3.15820900      | -0.79610800 |
| H        | -3.43855800 | -4.45044700      | -1.56475400 |
| H        | -5.05108000 | -2.51201600      | -0.41916600 |

|    |             |             |             |
|----|-------------|-------------|-------------|
| N  | -3.13127100 | -1.65556400 | 0.08359700  |
| C  | -3.58592500 | -0.47250800 | 0.81784300  |
| H  | -4.44757400 | -0.06365600 | 0.28200800  |
| H  | -2.79161600 | 0.27394300  | 0.76412600  |
| C  | -3.93485100 | -0.79203300 | 2.26516700  |
| H  | -4.26650900 | 0.11892500  | 2.77140900  |
| H  | -4.73669900 | -1.53425900 | 2.33646900  |
| H  | -3.05949500 | -1.17705900 | 2.79622700  |
| C  | -0.71729900 | -3.89487800 | -1.25370700 |
| H  | -0.73562000 | -3.99586400 | -2.34212900 |
| H  | 0.17558300  | -3.34032500 | -0.96339500 |
| H  | -0.69090300 | -4.88785900 | -0.79644100 |
| C  | -2.59885300 | 3.77968500  | -0.84592500 |
| O  | -3.33475000 | 2.83048800  | -0.83941700 |
| O  | -1.25453500 | 3.71276200  | -0.55286100 |
| C  | -2.96083000 | 5.18916900  | -1.21503100 |
| H  | -2.31171300 | 5.54486500  | -2.01987900 |
| H  | -4.00379900 | 5.22695200  | -1.52684300 |
| H  | -2.80234800 | 5.84679900  | -0.35504600 |
| Ag | -0.09166300 | -0.91928800 | 0.47383700  |
| C  | -0.76068800 | 2.60109500  | 0.10843200  |
| O  | -1.32200800 | 2.07496400  | 1.03653000  |
| O  | 0.40494200  | 2.30533900  | -0.41645100 |
| H  | 0.78411300  | 1.49959500  | 0.05038800  |
| C  | 1.67945300  | 0.08334800  | 0.99922600  |
| H  | 1.79329700  | 0.55816700  | 1.97725400  |
| C  | 2.83095100  | -0.01009500 | 0.33248500  |
| C  | 4.24207800  | 0.44231900  | 0.67999300  |
| O  | 4.99818700  | 0.04332000  | -0.49110100 |
| C  | 4.35471000  | 1.95626000  | 0.82308900  |
| H  | 3.76859500  | 2.29434500  | 1.68212500  |
| H  | 5.39870200  | 2.24609700  | 0.97464800  |
| H  | 3.97610400  | 2.45721500  | -0.07142700 |
| C  | 4.81082300  | -0.29820300 | 1.88591600  |

|   |            |             |             |
|---|------------|-------------|-------------|
| H | 4.76573200 | -1.37895700 | 1.72911000  |
| H | 5.85263300 | -0.00916400 | 2.05356100  |
| H | 4.22891700 | -0.05542800 | 2.77918000  |
| C | 4.19522600 | -0.55868000 | -1.38894700 |
| O | 2.91607800 | -0.59944200 | -0.92872300 |
| O | 4.54718700 | -1.00268200 | -2.44319000 |

| Route 10 | TS10-3      | HF=-1365.7927981 |             |
|----------|-------------|------------------|-------------|
| C        | -2.15648900 | 4.32074300       | 0.39180200  |
| C        | -3.15154400 | 3.42797700       | 0.62589600  |
| C        | -1.32725900 | 2.25064500       | 0.01236900  |
| N        | -1.05185400 | 3.58110800       | 0.01725200  |
| H        | -2.13986200 | 5.39714500       | 0.46479600  |
| H        | -4.17229700 | 3.57839400       | 0.94129000  |
| N        | -2.62550400 | 2.17392000       | 0.39034300  |
| C        | -3.39365700 | 0.93053800       | 0.51694500  |
| H        | -3.86252600 | 0.92978300       | 1.50598600  |
| H        | -2.68985400 | 0.09926300       | 0.47918300  |
| C        | -4.43027100 | 0.77163400       | -0.58457000 |
| H        | -4.95271800 | -0.17633200      | -0.43677100 |
| H        | -5.16849000 | 1.58081600       | -0.57930700 |
| H        | -3.94579300 | 0.74176500       | -1.56395200 |
| C        | 0.23845400  | 4.15691000       | -0.31189500 |
| H        | 0.63596700  | 4.71444300       | 0.54070800  |
| H        | 0.92064900  | 3.34184300       | -0.55604900 |
| H        | 0.15010400  | 4.82474900       | -1.17346000 |
| C        | -3.20939000 | -3.35610400      | 0.44807600  |
| O        | -3.57249000 | -2.33632500      | 0.98312400  |
| O        | -2.00536400 | -3.52605800      | -0.15605500 |
| C        | -3.99801900 | -4.63694400      | 0.39203200  |
| H        | -3.41474000 | -5.45463500      | 0.82433900  |
| H        | -4.93374200 | -4.51441100      | 0.93650700  |
| H        | -4.20211600 | -4.89976100      | -0.65024800 |
| Ag       | -0.00207400 | 0.64727800       | -0.44471100 |

|   |             |             |             |
|---|-------------|-------------|-------------|
| C | -1.19909700 | -2.39395500 | -0.42653200 |
| O | -1.68917800 | -1.42823400 | -0.99325800 |
| O | 0.00151100  | -2.60551100 | -0.05838100 |
| H | 0.69772100  | -1.65092800 | -0.37118200 |
| C | 1.64233400  | -0.74682900 | -0.85880400 |
| H | 1.84998100  | -0.90809700 | -1.91961100 |
| C | 2.76112600  | -0.57348100 | -0.13746000 |
| C | 4.22453100  | -0.59443700 | -0.54847900 |
| O | 4.90307800  | -0.33601200 | 0.70515300  |
| C | 4.65887600  | -1.96788100 | -1.05174300 |
| H | 4.13698100  | -2.20774500 | -1.98179000 |
| H | 5.73652800  | -1.97462900 | -1.23836200 |
| H | 4.42301700  | -2.74040700 | -0.31566700 |
| C | 4.58003700  | 0.52351900  | -1.52197200 |
| H | 4.31140100  | 1.49723100  | -1.10445700 |
| H | 5.65360600  | 0.51455600  | -1.73063600 |
| H | 4.03788200  | 0.38636200  | -2.46128800 |
| C | 4.01449800  | -0.22889100 | 1.70897200  |
| O | 2.74139500  | -0.38064700 | 1.22780800  |
| O | 4.27635800  | -0.02312800 | 2.85540500  |

---

| Route 10 | CP10-4      | HF=-1365.8316495 |             |
|----------|-------------|------------------|-------------|
| C        | 1.65281100  | 4.10386500       | -0.07890600 |
| C        | 0.98365900  | 4.10624700       | 1.10283600  |
| C        | 0.11186800  | 2.46193800       | -0.17105700 |
| N        | 1.09948500  | 3.09639200       | -0.84302900 |
| H        | 2.46907000  | 4.71533100       | -0.43033200 |
| H        | 1.09288800  | 4.73247900       | 1.97459000  |
| N        | 0.05034300  | 3.09172700       | 1.02768800  |
| C        | -0.91906400 | 2.77137800       | 2.07606700  |
| H        | -0.41270800 | 2.89410300       | 3.03870400  |
| H        | -1.16850700 | 1.71227200       | 1.96819300  |
| C        | -2.17151200 | 3.63401900       | 1.99776600  |
| H        | -2.86152600 | 3.35708200       | 2.79991100  |

|    |             |             |             |
|----|-------------|-------------|-------------|
| H  | -1.93418500 | 4.69743200  | 2.10102200  |
| H  | -2.68299400 | 3.48312100  | 1.04306800  |
| C  | 1.59115900  | 2.69655000  | -2.15377800 |
| H  | 2.46751200  | 2.05303000  | -2.04209300 |
| H  | 0.79925000  | 2.14691100  | -2.66389700 |
| H  | 1.84080400  | 3.58699000  | -2.73508300 |
| C  | -4.64832500 | -2.28415300 | -0.02598600 |
| O  | -5.05407400 | -1.18053600 | 0.25446500  |
| O  | -3.34644800 | -2.59040400 | -0.20771300 |
| C  | -5.51026500 | -3.50637400 | -0.21459400 |
| H  | -5.17961200 | -4.30715700 | 0.45263000  |
| H  | -6.55021200 | -3.25307700 | -0.01048200 |
| H  | -5.41147900 | -3.87416700 | -1.24018600 |
| Ag | -1.03526300 | 0.80571400  | -0.71638200 |
| C  | -2.42708000 | -1.49881500 | -0.09751000 |
| O  | -2.30850800 | -0.84850000 | -1.17482200 |
| O  | -1.84132500 | -1.37576200 | 0.97374800  |
| H  | 0.27152100  | -2.10179700 | 1.07692200  |
| C  | 1.23634400  | -2.60237300 | 1.10839100  |
| H  | 1.29907800  | -3.56614400 | 1.60163700  |
| C  | 2.32694300  | -2.08645800 | 0.55981100  |
| C  | 3.74346300  | -2.62752800 | 0.48573400  |
| O  | 4.43009100  | -1.55803900 | -0.22032500 |
| C  | 4.39293000  | -2.78164400 | 1.85543900  |
| H  | 3.87541900  | -3.55629100 | 2.42785700  |
| H  | 5.44252700  | -3.06931800 | 1.74682900  |
| H  | 4.33832400  | -1.84525800 | 2.41604800  |
| C  | 3.84805900  | -3.89252500 | -0.35853500 |
| H  | 3.40758400  | -3.73502500 | -1.34616200 |
| H  | 4.89591200  | -4.18144100 | -0.47992300 |
| H  | 3.31227600  | -4.71114800 | 0.12963700  |
| C  | 3.57684000  | -0.57372900 | -0.53625500 |
| O  | 2.32587000  | -0.86098900 | -0.08972800 |
| O  | 3.86572200  | 0.42851400  | -1.12913600 |

---

| Route 11 | CP11-1      | HF=-1481.2218459 |             |
|----------|-------------|------------------|-------------|
| C        | -4.81527600 | -2.05845200      | 1.01330300  |
| C        | -4.77944800 | -2.30911400      | -0.31953200 |
| C        | -3.01434600 | -0.98905800      | 0.16981800  |
| N        | -3.72920100 | -1.25121300      | 1.29119400  |
| H        | -5.50569900 | -2.38658600      | 1.77488700  |
| H        | -5.43470400 | -2.89717400      | -0.94333300 |
| N        | -3.67066900 | -1.65019100      | -0.81469200 |
| C        | -3.29854300 | -1.62274000      | -2.22834300 |
| H        | -3.36108300 | -2.64673500      | -2.61047600 |
| H        | -2.24878800 | -1.32057900      | -2.26789300 |
| C        | -4.17032100 | -0.67828700      | -3.04527800 |
| H        | -3.84926200 | -0.68782700      | -4.09072900 |
| H        | -5.22271500 | -0.97491100      | -3.01438600 |
| H        | -4.09167600 | 0.34568800       | -2.66949600 |
| C        | -3.41481700 | -0.74653600      | 2.61858800  |
| H        | -3.33131400 | -1.57670800      | 3.32418200  |
| H        | -2.46377500 | -0.21631400      | 2.57678500  |
| H        | -4.19525600 | -0.06028600      | 2.95743400  |
| Ag       | -1.27341100 | 0.20264400       | 0.00324900  |
| C        | 1.53541900  | 5.04626100       | 0.42946100  |
| H        | 2.25526900  | 5.72889300       | 0.82221000  |
| C        | 0.71451300  | 4.27808300       | -0.01333600 |
| C        | -0.29522700 | 3.36082200       | -0.56777200 |
| O        | 0.03190600  | 2.01805900       | -0.15673300 |
| C        | -1.66888600 | 3.67800500       | 0.02281200  |
| H        | -1.96402100 | 4.70078900       | -0.22281900 |
| H        | -2.41568500 | 2.99013200       | -0.38915400 |
| H        | -1.64685600 | 3.57230600       | 1.11011200  |
| C        | -0.30756800 | 3.44651100       | -2.09797000 |
| H        | 0.67099400  | 3.18154900       | -2.50677400 |
| H        | -1.05737500 | 2.75638000       | -2.49799600 |
| H        | -0.55284800 | 4.45991800       | -2.42635200 |

|   |             |             |             |
|---|-------------|-------------|-------------|
| C | 1.07415000  | 1.11010700  | 2.73970800  |
| O | 2.21051100  | 1.26815400  | 2.52982500  |
| O | -0.05818200 | 0.93933100  | 2.97497900  |
| H | 0.90828700  | 1.71572300  | -0.53769000 |
| C | 5.51484800  | -1.64171700 | -0.65021700 |
| C | 4.80857400  | -2.79359100 | -0.47889200 |
| C | 3.36536200  | -1.11038300 | -0.52623400 |
| N | 4.60908200  | -0.61106900 | -0.68096600 |
| H | 6.57568500  | -1.47562800 | -0.75280200 |
| H | 5.13912000  | -3.81826200 | -0.41164700 |
| N | 3.48218300  | -2.44797500 | -0.40250100 |
| C | 2.39842800  | -3.42352000 | -0.18215900 |
| H | 2.69687200  | -4.33139200 | -0.71339700 |
| H | 1.50161600  | -3.01499700 | -0.64441600 |
| C | 2.16668900  | -3.68704500 | 1.29784000  |
| H | 1.38723400  | -4.44582100 | 1.40997800  |
| H | 3.07056400  | -4.05443600 | 1.79242000  |
| H | 1.82999900  | -2.77334500 | 1.79166800  |
| C | 4.97937600  | 0.79729300  | -0.84871000 |
| H | 6.06462500  | 0.86223400  | -0.76949800 |
| H | 4.64356300  | 1.15547600  | -1.82093600 |
| H | 4.50549300  | 1.39721000  | -0.07410600 |
| C | 2.08575400  | -0.29247500 | -0.50170500 |
| O | 2.21369500  | 0.86363000  | -0.96388500 |
| O | 1.08084800  | -0.86059900 | -0.02018800 |

---

| Route 11 | TS11-1     | HF=-1481.1868206 |             |
|----------|------------|------------------|-------------|
| C        | 5.58855600 | -0.82590000      | -0.14489000 |
| C        | 5.06438700 | -1.19873900      | 1.05026500  |
| C        | 3.38614100 | -0.34083900      | -0.18749800 |
| N        | 4.54705400 | -0.30291900      | -0.88551700 |
| H        | 6.59593100 | -0.89295000      | -0.52568600 |
| H        | 5.52982100 | -1.64903900      | 1.91334700  |
| N        | 3.71759500 | -0.89778300      | 1.00171500  |

|    |             |             |             |
|----|-------------|-------------|-------------|
| C  | 2.78982600  | -1.08807400 | 2.11714100  |
| H  | 2.97852000  | -2.08135300 | 2.53739900  |
| H  | 1.78276600  | -1.09190700 | 1.69251900  |
| C  | 2.93365100  | -0.00853500 | 3.18215500  |
| H  | 2.22211200  | -0.19051000 | 3.99268700  |
| H  | 3.93888700  | 0.00169500  | 3.61348000  |
| H  | 2.73075800  | 0.98044700  | 2.76165600  |
| C  | 4.69330400  | 0.21072700  | -2.23864000 |
| H  | 5.00932200  | -0.58727800 | -2.91520400 |
| H  | 3.73001200  | 0.60074600  | -2.56789400 |
| H  | 5.43077200  | 1.01669400  | -2.25627500 |
| Ag | 1.50129100  | 0.34138300  | -0.79913000 |
| C  | -4.09292800 | 3.80109300  | 0.11819000  |
| H  | -5.08387500 | 4.02896600  | -0.20510300 |
| C  | -2.95197000 | 3.57894100  | 0.44723700  |
| C  | -1.59260700 | 3.34122100  | 0.94688400  |
| O  | -0.96513300 | 2.22671100  | 0.21458500  |
| C  | -0.71134000 | 4.58234600  | 0.80919700  |
| H  | -1.12121000 | 5.38305400  | 1.43006000  |
| H  | 0.29860500  | 4.35060500  | 1.16092400  |
| H  | -0.67291600 | 4.92095600  | -0.22488700 |
| C  | -1.64593300 | 2.87216000  | 2.40556700  |
| H  | -2.25545900 | 1.97179600  | 2.51084800  |
| H  | -0.63358100 | 2.66820200  | 2.76541100  |
| H  | -2.08735100 | 3.65813600  | 3.02267500  |
| C  | -0.75575600 | 2.30802200  | -1.33419800 |
| O  | -1.13110300 | 3.31406900  | -1.86341500 |
| O  | -0.23937900 | 1.22644300  | -1.68437200 |
| H  | -1.52833000 | 1.19847900  | 0.39250500  |
| C  | -4.65027900 | -3.01466800 | -0.47731700 |
| C  | -3.76506700 | -3.97800400 | -0.09513200 |
| C  | -2.76408800 | -2.01306900 | 0.10978200  |
| N  | -4.01962900 | -1.80479200 | -0.34206500 |
| H  | -5.66659100 | -3.09457800 | -0.82991400 |

|   |             |             |             |
|---|-------------|-------------|-------------|
| H | -3.87052500 | -5.05053600 | -0.04608700 |
| N | -2.60426600 | -3.34313300 | 0.26358900  |
| C | -1.39041800 | -4.05912900 | 0.70336800  |
| H | -1.74295800 | -4.93436700 | 1.25526200  |
| H | -0.85728000 | -3.40022600 | 1.38612000  |
| C | -0.50900500 | -4.45192500 | -0.47248100 |
| H | 0.35334200  | -5.01235600 | -0.10112500 |
| H | -1.04311300 | -5.08697600 | -1.18498500 |
| H | -0.14378600 | -3.56042500 | -0.98639500 |
| C | -4.64910300 | -0.52100900 | -0.67393100 |
| H | -5.62826600 | -0.73942200 | -1.09930900 |
| H | -4.74752500 | 0.08918600  | 0.22209200  |
| H | -4.03853500 | 0.01575800  | -1.39845000 |
| C | -1.72386600 | -0.95231900 | 0.38661900  |
| O | -2.24496100 | 0.21158900  | 0.46308700  |
| O | -0.55024400 | -1.30021000 | 0.50330100  |

---

| Route 11 | CP11-2      | HF=-1481.2029094 |             |
|----------|-------------|------------------|-------------|
| C        | -1.05165000 | -4.03184000      | 0.92580300  |
| C        | -1.71046100 | -4.28431200      | -0.23443900 |
| C        | -1.91738100 | -2.08370900      | 0.20239100  |
| N        | -1.19538800 | -2.68320800      | 1.17664500  |
| H        | -0.50016100 | -4.68792200      | 1.58101200  |
| H        | -1.85259400 | -5.20480400      | -0.77901900 |
| N        | -2.22942700 | -3.07861200      | -0.66181300 |
| C        | -3.06486700 | -2.92402900      | -1.85214600 |
| H        | -2.59690000 | -3.49154500      | -2.66246800 |
| H        | -3.02379000 | -1.86772200      | -2.12979200 |
| C        | -4.50096900 | -3.37612900      | -1.62290000 |
| H        | -5.08407000 | -3.23727100      | -2.53767600 |
| H        | -4.54933700 | -4.43441200      | -1.35103500 |
| H        | -4.96928000 | -2.79608800      | -0.82252500 |
| C        | -0.57679200 | -1.98587400      | 2.29862900  |
| H        | 0.39502800  | -1.57377100      | 2.00777300  |

|    |             |             |             |
|----|-------------|-------------|-------------|
| H  | -1.23852400 | -1.17987100 | 2.62034000  |
| H  | -0.45664600 | -2.68593700 | 3.12721600  |
| Ag | -2.35099400 | -0.00905100 | 0.06501700  |
| C  | -3.92830500 | 1.70441100  | -0.25799700 |
| H  | -4.84083400 | 1.27837900  | -0.62109900 |
| C  | -3.00618300 | 2.40675900  | 0.13252200  |
| C  | -2.05900700 | 3.42869300  | 0.63514900  |
| O  | -0.96957300 | 3.63370400  | -0.28335400 |
| C  | -2.80597300 | 4.77123800  | 0.60999500  |
| H  | -3.67417900 | 4.74019100  | 1.27189800  |
| H  | -2.12188700 | 5.55251900  | 0.94993100  |
| H  | -3.13179300 | 5.00771600  | -0.40465800 |
| C  | -1.56219400 | 3.11194200  | 2.04799500  |
| H  | -1.01345900 | 2.17033700  | 2.07939500  |
| H  | -0.89950400 | 3.91903700  | 2.37148800  |
| H  | -2.40797000 | 3.05929400  | 2.73851800  |
| C  | -0.02527500 | 2.70343900  | -0.56645500 |
| O  | -0.28402400 | 1.48777900  | -0.10273500 |
| O  | 0.94477800  | 3.03008000  | -1.20725000 |
| H  | 0.51190000  | 0.83053700  | -0.36324700 |
| C  | 5.60841000  | 0.33858500  | -1.72993000 |
| C  | 6.07150500  | -0.38841100 | -0.67467700 |
| C  | 3.87231300  | -0.19991700 | -0.46241300 |
| N  | 4.24849100  | 0.44575500  | -1.58629900 |
| H  | 6.13235000  | 0.78346000  | -2.56115300 |
| H  | 7.07234800  | -0.69866300 | -0.41826200 |
| N  | 4.98691100  | -0.71302400 | 0.09957700  |
| C  | 5.08684600  | -1.46549000 | 1.36434900  |
| H  | 5.91450300  | -2.16757600 | 1.23137300  |
| H  | 4.15865300  | -2.02179600 | 1.48083300  |
| C  | 5.31295300  | -0.54614800 | 2.55479900  |
| H  | 5.42692200  | -1.15071700 | 3.45888100  |
| H  | 6.21676400  | 0.05831900  | 2.43485900  |
| H  | 4.45081900  | 0.11028100  | 2.68799700  |

|   |            |             |             |
|---|------------|-------------|-------------|
| C | 3.38647500 | 1.16369500  | -2.53397600 |
| H | 4.03971200 | 1.72954500  | -3.19865800 |
| H | 2.79717800 | 0.44683400  | -3.10558300 |
| H | 2.70706500 | 1.83032700  | -2.00250300 |
| C | 2.45792500 | -0.30120600 | 0.08267000  |
| O | 1.57832400 | 0.02933800  | -0.76722000 |
| O | 2.33500700 | -0.67338400 | 1.25398100  |

---

| Route 11 | TS11-2      | HF=-1481.1734269 |             |
|----------|-------------|------------------|-------------|
| C        | 4.09195000  | -1.67453300      | 2.04904800  |
| C        | 4.92466500  | -1.42539800      | 1.00675100  |
| C        | 3.04239800  | -0.22261900      | 0.67326000  |
| N        | 2.94744600  | -0.93482600      | 1.82260200  |
| H        | 4.21911800  | -2.29772300      | 2.92069800  |
| H        | 5.91344200  | -1.79891000      | 0.78972900  |
| N        | 4.26631100  | -0.53431900      | 0.18205100  |
| C        | 4.80618600  | -0.03874800      | -1.08393000 |
| H        | 5.85804200  | 0.21459500       | -0.91937000 |
| H        | 4.27636500  | 0.89065200       | -1.30755500 |
| C        | 4.65284800  | -1.04084700      | -2.22019400 |
| H        | 5.07520800  | -0.62565300      | -3.13959600 |
| H        | 5.17583700  | -1.97677100      | -2.00229900 |
| H        | 3.59733100  | -1.26566100      | -2.39755100 |
| C        | 1.82561900  | -0.86557900      | 2.74678200  |
| H        | 2.00777000  | -0.11075800      | 3.51675700  |
| H        | 0.91970300  | -0.61321800      | 2.19447700  |
| H        | 1.69058800  | -1.83820300      | 3.22432100  |
| Ag       | 1.63829300  | 1.15890900       | -0.12769700 |
| C        | 0.51067800  | 2.85087000       | -0.79179900 |
| H        | 1.10853700  | 3.50906300       | -1.41746200 |
| C        | -0.66996300 | 3.14111200       | -0.44654300 |
| C        | -1.88153700 | 3.97775800       | -0.26417400 |
| O        | -3.04666500 | 3.13940000       | -0.39953000 |
| C        | -1.90759600 | 4.65190500       | 1.10927800  |

|   |             |             |             |
|---|-------------|-------------|-------------|
| H | -1.06026600 | 5.33405000  | 1.21491600  |
| H | -2.83535000 | 5.22107600  | 1.21008400  |
| H | -1.85802900 | 3.90698300  | 1.90589300  |
| C | -1.94415500 | 4.99517800  | -1.40593100 |
| H | -1.96107400 | 4.48958500  | -2.37335400 |
| H | -2.85892000 | 5.58334500  | -1.29854700 |
| H | -1.08774700 | 5.67214700  | -1.36433200 |
| C | -2.88934400 | 1.88735600  | 0.07105600  |
| O | -1.65181800 | 1.69082500  | 0.52059300  |
| O | -3.78483600 | 1.07627700  | 0.04924300  |
| C | -2.59099400 | -4.50848800 | -1.32262100 |
| C | -3.52893900 | -4.07504900 | -0.43331200 |
| C | -1.92011600 | -2.55873100 | -0.51041900 |
| N | -1.60523600 | -3.55689300 | -1.36392000 |
| H | -2.55102600 | -5.40281500 | -1.92438100 |
| H | -4.46169700 | -4.51994500 | -0.12381000 |
| N | -3.10201600 | -2.86924800 | 0.05920600  |
| C | -3.87587200 | -2.07791200 | 1.04319000  |
| H | -4.92267100 | -2.33034600 | 0.85533300  |
| H | -3.73406900 | -1.02224400 | 0.80692700  |
| C | -3.47539000 | -2.40167300 | 2.47375100  |
| H | -4.10497200 | -1.82284300 | 3.15501900  |
| H | -3.61044100 | -3.46232500 | 2.70675000  |
| H | -2.43537100 | -2.12067100 | 2.64966800  |
| C | -0.42826200 | -3.63221900 | -2.23134600 |
| H | -0.40871800 | -4.62763800 | -2.67500000 |
| H | -0.48994400 | -2.86826600 | -3.00543400 |
| H | 0.47525000  | -3.46433700 | -1.64754200 |
| C | -1.09393200 | -1.30910500 | -0.31493000 |
| O | -0.27348800 | -1.03710800 | -1.18692100 |
| O | -1.36148900 | -0.67710600 | 0.76835100  |
| H | -1.42532100 | 0.56714800  | 0.64645300  |

---

Route 11 CP11-3

HF=-1481.2079782

---

---

|    |             |             |             |
|----|-------------|-------------|-------------|
| C  | 5.34584900  | -2.24459200 | -0.49421600 |
| C  | 4.58700100  | -2.96454200 | 0.37008200  |
| C  | 3.33775600  | -1.21829500 | -0.33586200 |
| N  | 4.56558800  | -1.18426100 | -0.91144400 |
| H  | 6.35405900  | -2.39957800 | -0.84620700 |
| H  | 4.80954300  | -3.86628500 | 0.91934500  |
| N  | 3.36602100  | -2.32355500 | 0.44910800  |
| C  | 2.26904900  | -2.75323600 | 1.31410100  |
| H  | 2.16270300  | -3.83723500 | 1.20176100  |
| H  | 1.35987100  | -2.29020000 | 0.92269200  |
| C  | 2.49433000  | -2.37575100 | 2.77272600  |
| H  | 1.65227000  | -2.71903600 | 3.38080500  |
| H  | 3.40453200  | -2.83326500 | 3.17138400  |
| H  | 2.58008600  | -1.29125700 | 2.88475600  |
| C  | 5.01320600  | -0.17435400 | -1.85730600 |
| H  | 5.26639300  | -0.63788200 | -2.81415200 |
| H  | 4.20459000  | 0.54104500  | -2.00874000 |
| H  | 5.88811800  | 0.34955300  | -1.46432700 |
| Ag | 1.75188100  | 0.16942000  | -0.61166200 |
| C  | 0.27179400  | 1.60318300  | -1.01366200 |
| H  | -0.11984900 | 1.64718400  | -2.03550700 |
| C  | 0.00129400  | 2.72941000  | -0.33626100 |
| C  | 0.38910900  | 3.17763500  | 1.06531400  |
| O  | -0.41373500 | 4.37211900  | 1.23790300  |
| C  | 0.00141700  | 2.18877100  | 2.15533500  |
| H  | 0.55280700  | 1.25444700  | 2.01866400  |
| H  | 0.24254400  | 2.59999400  | 3.13921000  |
| H  | -1.06994700 | 1.97465600  | 2.11972700  |
| C  | 1.85868600  | 3.58364500  | 1.14620000  |
| H  | 2.10266000  | 4.31116900  | 0.36762300  |
| H  | 2.06998600  | 4.02984800  | 2.12198300  |
| H  | 2.49269200  | 2.70329400  | 1.00848800  |
| C  | -1.03852100 | 4.69378600  | 0.09295500  |
| O  | -0.76419700 | 3.75305500  | -0.86793000 |

|   |             |             |             |
|---|-------------|-------------|-------------|
| O | -1.74550300 | 5.63849600  | -0.08238100 |
| C | -5.89832600 | -1.16241400 | -0.32812100 |
| C | -5.56995400 | -2.42296400 | 0.07789500  |
| C | -3.70007700 | -1.25545600 | -0.09657700 |
| N | -4.73402100 | -0.44966700 | -0.43072100 |
| H | -6.85950300 | -0.72362200 | -0.54622700 |
| H | -6.19299200 | -3.28065400 | 0.27856300  |
| N | -4.20976700 | -2.46480400 | 0.21875900  |
| C | -3.47564000 | -3.68743000 | 0.61428900  |
| H | -4.16828300 | -4.25324900 | 1.24212400  |
| H | -2.62611300 | -3.37521200 | 1.21877400  |
| C | -3.02315800 | -4.49595000 | -0.59204000 |
| H | -2.53519000 | -5.40946100 | -0.24176300 |
| H | -3.86653000 | -4.78499000 | -1.22545900 |
| H | -2.30066200 | -3.93250800 | -1.18602400 |
| C | -4.69046900 | 0.96073700  | -0.84202900 |
| H | -5.70773200 | 1.25743500  | -1.09405400 |
| H | -4.31181700 | 1.57576000  | -0.02703600 |
| H | -4.04160600 | 1.07764300  | -1.70829900 |
| C | -2.23964800 | -0.90532300 | -0.06559800 |
| O | -1.40324100 | -1.76008600 | 0.14874900  |
| O | -2.06413500 | 0.36794600  | -0.28936400 |
| H | -1.07148200 | 0.67227500  | -0.38910000 |

---

| Route 11 | TS11-3     | HF=-1481.2051937 |             |
|----------|------------|------------------|-------------|
| C        | 4.87989800 | -2.84507500      | -0.50178700 |
| C        | 4.05849200 | -3.48384900      | 0.36924000  |
| C        | 3.00185100 | -1.60360300      | -0.30323200 |
| N        | 4.21673200 | -1.70060100      | -0.89856700 |
| H        | 5.85895800 | -3.10794200      | -0.87148300 |
| H        | 4.18706100 | -4.40963000      | 0.90842200  |
| N        | 2.91795700 | -2.71182300      | 0.47280900  |
| C        | 1.79249200 | -3.02456900      | 1.35183800  |
| H        | 1.57810900 | -4.09312700      | 1.24643600  |

|    |             |             |             |
|----|-------------|-------------|-------------|
| H  | 0.92948900  | -2.47560700 | 0.96711200  |
| C  | 2.07223300  | -2.66551800 | 2.80564000  |
| H  | 1.20755100  | -2.91987600 | 3.42558900  |
| H  | 2.93685300  | -3.21033400 | 3.19581100  |
| H  | 2.26752900  | -1.59455100 | 2.91048200  |
| C  | 4.75821500  | -0.74037300 | -1.84714800 |
| H  | 4.94336300  | -1.22317800 | -2.80999300 |
| H  | 4.03088500  | 0.06035800  | -1.98239900 |
| H  | 5.69171600  | -0.31816600 | -1.46670200 |
| Ag | 1.57736100  | -0.04728700 | -0.54789600 |
| C  | 0.29590500  | 1.58870000  | -0.96022500 |
| H  | -0.04515500 | 1.67541000  | -1.99715100 |
| C  | 0.36027400  | 2.79515700  | -0.36810700 |
| C  | 0.80844200  | 3.20569300  | 1.02711200  |
| O  | 0.39560700  | 4.59324500  | 1.08360200  |
| C  | 0.09844900  | 2.45343800  | 2.14356000  |
| H  | 0.35248000  | 1.39117700  | 2.09439600  |
| H  | 0.41070300  | 2.84476600  | 3.11538400  |
| H  | -0.98538800 | 2.56029400  | 2.05505700  |
| C  | 2.32824100  | 3.16816900  | 1.17617300  |
| H  | 2.81073300  | 3.72603200  | 0.36919900  |
| H  | 2.61773500  | 3.61398900  | 2.13180100  |
| H  | 2.67998100  | 2.13306100  | 1.14213400  |
| C  | -0.04767600 | 5.00589100  | -0.11493100 |
| O  | -0.03746500 | 3.95123100  | -1.00048400 |
| O  | -0.41434200 | 6.10432700  | -0.39453300 |
| H  | -0.92886300 | 0.83548000  | -0.28436200 |
| C  | -5.93331400 | -0.62890900 | -0.15506200 |
| C  | -5.69682500 | -1.95168800 | 0.07781200  |
| C  | -3.74192600 | -0.92018200 | -0.03110200 |
| N  | -4.71704100 | -0.00210000 | -0.21860000 |
| H  | -6.86130300 | -0.09242600 | -0.27705400 |
| H  | -6.38119400 | -2.77716500 | 0.19738100  |
| N  | -4.33992900 | -2.11592900 | 0.15373800  |

|   |             |             |             |
|---|-------------|-------------|-------------|
| C | -3.69694300 | -3.43258600 | 0.35610300  |
| H | -4.40609200 | -4.01715400 | 0.94744700  |
| H | -2.79648800 | -3.26684100 | 0.94436200  |
| C | -3.37064900 | -4.11424600 | -0.96405600 |
| H | -2.94708500 | -5.10098800 | -0.75838500 |
| H | -4.26381400 | -4.25148000 | -1.58008200 |
| H | -2.63085200 | -3.53685600 | -1.52226700 |
| C | -4.56749900 | 1.43896900  | -0.45829800 |
| H | -5.56207800 | 1.84385900  | -0.64174100 |
| H | -4.12185900 | 1.91715300  | 0.41261900  |
| H | -3.92868900 | 1.60887600  | -1.32315100 |
| C | -2.25400800 | -0.68431300 | -0.02250200 |
| O | -1.97604500 | 0.58102100  | -0.06615800 |
| O | -1.49253300 | -1.63559000 | 0.02137700  |

---



---

Route 11

CP11-4

HF=-1481.2553557

|   |            |             |             |
|---|------------|-------------|-------------|
| C | 5.34340200 | 0.53696700  | -0.94354300 |
| C | 5.64345600 | -0.23252700 | 0.13354900  |
| C | 3.42979100 | -0.43099100 | -0.24834000 |
| N | 3.98604100 | 0.40404600  | -1.15784800 |
| H | 5.97207500 | 1.15164500  | -1.56895400 |
| H | 6.58339400 | -0.41092000 | 0.63247100  |
| N | 4.46126400 | -0.81814400 | 0.54056600  |
| C | 4.33599500 | -1.68569400 | 1.71132700  |
| H | 5.17986900 | -2.38246200 | 1.69989300  |
| H | 3.42416100 | -2.27165600 | 1.57001900  |
| C | 4.28495100 | -0.90331200 | 3.01689100  |
| H | 4.19166200 | -1.59449400 | 3.85934300  |
| H | 5.19285400 | -0.31149100 | 3.16552600  |
| H | 3.42613100 | -0.22624300 | 3.02961600  |
| C | 3.26992900 | 1.04205000  | -2.25333200 |
| H | 3.54879400 | 2.09687100  | -2.30551000 |
| H | 3.51760200 | 0.55563200  | -3.20076100 |
| H | 2.19696100 | 0.96563100  | -2.07345000 |

|    |             |             |             |
|----|-------------|-------------|-------------|
| Ag | 1.41819500  | -1.00832000 | -0.10803200 |
| C  | -2.37848500 | 2.98198600  | -0.15595600 |
| C  | -1.05898300 | 3.57938700  | 0.29836600  |
| O  | -0.10737000 | 2.73993900  | -0.42163400 |
| C  | -0.86863300 | 5.01591000  | -0.17020100 |
| H  | -1.58959100 | 5.66854900  | 0.32927800  |
| H  | 0.13899800  | 5.36070000  | 0.07677100  |
| H  | -1.01826800 | 5.09937100  | -1.24940700 |
| C  | -0.80785900 | 3.39823500  | 1.79007200  |
| H  | -0.88515700 | 2.34357000  | 2.06283900  |
| H  | 0.19000000  | 3.76378100  | 2.04751600  |
| H  | -1.54291600 | 3.97159800  | 2.36197600  |
| C  | -0.74058800 | 1.79934000  | -1.11997500 |
| O  | -2.08948400 | 1.93215900  | -1.00394800 |
| O  | -0.21609400 | 0.94353700  | -1.78432700 |
| C  | -5.02551700 | -1.84515900 | 0.84499100  |
| C  | -4.69882700 | -2.60540600 | -0.23723900 |
| C  | -2.85216300 | -1.60691700 | 0.47251800  |
| N  | -3.87414500 | -1.23174200 | 1.26996500  |
| H  | -5.97064300 | -1.69972400 | 1.34395000  |
| H  | -5.30947600 | -3.23815700 | -0.86202700 |
| N  | -3.35183400 | -2.45453200 | -0.44974600 |
| C  | -2.62927700 | -3.08056600 | -1.57594100 |
| H  | -3.20272200 | -3.97454400 | -1.83386900 |
| H  | -1.65191400 | -3.37675000 | -1.19930700 |
| C  | -2.49766900 | -2.13665700 | -2.76235900 |
| H  | -1.99570000 | -2.66256800 | -3.57937300 |
| H  | -3.47561200 | -1.80544200 | -3.12397600 |
| H  | -1.89599900 | -1.26223300 | -2.50300900 |
| C  | -3.80955500 | -0.31149900 | 2.40724600  |
| H  | -4.75139400 | -0.39295800 | 2.95024500  |
| H  | -2.97567400 | -0.57885900 | 3.05292300  |
| H  | -3.66098900 | 0.70685100  | 2.04787600  |
| C  | -1.42216900 | -1.12583000 | 0.61524900  |

|   |             |             |             |
|---|-------------|-------------|-------------|
| O | -1.24656000 | -0.12204700 | 1.31182400  |
| O | -0.57795400 | -1.83125900 | -0.01462500 |
| C | -3.62621800 | 3.33093100  | 0.13320900  |
| H | -4.46972000 | 2.81032400  | -0.30416400 |
| H | -3.82094100 | 4.16750700  | 0.79301400  |

---

| Route O1 | CPO1-1      | HF=-1424.2412438 |             |
|----------|-------------|------------------|-------------|
| C        | 1.42605000  | 3.17338100       | 1.32276200  |
| C        | 0.73427900  | 4.15473800       | 0.68902000  |
| C        | -0.45363300 | 2.24200000       | 0.49817700  |
| N        | 0.68487300  | 2.01719400       | 1.19390300  |
| H        | 2.36857200  | 3.19669600       | 1.84674700  |
| H        | 0.95737400  | 5.20134700       | 0.55107800  |
| N        | -0.41352000 | 3.56568100       | 0.19594800  |
| C        | -1.41520400 | 4.25696200       | -0.60918800 |
| H        | -1.58297800 | 5.24230900       | -0.16179400 |
| H        | -2.34236800 | 3.68611900       | -0.51179300 |
| C        | -1.00833600 | 4.37953300       | -2.07215500 |
| H        | -1.78994700 | 4.89866200       | -2.63485700 |
| H        | -0.07690300 | 4.94307800       | -2.18333400 |
| H        | -0.86643600 | 3.38911900       | -2.51363000 |
| C        | 1.07464000  | 0.73580200       | 1.77171500  |
| H        | 0.91614500  | 0.75680400       | 2.85408800  |
| H        | 0.46773900  | -0.05171200      | 1.32276700  |
| H        | 2.12750700  | 0.54390500       | 1.54727400  |
| Ag       | -1.94431000 | 0.86431100       | -0.04917200 |
| C        | -1.85031900 | -2.57068600      | 2.56418800  |
| O        | -2.08092600 | -1.44280900      | 2.76608000  |
| O        | -1.62111300 | -3.70523700      | 2.41482700  |
| H        | -1.43772800 | -1.87312200      | -0.19529500 |
| C        | 2.85683300  | -1.43712500      | -0.60286700 |
| C        | 1.71827600  | -1.81627200      | -0.78365200 |
| C        | 0.33256700  | -2.26994800      | -0.99931300 |
| O        | -0.47487100 | -1.61832700      | -0.03132800 |

|   |             |             |             |
|---|-------------|-------------|-------------|
| C | -0.11371600 | -1.88587800 | -2.42177000 |
| H | 0.50778100  | -2.37195000 | -3.17995800 |
| H | -1.15292500 | -2.19767800 | -2.56196700 |
| H | -0.05074800 | -0.80275100 | -2.55613700 |
| C | 0.25464600  | -3.79473300 | -0.80502100 |
| H | 0.55523100  | -4.05800500 | 0.21145100  |
| H | -0.77973100 | -4.11798600 | -0.95536200 |
| H | 0.89943400  | -4.32118200 | -1.51550200 |
| C | 4.19812800  | -0.99684800 | -0.38451100 |
| C | 5.25672000  | -1.56572200 | -1.11401700 |
| C | 5.64500000  | 0.37698200  | 0.74831900  |
| C | 6.55060600  | -1.12096800 | -0.87803000 |
| H | 5.04727200  | -2.33972600 | -1.84469200 |
| H | 5.76904400  | 1.15408400  | 1.50165300  |
| H | 7.38564500  | -1.54528800 | -1.42865600 |
| C | 6.75698100  | -0.12611200 | 0.07535200  |
| H | 7.75048600  | 0.25173400  | 0.29509800  |
| N | 4.39361300  | -0.03190800 | 0.53789200  |
| C | -3.83656600 | -1.41645400 | -0.67441300 |
| O | -3.70227900 | -0.14892400 | -0.67334200 |
| O | -2.95058900 | -2.26073400 | -0.40171400 |
| C | -5.22453600 | -1.91677400 | -1.03967400 |
| H | -5.93903300 | -1.58735400 | -0.27871400 |
| H | -5.54046500 | -1.47445500 | -1.98868000 |
| H | -5.24143700 | -3.00505300 | -1.10862200 |

---

| Route O1 | TSO1-1      | HF=-1424.2189255 |             |
|----------|-------------|------------------|-------------|
| C        | -0.69559800 | 4.12453000       | -0.78396500 |
| C        | 0.31554100  | 4.56821500       | 0.00680300  |
| C        | 0.66070500  | 2.36738300       | -0.37632100 |
| N        | -0.46347200 | 2.78258600       | -1.00720600 |
| H        | -1.53993300 | 4.64566100       | -1.20772800 |
| H        | 0.52387600  | 5.55078600       | 0.40101800  |
| N        | 1.13383800  | 3.47971500       | 0.24035300  |

|    |             |             |             |
|----|-------------|-------------|-------------|
| C  | 2.33063700  | 3.50307700  | 1.07492300  |
| H  | 2.90775100  | 4.39651700  | 0.81339700  |
| H  | 2.92237800  | 2.62908300  | 0.79139300  |
| C  | 2.00600500  | 3.47644400  | 2.56315200  |
| H  | 2.93138500  | 3.48809200  | 3.14671500  |
| H  | 1.40610000  | 4.34225800  | 2.86036000  |
| H  | 1.45015800  | 2.56966300  | 2.81739500  |
| C  | -1.33554500 | 1.91130600  | -1.78637400 |
| H  | -1.69193000 | 2.45444400  | -2.66508800 |
| H  | -0.75640300 | 1.04690200  | -2.11400300 |
| H  | -2.18382700 | 1.57064600  | -1.18272300 |
| Ag | 1.41720700  | 0.38194000  | -0.36525900 |
| C  | 0.29933100  | -2.04901800 | -1.82321500 |
| O  | 0.96717600  | -1.18232400 | -2.34696500 |
| O  | -0.49928900 | -2.92161100 | -1.99563400 |
| H  | 2.16924900  | -2.37768600 | 0.01263800  |
| C  | -2.58944600 | -1.29667300 | 0.57138500  |
| C  | -1.49302600 | -1.80490300 | 0.68730600  |
| C  | -0.15312500 | -2.38819600 | 0.88901500  |
| O  | 0.73702700  | -1.90380300 | -0.11712700 |
| C  | 0.38633500  | -1.90351100 | 2.24634400  |
| H  | -0.26175700 | -2.23495900 | 3.06303900  |
| H  | 1.38850700  | -2.31327600 | 2.40462500  |
| H  | 0.44267200  | -0.81105800 | 2.26476300  |
| C  | -0.22284400 | -3.92355100 | 0.86727000  |
| H  | -0.57779600 | -4.26739000 | -0.10372000 |
| H  | 0.77788100  | -4.32901500 | 1.04794600  |
| H  | -0.89348100 | -4.28910700 | 1.65109500  |
| C  | -3.91080800 | -0.76813400 | 0.44761900  |
| C  | -5.01189700 | -1.55863400 | 0.82302500  |
| C  | -5.29141400 | 0.97129900  | -0.12949900 |
| C  | -6.29026900 | -1.03046800 | 0.70804000  |
| H  | -4.84477700 | -2.56490100 | 1.19193400  |
| H  | -5.37094500 | 1.98606100  | -0.51748800 |

|   |             |             |             |
|---|-------------|-------------|-------------|
| H | -7.15607700 | -1.62261900 | 0.99134400  |
| C | -6.44091900 | 0.26651300  | 0.22160200  |
| H | -7.42021100 | 0.72186500  | 0.11316700  |
| N | -4.05340200 | 0.48672200  | -0.02535100 |
| C | 3.97005100  | -1.67109800 | 0.16460900  |
| O | 3.62737400  | -0.48860800 | 0.13404500  |
| O | 3.14796800  | -2.69048400 | 0.10576900  |
| C | 5.41648200  | -2.07940900 | 0.26817900  |
| H | 5.71416800  | -2.58178800 | -0.65741300 |
| H | 6.04490800  | -1.20383400 | 0.42746200  |
| H | 5.54738900  | -2.79706500 | 1.08238300  |

|          |        |                  |  |
|----------|--------|------------------|--|
| Route O1 | CPO1-2 | HF=-1424.2269357 |  |
|----------|--------|------------------|--|

|   |             |             |             |
|---|-------------|-------------|-------------|
| C | 2.06821500  | 4.18321600  | 0.83706800  |
| C | 3.14256200  | 3.70844000  | 0.15488000  |
| C | 1.63294600  | 2.04145500  | 0.28495800  |
| N | 1.15613000  | 3.14886700  | 0.90236100  |
| H | 1.87578000  | 5.15498500  | 1.26447400  |
| H | 4.06609400  | 4.18856200  | -0.12875700 |
| N | 2.85510600  | 2.39962400  | -0.17480100 |
| C | 3.78024600  | 1.49857200  | -0.86986900 |
| H | 4.17755400  | 2.03546000  | -1.73737400 |
| H | 3.19377400  | 0.65658600  | -1.24371800 |
| C | 4.89978500  | 1.00446000  | 0.03493500  |
| H | 5.50376100  | 0.27642400  | -0.51124500 |
| H | 5.54404600  | 1.82279900  | 0.37264200  |
| H | 4.48638900  | 0.50234800  | 0.91435600  |
| C | -0.12184100 | 3.21156600  | 1.59565800  |
| H | -0.49315400 | 4.23831100  | 1.56562400  |
| H | -0.84143400 | 2.55448500  | 1.09982600  |
| H | -0.00580900 | 2.90478900  | 2.63910200  |
| C | 3.33620300  | -2.41085700 | -1.12965900 |
| O | 4.41936000  | -2.00995600 | -1.49520300 |
| O | 2.21508900  | -1.79338000 | -1.55473300 |

|    |             |             |             |
|----|-------------|-------------|-------------|
| C  | 3.12581100  | -3.58823400 | -0.21034000 |
| H  | 2.55476900  | -4.36842200 | -0.72554600 |
| H  | 4.09286000  | -3.98994800 | 0.09081000  |
| H  | 2.54670900  | -3.28589100 | 0.67090300  |
| Ag | 0.74524300  | 0.15830000  | 0.11892400  |
| C  | -3.21842500 | -0.45276100 | -0.06752900 |
| C  | -2.81608800 | -1.57867300 | 0.14281000  |
| C  | -2.44947500 | -2.98222600 | 0.39697000  |
| O  | -1.31257500 | -3.09068000 | 1.27565700  |
| C  | -3.57935900 | -3.64959600 | 1.19384200  |
| H  | -4.51069800 | -3.63544500 | 0.62199600  |
| H  | -3.30400700 | -4.68641100 | 1.40575100  |
| H  | -3.73287100 | -3.12781900 | 2.14089900  |
| C  | -2.20293900 | -3.72985200 | -0.91898400 |
| H  | -1.41044300 | -3.24385700 | -1.48716900 |
| H  | -1.91164100 | -4.75962500 | -0.69021800 |
| H  | -3.11654100 | -3.74948500 | -1.52038300 |
| C  | -0.14248200 | -2.42542600 | 1.01308500  |
| O  | -0.08027700 | -1.81811400 | -0.13526200 |
| O  | 0.72267800  | -2.47261300 | 1.87592100  |
| H  | 1.40474600  | -2.07905800 | -1.06345400 |
| C  | -3.73758800 | 0.84227900  | -0.37323200 |
| C  | -4.99170600 | 0.94726300  | -1.00217800 |
| C  | -5.48986500 | 2.20550900  | -1.30957700 |
| H  | -5.54704400 | 0.04567600  | -1.23756200 |
| C  | -3.50173100 | 3.12320100  | -0.35746100 |
| H  | -6.45532600 | 2.30976900  | -1.79679300 |
| H  | -2.88222500 | 3.97757500  | -0.08759600 |
| N  | -3.00022000 | 1.92526800  | -0.05273700 |
| C  | -4.73039500 | 3.32640100  | -0.98184100 |
| H  | -5.07629300 | 4.33128300  | -1.20203500 |

---

| Route O1 | TS1-2       | HF=-1424.2029315 |            |
|----------|-------------|------------------|------------|
| C        | -4.95420700 | -1.09445100      | 0.09037600 |

---

|    |             |             |             |
|----|-------------|-------------|-------------|
| C  | -4.76272000 | -0.06557900 | -0.77483600 |
| C  | -2.74122500 | -0.64949600 | 0.02633600  |
| N  | -3.70584200 | -1.43682800 | 0.56947800  |
| H  | -5.85463400 | -1.60504500 | 0.39484100  |
| H  | -5.46722200 | 0.49605300  | -1.36834900 |
| N  | -3.40766600 | 0.18735600  | -0.80133600 |
| C  | -2.79142000 | 1.25876700  | -1.59498200 |
| H  | -3.17666800 | 1.17627200  | -2.61569700 |
| H  | -1.71854600 | 1.06801800  | -1.63830200 |
| C  | -3.06238600 | 2.63862800  | -1.01558100 |
| H  | -2.55287900 | 3.37742800  | -1.63777000 |
| H  | -4.13188900 | 2.87301200  | -0.99233100 |
| H  | -2.66718900 | 2.71773900  | 0.00141700  |
| C  | -3.46845900 | -2.50184100 | 1.52712000  |
| H  | -3.83576300 | -3.45384800 | 1.13459200  |
| H  | -2.39449300 | -2.57786500 | 1.70000000  |
| H  | -3.96950400 | -2.28199800 | 2.47377100  |
| C  | 0.59145200  | 2.67172700  | -2.12804400 |
| O  | -0.32627300 | 2.84123200  | -2.90610900 |
| O  | 0.65404500  | 1.54661300  | -1.39906500 |
| C  | 1.70969300  | 3.65829300  | -1.90255300 |
| H  | 2.67107700  | 3.19933800  | -2.15587700 |
| H  | 1.54827200  | 4.53836700  | -2.52443000 |
| H  | 1.75266300  | 3.93488800  | -0.84231500 |
| Ag | -0.64996100 | -0.74124300 | 0.39260700  |
| C  | 1.54602800  | -1.27523200 | 0.51413800  |
| C  | 1.58118400  | -0.26583000 | 1.29093700  |
| C  | 1.58235700  | 0.21468000  | 2.70837100  |
| O  | 1.28043900  | 1.60837000  | 2.71588100  |
| C  | 0.52781200  | -0.47890000 | 3.56621100  |
| H  | 0.69050100  | -1.55924300 | 3.56918600  |
| H  | 0.59060300  | -0.10270000 | 4.59101300  |
| H  | -0.47543700 | -0.26487500 | 3.18487200  |
| C  | 2.99326900  | -0.00092700 | 3.27863400  |

|   |            |             |             |
|---|------------|-------------|-------------|
| H | 3.73408600 | 0.48349600  | 2.63969000  |
| H | 3.03828500 | 0.43996300  | 4.27868500  |
| H | 3.22679400 | -1.06697000 | 3.34107700  |
| C | 1.69429100 | 2.26102600  | 1.56967500  |
| O | 2.21538600 | 1.45401000  | 0.69014900  |
| O | 1.51682700 | 3.45889200  | 1.47951600  |
| H | 1.37939000 | 1.57070400  | -0.71170000 |
| C | 2.13646400 | -1.79078700 | -0.70249200 |
| C | 1.39817000 | -2.57243700 | -1.60972600 |
| C | 2.01729300 | -3.03710800 | -2.76255100 |
| H | 0.35899900 | -2.80911900 | -1.39909800 |
| C | 4.02512200 | -2.00294600 | -1.98803500 |
| H | 1.45959400 | -3.62691800 | -3.48497200 |
| H | 5.08410000 | -1.77212700 | -2.09975700 |
| N | 3.44392900 | -1.52127200 | -0.89117600 |
| C | 3.36508400 | -2.75007700 | -2.96430000 |
| H | 3.89490000 | -3.09893800 | -3.84499300 |

---

| Route O1 | CPO1-3     | HF=-1424.2376136 |             |
|----------|------------|------------------|-------------|
| C        | 5.26625400 | -1.14421900      | 0.21364100  |
| C        | 5.17824300 | 0.20047000       | 0.04847600  |
| C        | 3.07237300 | -0.59710900      | 0.21606600  |
| N        | 3.96962000 | -1.61029000      | 0.31290200  |
| H        | 6.12539200 | -1.79414300      | 0.27490700  |
| H        | 5.94842200 | 0.94757500       | -0.06487000 |
| N        | 3.83403100 | 0.51329100       | 0.05553300  |
| C        | 3.29924900 | 1.86727600       | -0.11698100 |
| H        | 3.83850000 | 2.52772200       | 0.57008700  |
| H        | 2.25394300 | 1.83855800       | 0.19489100  |
| C        | 3.39146100 | 2.36797700       | -1.55075800 |
| H        | 2.89330900 | 3.33863800       | -1.61961300 |
| H        | 4.42831100 | 2.47957300       | -1.88386300 |
| H        | 2.87832800 | 1.68104800       | -2.22914200 |
| C        | 3.61579400 | -3.00516400      | 0.50729600  |

|    |             |             |             |
|----|-------------|-------------|-------------|
| H  | 4.06145200  | -3.38504000 | 1.43054100  |
| H  | 2.53014200  | -3.07573100 | 0.57945200  |
| H  | 3.96112200  | -3.60772100 | -0.33728100 |
| C  | -0.70885000 | 3.43323900  | -0.68521000 |
| O  | -0.07674500 | 4.44376200  | -0.87797300 |
| O  | -0.06277500 | 2.24653300  | -0.61548100 |
| C  | -2.20831700 | 3.37438300  | -0.51528900 |
| H  | -2.47590200 | 2.87438300  | 0.42113200  |
| H  | -2.61215000 | 4.38610500  | -0.52293500 |
| H  | -2.66267500 | 2.79981700  | -1.32923800 |
| Ag | 0.94779800  | -0.64524300 | 0.26934700  |
| C  | -1.16087900 | -0.49745900 | 0.36435500  |
| C  | -1.99888500 | -0.73829800 | -0.65304300 |
| C  | -1.72466200 | -1.22191200 | -2.07258100 |
| O  | -3.04189100 | -1.17545200 | -2.67400000 |
| C  | -0.81219300 | -0.31858000 | -2.89001200 |
| H  | 0.18246500  | -0.28317100 | -2.43688000 |
| H  | -0.72200000 | -0.70167100 | -3.91071700 |
| H  | -1.20758200 | 0.69896000  | -2.93396600 |
| C  | -1.25877300 | -2.67636100 | -2.08897200 |
| H  | -1.94744100 | -3.30596600 | -1.51955500 |
| H  | -1.20827700 | -3.04464400 | -3.11819100 |
| H  | -0.26835500 | -2.74955300 | -1.63084300 |
| C  | -3.97224800 | -0.85152500 | -1.75526500 |
| O  | -3.38403000 | -0.61818600 | -0.55189600 |
| O  | -5.14748000 | -0.76916500 | -1.96173000 |
| H  | -0.64705000 | 1.47946600  | -0.42673300 |
| C  | -1.71125500 | -0.22812100 | 1.71471400  |
| C  | -1.30792600 | 0.90298000  | 2.45087500  |
| C  | -1.82805200 | 1.11763300  | 3.72081500  |
| H  | -0.59118700 | 1.59630200  | 2.01938200  |
| C  | -3.04639800 | -0.91446600 | 3.45932400  |
| H  | -1.53416500 | 1.99368500  | 4.29375000  |
| H  | -3.73232700 | -1.67262100 | 3.83708900  |

|   |             |             |            |
|---|-------------|-------------|------------|
| N | -2.56849500 | -1.12849200 | 2.23262800 |
| C | -2.72319200 | 0.18855200  | 4.24708600 |
| H | -3.15196000 | 0.30758300  | 5.23726300 |

---

| Route O1 | TS1-3       | HF=-1424.2256899 |             |
|----------|-------------|------------------|-------------|
| C        | -4.72256200 | -0.45775100      | -1.99704500 |
| C        | -4.93940100 | -0.57611200      | -0.66264600 |
| C        | -2.80694700 | 0.11371600       | -0.93725500 |
| N        | -3.41472300 | -0.03531400      | -2.14300900 |
| H        | -5.37616300 | -0.63101000      | -2.83796000 |
| H        | -5.82109600 | -0.87372300      | -0.11686800 |
| N        | -3.76126600 | -0.22314800      | -0.03535600 |
| C        | -3.56579000 | -0.22799200      | 1.41792500  |
| H        | -4.31725700 | 0.43369400       | 1.86179600  |
| H        | -2.58134500 | 0.20130700       | 1.60360400  |
| C        | -3.62591500 | -1.61972900      | 2.02684600  |
| H        | -3.34739600 | -1.54257600      | 3.08050900  |
| H        | -4.62192300 | -2.06847500      | 1.95019900  |
| H        | -2.90198000 | -2.27925800      | 1.54153600  |
| C        | -2.77533100 | 0.21121300       | -3.42170800 |
| H        | -3.33500000 | 0.95994200       | -3.98909400 |
| H        | -1.76817900 | 0.58426900       | -3.23305900 |
| H        | -2.71243900 | -0.71207800      | -4.00458300 |
| C        | -0.29836400 | 0.03287800       | 3.35213200  |
| O        | -1.25182100 | -0.04531700      | 4.10304300  |
| O        | -0.32581400 | -0.53704400      | 2.14640200  |
| C        | 0.97874600  | 0.76100300       | 3.71613600  |
| H        | 1.18802700  | 1.55287400       | 2.99016700  |
| H        | 0.88203300  | 1.19020300       | 4.71321100  |
| H        | 1.82844700  | 0.07157400       | 3.69160600  |
| Ag       | -0.79930500 | 0.69255300       | -0.51168900 |
| C        | 1.50156200  | 0.11151800       | 0.20873500  |
| C        | 2.24352700  | -0.91265600      | -0.22809900 |
| C        | 1.99496800  | -2.40780500      | -0.09634900 |

|   |             |             |             |
|---|-------------|-------------|-------------|
| O | 3.06666400  | -2.97199400 | -0.89767500 |
| C | 2.17307600  | -2.89981800 | 1.33780100  |
| H | 1.38361700  | -2.48198700 | 1.96684800  |
| H | 2.11604500  | -3.99196400 | 1.37040100  |
| H | 3.14395300  | -2.58958000 | 1.73434800  |
| C | 0.66945000  | -2.85878900 | -0.69320000 |
| H | 0.58658400  | -2.53254400 | -1.73331000 |
| H | 0.58986500  | -3.94947900 | -0.65561800 |
| H | -0.15189900 | -2.42022800 | -0.12132300 |
| C | 3.90148400  | -2.00921000 | -1.32175900 |
| O | 3.45400800  | -0.78533800 | -0.91835300 |
| O | 4.89649800  | -2.18201300 | -1.96340200 |
| H | 0.43525700  | -0.25425200 | 1.47190100  |
| C | 1.91777400  | 1.49522400  | 0.00116800  |
| C | 3.20527400  | 2.03096900  | 0.19741100  |
| C | 3.41765100  | 3.38793300  | 0.00475200  |
| H | 4.01871400  | 1.37269300  | 0.48019200  |
| C | 1.11353600  | 3.61187200  | -0.57452900 |
| H | 4.40817900  | 3.81014100  | 0.15381500  |
| H | 0.25096000  | 4.19801500  | -0.88342000 |
| C | 2.35611300  | 4.20503400  | -0.39277500 |
| H | 2.48609300  | 5.27031400  | -0.55186400 |
| N | 0.89525200  | 2.30943400  | -0.36721300 |

---

| Route O1 | CPO1-4     | HF=-1424.2672333 |             |
|----------|------------|------------------|-------------|
| C        | 4.64724800 | 2.05742400       | 1.37210300  |
| C        | 5.31265700 | 1.03114800       | 0.78317100  |
| C        | 3.10237300 | 0.61577400       | 0.56324000  |
| N        | 3.30002000 | 1.78364200       | 1.22552200  |
| H        | 5.01157100 | 2.94471500       | 1.86652900  |
| H        | 6.37070000 | 0.85373400       | 0.66710400  |
| N        | 4.35331600 | 0.16542800       | 0.29531100  |
| C        | 4.64389100 | -1.10752200      | -0.37083500 |
| H        | 5.37902700 | -0.91212900      | -1.15901100 |

|    |             |             |             |
|----|-------------|-------------|-------------|
| H  | 3.71598900  | -1.44511200 | -0.84266400 |
| C  | 5.14836200  | -2.16370100 | 0.60329700  |
| H  | 5.34270900  | -3.09421600 | 0.06272300  |
| H  | 6.07469100  | -1.85788400 | 1.10076700  |
| H  | 4.39338500  | -2.36789100 | 1.36762200  |
| C  | 2.23056500  | 2.61982900  | 1.73876800  |
| H  | 2.34120500  | 3.64427800  | 1.37338000  |
| H  | 1.28331900  | 2.21286700  | 1.38446000  |
| H  | 2.23815700  | 2.62340000  | 2.83258400  |
| C  | 0.56380200  | -2.88686300 | -1.02620100 |
| O  | 1.71897700  | -2.66401000 | -1.42992300 |
| O  | -0.11618400 | -2.08207900 | -0.28376000 |
| C  | -0.14224800 | -4.17367100 | -1.42724100 |
| H  | -0.92110300 | -3.94456300 | -2.16284500 |
| H  | 0.56204700  | -4.87800600 | -1.87200500 |
| H  | -0.63267800 | -4.62814600 | -0.56204700 |
| Ag | 1.33557500  | -0.41656500 | -0.01280100 |
| C  | -2.16509000 | 0.31803900  | -0.38760800 |
| C  | -3.35702800 | 0.03751600  | 0.15111600  |
| C  | -3.84158100 | -1.31281000 | 0.64074100  |
| O  | -5.15075600 | -0.96842900 | 1.17626800  |
| C  | -4.03251100 | -2.31056800 | -0.49589900 |
| H  | -3.05448200 | -2.56236300 | -0.91369000 |
| H  | -4.50272000 | -3.22260800 | -0.11728900 |
| H  | -4.66086400 | -1.89063700 | -1.28587300 |
| C  | -2.98073300 | -1.88022300 | 1.76141100  |
| H  | -2.87799300 | -1.15756400 | 2.57537100  |
| H  | -3.43767400 | -2.79249200 | 2.15609100  |
| H  | -1.98879600 | -2.11831700 | 1.36385500  |
| C  | -5.42379900 | 0.32723900  | 0.99020100  |
| O  | -4.36048000 | 0.94732500  | 0.36680100  |
| O  | -6.42332500 | 0.89942500  | 1.30274900  |
| H  | -1.47794300 | -0.52318500 | -0.47421400 |
| C  | -1.64146700 | 1.59436200  | -0.86169300 |

|   |             |            |             |
|---|-------------|------------|-------------|
| C | -2.41884600 | 2.74994600 | -1.06129200 |
| C | -1.81050800 | 3.89816800 | -1.54989200 |
| H | -3.47881100 | 2.73335200 | -0.83849600 |
| C | 0.25126300  | 2.69896300 | -1.59544200 |
| H | -2.39859300 | 4.79701100 | -1.71469400 |
| H | 1.32005800  | 2.63537100 | -1.79429900 |
| C | -0.44530800 | 3.88082700 | -1.83219500 |
| H | 0.06603800  | 4.75388100 | -2.22529500 |
| N | -0.31496200 | 1.58720300 | -1.12340200 |

---

| Route N1 | CPN1-1      | HF=-1747.5022426 |             |
|----------|-------------|------------------|-------------|
| C        | -2.90550100 | -1.44922900      | -2.39182300 |
| O        | -3.07726700 | -0.93672900      | -1.26317900 |
| O        | -1.89981900 | -2.15212800      | -2.74527400 |
| C        | -3.96051600 | -1.26027600      | -3.47347400 |
| H        | -4.40743400 | -2.22992600      | -3.71401200 |
| H        | -4.74317100 | -0.57425100      | -3.14580600 |
| H        | -3.49414600 | -0.88858200      | -4.39021500 |
| Ag       | -0.50092100 | -2.46408600      | -1.16793100 |
| C        | 5.90386200  | -0.15442600      | 2.29951200  |
| H        | 6.20943000  | -0.29182400      | 3.31160500  |
| C        | 5.55770800  | 0.00270600       | 1.15048400  |
| C        | 5.14456000  | 0.20063300       | -0.25815600 |
| O        | 3.82437300  | 0.71694300       | -0.31641500 |
| C        | 6.04708100  | 1.26153400       | -0.89806700 |
| H        | 7.09606900  | 0.95630100       | -0.85998500 |
| H        | 5.75311300  | 1.39866900       | -1.94243500 |
| H        | 5.93760600  | 2.21292700       | -0.37174900 |
| C        | 5.25095400  | -1.12942200      | -1.01982800 |
| H        | 4.59179600  | -1.88094400      | -0.57784600 |
| H        | 4.95021100  | -0.97138700      | -2.05880100 |
| H        | 6.27431200  | -1.51573000      | -0.99704000 |
| C        | 2.53527000  | 1.35047200       | -2.71186500 |
| O        | 1.76592500  | 1.99393000       | -2.11134100 |

|   |             |             |             |
|---|-------------|-------------|-------------|
| O | 3.27063200  | 0.73697900  | -3.37857000 |
| H | 3.17518700  | 0.03228000  | -0.02577500 |
| C | -1.34098600 | -0.09592200 | 1.43501900  |
| C | -3.04334500 | 1.72026700  | 1.69942500  |
| C | -1.52048100 | 1.61348500  | -0.28705600 |
| C | -0.69243800 | 2.26369700  | 1.99146700  |
| C | -1.41544200 | -0.58233900 | 2.87819900  |
| C | -1.46182100 | -2.11563100 | 2.92329900  |
| C | -1.42096400 | -2.65802000 | 4.34946200  |
| C | -4.16790400 | 0.80816800  | 1.22785000  |
| C | -5.52918200 | 1.43794400  | 1.54437900  |
| C | -6.69297500 | 0.52317500  | 1.17127100  |
| C | 0.76352200  | 2.26116400  | 1.54759500  |
| C | 1.61351200  | 3.03934900  | 2.56169300  |
| C | 3.02999100  | 3.30187700  | 2.05679000  |
| C | -1.82023700 | 3.02270200  | -0.77907900 |
| C | -1.65516800 | 3.09261700  | -2.30277500 |
| C | -1.95580900 | 4.48207700  | -2.85870800 |
| H | -0.34075100 | -0.26534000 | 1.02423600  |
| H | -2.04173800 | -0.63221100 | 0.78789600  |
| H | -2.99192200 | 1.73003200  | 2.79164600  |
| H | -3.22598600 | 2.75040200  | 1.38536200  |
| H | -2.17630100 | 0.87556800  | -0.76068100 |
| H | -0.49505000 | 1.33260000  | -0.53812600 |
| H | -0.77609800 | 1.94487400  | 3.03426400  |
| H | -1.10037200 | 3.27747900  | 1.93257000  |
| H | -0.54607000 | -0.23275100 | 3.44915600  |
| H | -2.30600500 | -0.19563100 | 3.38979200  |
| H | -0.63260500 | -2.53061500 | 2.33899300  |
| H | -2.37808100 | -2.45611600 | 2.42404000  |
| H | -0.49682600 | -2.36596400 | 4.86112900  |
| H | -2.26166000 | -2.28665700 | 4.94734100  |
| H | -1.46868700 | -3.75101400 | 4.35361200  |
| H | -4.09294500 | 0.58785700  | 0.15749300  |

|   |             |             |             |
|---|-------------|-------------|-------------|
| H | -4.09842600 | -0.16218000 | 1.73237000  |
| H | -5.62405300 | 2.39030800  | 1.00508200  |
| H | -5.58649900 | 1.68668500  | 2.61343600  |
| H | -6.67365700 | 0.27528700  | 0.10516400  |
| H | -6.65076300 | -0.41874400 | 1.72855200  |
| H | -7.65464000 | 0.99733500  | 1.39010200  |
| H | 0.86351400  | 2.72987400  | 0.56302500  |
| H | 1.15751300  | 1.24411000  | 1.44447500  |
| H | 1.65077800  | 2.47711600  | 3.50449700  |
| H | 1.12503600  | 3.99589400  | 2.79785900  |
| H | 3.64172900  | 3.77154800  | 2.83343700  |
| H | 3.01632600  | 3.97236400  | 1.19070300  |
| H | 3.51933000  | 2.37695800  | 1.73945800  |
| H | -1.15267500 | 3.75928100  | -0.31390000 |
| H | -2.84717100 | 3.32007300  | -0.53414000 |
| H | -2.32045500 | 2.35480800  | -2.76809700 |
| H | -0.63363800 | 2.80041400  | -2.56888200 |
| H | -1.83688400 | 4.50406500  | -3.94612500 |
| H | -1.28036700 | 5.23485800  | -2.43702000 |
| H | -2.98238300 | 4.79187200  | -2.63168800 |
| N | -1.64760100 | 1.38071200  | 1.21355000  |
| C | 1.72799800  | -2.14099000 | 0.69809100  |
| O | 0.86095000  | -3.02183300 | 0.38723400  |
| O | 1.75951800  | -0.97503100 | 0.22992000  |
| C | 2.74796500  | -2.58469800 | 1.73433300  |
| H | 3.50903500  | -1.82416300 | 1.91320900  |
| H | 2.23028100  | -2.80741700 | 2.67308400  |
| H | 3.22027500  | -3.51588300 | 1.40939700  |

---

| Route N1 | TSN1-1      | HF=-1747.467408 |             |
|----------|-------------|-----------------|-------------|
| C        | -2.25654400 | -2.92792500     | -1.20068900 |
| O        | -2.29620700 | -1.94303600     | -0.42141700 |
| O        | -1.20212600 | -3.54671100     | -1.54636100 |
| C        | -3.56081900 | -3.47390300     | -1.76631200 |

|    |             |             |             |
|----|-------------|-------------|-------------|
| H  | -3.95656600 | -4.22722200 | -1.07597500 |
| H  | -4.30487400 | -2.68001700 | -1.86175300 |
| H  | -3.39505000 | -3.95781000 | -2.73043100 |
| Ag | 0.48290600  | -2.58968900 | -0.56627100 |
| C  | 3.73194200  | 1.86329600  | 1.63759600  |
| H  | 3.53865500  | 2.09188400  | 2.66060600  |
| C  | 3.95573400  | 1.57875600  | 0.48301700  |
| C  | 4.33320200  | 1.23289600  | -0.90257800 |
| O  | 3.51619300  | 0.16964400  | -1.41869000 |
| C  | 4.19758400  | 2.44716100  | -1.82635400 |
| H  | 4.87169300  | 3.24323900  | -1.49798900 |
| H  | 4.47241300  | 2.14805700  | -2.84220400 |
| H  | 3.17449400  | 2.82199900  | -1.82750700 |
| C  | 5.78454500  | 0.72378200  | -0.90873000 |
| H  | 5.87976800  | -0.16489800 | -0.28223500 |
| H  | 6.06583200  | 0.46593400  | -1.93376200 |
| H  | 6.45872400  | 1.50025400  | -0.53624100 |
| C  | 1.75871400  | 0.31445500  | -1.67279200 |
| O  | 1.38024300  | 1.38069500  | -1.26020600 |
| O  | 1.46157400  | -0.72122100 | -2.19582900 |
| H  | 3.67523400  | -0.76271500 | -0.83355700 |
| C  | -1.14764300 | 0.44985300  | 1.32401300  |
| C  | -3.45714100 | 1.42963300  | 1.24035600  |
| C  | -1.94966100 | 1.40029200  | -0.76439500 |
| C  | -1.54562100 | 2.92424800  | 1.19540000  |
| C  | -0.94160400 | 0.46082100  | 2.83292300  |
| C  | -0.26286400 | -0.84266300 | 3.27640200  |
| C  | 0.07039100  | -0.84498200 | 4.76581000  |
| C  | -4.27436400 | 0.26566400  | 0.69510100  |
| C  | -5.53123400 | 0.05884400  | 1.54834400  |
| C  | -6.44322900 | -1.02664500 | 0.98271100  |
| C  | -0.13864300 | 3.32873800  | 0.78681700  |
| C  | 0.20876500  | 4.69705900  | 1.38704400  |
| C  | 1.56260000  | 5.21533400  | 0.90841400  |

|   |             |             |             |
|---|-------------|-------------|-------------|
| C | -2.73578600 | 2.42033200  | -1.57511000 |
| C | -2.62767400 | 2.09573900  | -3.07030000 |
| C | -3.36992000 | 3.10218400  | -3.94528600 |
| H | -0.18499600 | 0.54346100  | 0.81598200  |
| H | -1.59106300 | -0.48879500 | 0.97907000  |
| H | -3.39055600 | 1.37414300  | 2.32956900  |
| H | -3.94699100 | 2.37796700  | 1.00151100  |
| H | -2.28250900 | 0.37627400  | -0.96208000 |
| H | -0.88729200 | 1.44548400  | -1.02046800 |
| H | -1.64983100 | 2.93240200  | 2.28430400  |
| H | -2.26713600 | 3.64422400  | 0.79959700  |
| H | -0.31649600 | 1.31097300  | 3.13473700  |
| H | -1.89088600 | 0.55702500  | 3.37538200  |
| H | 0.64589400  | -1.01152100 | 2.68679500  |
| H | -0.92857900 | -1.68330100 | 3.04431000  |
| H | 0.76789000  | -0.03869700 | 5.02070100  |
| H | -0.82688400 | -0.71366600 | 5.38224100  |
| H | 0.53793300  | -1.78949000 | 5.05950600  |
| H | -4.57755100 | 0.47879600  | -0.33705600 |
| H | -3.69330900 | -0.66207200 | 0.64306500  |
| H | -6.09108800 | 1.00144300  | 1.63089600  |
| H | -5.23350800 | -0.20920100 | 2.57111800  |
| H | -6.79731000 | -0.76374700 | -0.02005900 |
| H | -5.91560400 | -1.98258000 | 0.90687400  |
| H | -7.32233200 | -1.17519800 | 1.61724200  |
| H | -0.05480500 | 3.37925800  | -0.30280900 |
| H | 0.60522800  | 2.59257900  | 1.10596700  |
| H | 0.20652600  | 4.62588200  | 2.48342100  |
| H | -0.57388800 | 5.42438900  | 1.12899600  |
| H | 1.81050600  | 6.16851100  | 1.38565400  |
| H | 1.56153900  | 5.37466100  | -0.17503600 |
| H | 2.36176500  | 4.50189600  | 1.13230300  |
| H | -2.35073600 | 3.43424100  | -1.40706700 |
| H | -3.79500600 | 2.43025600  | -1.28839500 |

|   |             |             |             |
|---|-------------|-------------|-------------|
| H | -3.02019400 | 1.08709100  | -3.24959200 |
| H | -1.56919300 | 2.06473600  | -3.35641700 |
| H | -3.28005200 | 2.84284100  | -5.00429700 |
| H | -2.96959200 | 4.11417800  | -3.81726600 |
| H | -4.43784300 | 3.13389900  | -3.70123600 |
| N | -2.02492300 | 1.56016600  | 0.74697700  |
| C | 3.25271900  | -2.19340400 | 0.84044300  |
| O | 2.00666600  | -1.99104500 | 0.89035500  |
| O | 4.03708900  | -1.77458400 | -0.06165100 |
| C | 3.88602300  | -2.96192200 | 1.98492300  |
| H | 4.07241000  | -2.26624400 | 2.81065500  |
| H | 3.20821300  | -3.73759800 | 2.34686100  |
| H | 4.84056900  | -3.39479900 | 1.68176200  |

---

| Route N1 | CPN1-2     | HF=-1747.4940086 |             |
|----------|------------|------------------|-------------|
| C        | 1.45696100 | -3.33497300      | 0.72965800  |
| O        | 2.70481800 | -3.17704100      | 0.53735500  |
| O        | 0.58467400 | -2.45930800      | 0.49522400  |
| C        | 1.01809300 | -4.69764400      | 1.24486100  |
| H        | 0.12183700 | -4.60507100      | 1.86203700  |
| H        | 0.77234200 | -5.33638900      | 0.38935100  |
| H        | 1.81915100 | -5.18065600      | 1.80708400  |
| Ag       | 2.77243300 | -1.07351400      | -0.17894200 |
| C        | 5.21485600 | -0.25425600      | 0.05217400  |
| H        | 5.67701900 | -1.18767900      | 0.29158600  |
| C        | 4.77392800 | 0.85083500       | -0.19964100 |
| C        | 4.34161300 | 2.23590500       | -0.48040800 |
| O        | 3.07729100 | 2.52876700       | 0.13706500  |
| C        | 5.31595500 | 3.18551600       | 0.23137100  |
| H        | 6.33144200 | 3.05045700       | -0.14950300 |
| H        | 4.99870500 | 4.21635200       | 0.05224200  |
| H        | 5.30888700 | 2.99799500       | 1.30720500  |
| C        | 4.32145400 | 2.51889900       | -1.98672100 |
| H        | 3.62780800 | 1.84958900       | -2.49365900 |

|   |             |             |             |
|---|-------------|-------------|-------------|
| H | 4.00410200  | 3.55424200  | -2.14343100 |
| H | 5.32328000  | 2.39186200  | -2.40681400 |
| C | 1.91584200  | 1.86291100  | -0.20448700 |
| O | 2.01635800  | 0.92085900  | -1.07636000 |
| O | 0.90611400  | 2.25387500  | 0.37337100  |
| H | 0.61868500  | 0.63397300  | -1.79153800 |
| C | -2.40441100 | 0.17516700  | 2.19686300  |
| C | -2.21131200 | 1.59952100  | 0.14547900  |
| C | -4.35944900 | 0.49386900  | 0.78776000  |
| C | -2.42817300 | -0.82913000 | -0.09578200 |
| C | -0.90842200 | 0.01047700  | 2.42603200  |
| C | -0.61727500 | -0.06685900 | 3.93006100  |
| C | 0.87399800  | -0.22963000 | 4.21491400  |
| C | -2.52899200 | 2.92279200  | 0.82798900  |
| C | -1.86436500 | 4.07629400  | 0.06483400  |
| C | -2.12911700 | 5.43125400  | 0.71553400  |
| C | -3.10765200 | -2.15520600 | 0.21649800  |
| C | -2.51152200 | -3.26004700 | -0.66582000 |
| C | -3.20457900 | -4.60362300 | -0.45749300 |
| C | -5.03708100 | 0.73632700  | -0.55361500 |
| C | -6.56137200 | 0.74542200  | -0.39178800 |
| C | -7.28631700 | 1.02307500  | -1.70641300 |
| H | -2.94778800 | -0.69738600 | 2.57060300  |
| H | -2.78088800 | 1.04626100  | 2.74073100  |
| H | -1.13131200 | 1.43649500  | 0.13717400  |
| H | -2.52616500 | 1.61075900  | -0.89908600 |
| H | -4.58357800 | 1.31174100  | 1.47719000  |
| H | -4.73810700 | -0.42334200 | 1.24511300  |
| H | -1.34871400 | -0.92408000 | 0.03074800  |
| H | -2.59894600 | -0.54547700 | -1.13675000 |
| H | -0.53350100 | -0.89991100 | 1.94370300  |
| H | -0.35080800 | 0.85050000  | 1.99610300  |
| H | -1.16959000 | -0.90762900 | 4.37265400  |
| H | -0.98875500 | 0.84003300  | 4.42752200  |

|   |             |             |             |
|---|-------------|-------------|-------------|
| H | 1.26476500  | -1.14138300 | 3.75197100  |
| H | 1.44326700  | 0.61539700  | 3.81381200  |
| H | 1.06827500  | -0.28668700 | 5.29059700  |
| H | -3.61059100 | 3.10706300  | 0.87794100  |
| H | -2.15225200 | 2.92761900  | 1.85788100  |
| H | -2.23395200 | 4.08507200  | -0.96924700 |
| H | -0.78787200 | 3.88327700  | 0.01428400  |
| H | -3.20147900 | 5.65484700  | 0.76662800  |
| H | -1.73305900 | 5.46437100  | 1.73662900  |
| H | -1.64969700 | 6.23718000  | 0.15147600  |
| H | -4.18872400 | -2.10068000 | 0.03314700  |
| H | -2.97120900 | -2.43467500 | 1.26907200  |
| H | -1.44366900 | -3.33921900 | -0.43339500 |
| H | -2.58391200 | -2.95794800 | -1.71758700 |
| H | -2.75974400 | -5.37651000 | -1.09188200 |
| H | -4.27213700 | -4.55089100 | -0.70251300 |
| H | -3.11943400 | -4.94181400 | 0.58183000  |
| H | -4.75502100 | -0.03609100 | -1.27747300 |
| H | -4.71670600 | 1.69528700  | -0.97540900 |
| H | -6.84667700 | 1.50201600  | 0.35162800  |
| H | -6.89098200 | -0.22059000 | 0.01339800  |
| H | -8.37142200 | 1.02064400  | -1.56648900 |
| H | -7.04505300 | 0.26632500  | -2.46034700 |
| H | -7.00514600 | 1.99931200  | -2.11558700 |
| N | -2.85387500 | 0.36114100  | 0.75835200  |
| C | -0.50993100 | -0.56016200 | -2.89847100 |
| O | -0.31396200 | 0.52913100  | -2.16376300 |
| O | -1.63106800 | -0.85360300 | -3.27739700 |
| C | 0.70207500  | -1.41793500 | -3.18201000 |
| H | 1.58380300  | -0.81420000 | -3.41295300 |
| H | 0.91987000  | -2.00837300 | -2.28337400 |
| H | 0.48379800  | -2.09906600 | -4.00472700 |

---



---

Route N1

TSN1-2

HF=-1747.4686364

---

---

|    |             |             |             |
|----|-------------|-------------|-------------|
| Ag | -3.09695900 | 1.49341700  | -0.37606000 |
| H  | -0.68585900 | -1.09076900 | -1.53389900 |
| C  | -0.12232700 | -1.77540200 | -3.25618400 |
| O  | -0.97020300 | -2.64223700 | -3.32757800 |
| O  | 0.02750600  | -0.94135400 | -2.22736400 |
| C  | 0.89704800  | -1.51551900 | -4.34121800 |
| H  | 1.91089300  | -1.60734100 | -3.93963700 |
| H  | 0.75724000  | -2.22676500 | -5.15460600 |
| H  | 0.78681100  | -0.49420500 | -4.71782500 |
| C  | -4.47602200 | -0.17423300 | -0.61454500 |
| H  | -5.48054300 | 0.20250300  | -0.72701500 |
| C  | -3.93332400 | -1.27270000 | -0.37216600 |
| C  | -3.74820300 | -2.69855000 | -0.00284300 |
| O  | -2.66336800 | -2.81827600 | 0.92061300  |
| C  | -4.99995200 | -3.14841900 | 0.76083300  |
| H  | -5.88703900 | -3.07034400 | 0.12714500  |
| H  | -4.87421300 | -4.19215500 | 1.06140300  |
| H  | -5.14118800 | -2.53764800 | 1.65515500  |
| C  | -3.49401500 | -3.57290200 | -1.23246900 |
| H  | -2.62141000 | -3.22755400 | -1.79067300 |
| H  | -3.33108400 | -4.60329100 | -0.90199100 |
| H  | -4.36184000 | -3.55308300 | -1.89883600 |
| C  | -1.58529300 | -2.00912900 | 0.63402000  |
| O  | -1.79043900 | -1.19329600 | -0.33255000 |
| O  | -0.58372100 | -2.14878000 | 1.33305800  |
| C  | 2.29837300  | -1.31348200 | 0.66484400  |
| C  | 2.46390200  | 0.71897600  | 2.12414000  |
| C  | 2.03962100  | 0.89686600  | -0.33959800 |
| C  | 4.27161900  | 0.21540500  | 0.58373000  |
| C  | 2.86552400  | -2.27527500 | 1.69953900  |
| C  | 2.35015100  | -3.69531200 | 1.42970800  |
| C  | 2.86226800  | -4.70293700 | 2.45521500  |
| C  | 1.00465200  | 0.70828200  | 2.55266700  |
| C  | 0.88730400  | 1.18936800  | 4.00426300  |

|   |             |             |             |
|---|-------------|-------------|-------------|
| C | -0.56540000 | 1.23346700  | 4.47218300  |
| C | 4.83426700  | -0.27610000 | -0.74261000 |
| C | 6.35726700  | -0.10274600 | -0.77740400 |
| C | 6.97252100  | -0.59485000 | -2.08501900 |
| C | 2.46749000  | 2.34118900  | -0.55355000 |
| C | 1.79473600  | 2.89724400  | -1.81412400 |
| C | 2.17760700  | 4.34937700  | -2.08494900 |
| H | 2.55262900  | -1.64296700 | -0.34492900 |
| H | 1.20577000  | -1.30584900 | 0.73775000  |
| H | 3.08283300  | 0.15885000  | 2.83179000  |
| H | 2.84585000  | 1.74377000  | 2.09744300  |
| H | 0.97803000  | 0.86669700  | -0.08787300 |
| H | 2.16839200  | 0.30955900  | -1.25043700 |
| H | 4.70612100  | -0.35383200 | 1.40871800  |
| H | 4.54135400  | 1.26196200  | 0.74174000  |
| H | 3.96395900  | -2.28721100 | 1.69168400  |
| H | 2.55180100  | -1.97943700 | 2.70745000  |
| H | 2.65894800  | -4.00743100 | 0.42254300  |
| H | 1.25526600  | -3.67273500 | 1.43216600  |
| H | 3.95780900  | -4.75069900 | 2.46564000  |
| H | 2.53068100  | -4.44212100 | 3.46633800  |
| H | 2.48873700  | -5.70787200 | 2.23662500  |
| H | 0.41599100  | 1.37353300  | 1.91076800  |
| H | 0.57031300  | -0.29447700 | 2.46688900  |
| H | 1.33209900  | 2.18983600  | 4.10030100  |
| H | 1.46751100  | 0.53058500  | 4.66616600  |
| H | -1.15672100 | 1.90653500  | 3.84341500  |
| H | -1.02539900 | 0.24121600  | 4.41798200  |
| H | -0.63897000 | 1.58352400  | 5.50673600  |
| H | 4.39279400  | 0.27695100  | -1.57927800 |
| H | 4.59408500  | -1.33423400 | -0.89603800 |
| H | 6.80627700  | -0.64373600 | 0.06610500  |
| H | 6.60767000  | 0.95613400  | -0.62994600 |
| H | 8.05788100  | -0.45806300 | -2.08550100 |

|   |             |             |             |
|---|-------------|-------------|-------------|
| H | 6.56840300  | -0.04921900 | -2.94450600 |
| H | 6.77165500  | -1.65997800 | -2.24314800 |
| H | 3.55544900  | 2.43522600  | -0.66596000 |
| H | 2.15554100  | 2.95279700  | 0.29893600  |
| H | 0.71147100  | 2.81356600  | -1.68530500 |
| H | 2.06781300  | 2.27628500  | -2.67818300 |
| H | 1.68589200  | 4.72309600  | -2.98834700 |
| H | 3.25933700  | 4.46428200  | -2.22427200 |
| H | 1.87780000  | 4.99698400  | -1.25433400 |
| N | 2.77217500  | 0.13051500  | 0.75654500  |
| C | -1.34074900 | 3.61020600  | 0.41984400  |
| O | -0.54318200 | 2.64660700  | 0.43864900  |
| O | -2.55676100 | 3.55058800  | 0.04311000  |
| C | -0.86984300 | 4.99425300  | 0.85206500  |
| H | -1.59539800 | 5.43989400  | 1.53752900  |
| H | 0.11217100  | 4.94931100  | 1.32657200  |
| H | -0.81575600 | 5.64724900  | -0.02517600 |

---

| Route N1 | CPN1-3      | HF=-1747.5055141 |             |
|----------|-------------|------------------|-------------|
| C        | 0.50766700  | 2.58231800       | -1.05776100 |
| O        | -0.59471700 | 3.09251100       | -0.99431800 |
| O        | 0.70062200  | 1.36691800       | -0.53295700 |
| C        | 1.70396000  | 3.25897300       | -1.67806900 |
| H        | 2.26761600  | 2.58073700       | -2.32369300 |
| H        | 1.37308300  | 4.13081600       | -2.24149800 |
| H        | 2.38572800  | 3.59002200       | -0.88739400 |
| Ag       | 2.16765500  | -1.72766100      | -0.03888300 |
| C        | 4.10104500  | 0.52878400       | -0.89118900 |
| C        | 4.86890000  | 0.68686300       | 0.41263900  |
| O        | 5.78112000  | 1.77517700       | 0.10548200  |
| C        | 3.99992900  | 1.11480100       | 1.58634100  |
| H        | 3.26129200  | 0.33607900       | 1.79552500  |
| H        | 4.61477200  | 1.26952600       | 2.47769800  |
| H        | 3.47167400  | 2.04473100       | 1.35973500  |

|   |             |             |             |
|---|-------------|-------------|-------------|
| C | 5.70476600  | -0.54815200 | 0.73725600  |
| H | 6.34163600  | -0.81492700 | -0.11038900 |
| H | 6.33759500  | -0.35726200 | 1.60918500  |
| H | 5.04262300  | -1.39196100 | 0.94964900  |
| C | 5.69714300  | 2.11260800  | -1.19319000 |
| O | 4.73899400  | 1.37029600  | -1.81353100 |
| O | 6.35716400  | 2.95062800  | -1.73657300 |
| C | -2.71072400 | -0.10898800 | 1.44531900  |
| C | -3.52708700 | 1.69275700  | -0.11076700 |
| C | -4.54892300 | -0.59081000 | -0.06785100 |
| C | -2.27377400 | -0.17327700 | -1.03125200 |
| C | -1.56058200 | 0.75582200  | 1.93556800  |
| C | -1.18748300 | 0.33092100  | 3.36136400  |
| C | -0.05646700 | 1.17726500  | 3.93919800  |
| C | -4.45287900 | 2.33878300  | 0.90974600  |
| C | -4.57623200 | 3.84242800  | 0.63373900  |
| C | -5.49438900 | 4.54755300  | 1.62849100  |
| C | -2.02252900 | -1.65773200 | -1.24442400 |
| C | -1.00858500 | -1.84453900 | -2.38113700 |
| C | -0.69188400 | -3.31529900 | -2.63842600 |
| C | -5.30357700 | -0.47737600 | -1.38594100 |
| C | -6.52389100 | -1.40601600 | -1.37963200 |
| C | -7.33363500 | -1.32013000 | -2.67080500 |
| H | -2.37809000 | -1.15096800 | 1.42273600  |
| H | -3.56287800 | -0.02615400 | 2.12705600  |
| H | -2.54254700 | 2.17110900  | -0.12487300 |
| H | -3.94143900 | 1.81125300  | -1.11518000 |
| H | -5.19226200 | -0.27558100 | 0.75738700  |
| H | -4.26877800 | -1.62919500 | 0.12411100  |
| H | -1.34391500 | 0.33561400  | -0.77039400 |
| H | -2.65219400 | 0.28969800  | -1.94745700 |
| H | -0.68860300 | 0.63341500  | 1.28915000  |
| H | -1.82440800 | 1.82001900  | 1.93321800  |
| H | -0.89108100 | -0.72282500 | 3.33461600  |

|   |             |             |             |
|---|-------------|-------------|-------------|
| H | -2.06957200 | 0.40574400  | 4.01416200  |
| H | 0.84563400  | 1.09621600  | 3.32446500  |
| H | -0.33018400 | 2.23763200  | 3.98986000  |
| H | 0.20116600  | 0.85171700  | 4.95190800  |
| H | -5.45372700 | 1.88958400  | 0.87550000  |
| H | -4.07381400 | 2.19447600  | 1.92762500  |
| H | -4.95180300 | 3.99593300  | -0.38653200 |
| H | -3.57827800 | 4.29681500  | 0.66098000  |
| H | -6.50960100 | 4.13625300  | 1.59743200  |
| H | -5.12479500 | 4.44273200  | 2.65436800  |
| H | -5.56339400 | 5.61711800  | 1.40941500  |
| H | -2.94626300 | -2.18673700 | -1.51282700 |
| H | -1.61074700 | -2.10810200 | -0.33407200 |
| H | -0.08358900 | -1.31452900 | -2.12303100 |
| H | -1.38971100 | -1.37976400 | -3.30169700 |
| H | 0.02382900  | -3.42419200 | -3.45896600 |
| H | -1.59337600 | -3.87892500 | -2.90616500 |
| H | -0.25291200 | -3.78054000 | -1.75026000 |
| H | -4.65751800 | -0.74212300 | -2.23029500 |
| H | -5.64265100 | 0.55187400  | -1.55290800 |
| H | -7.16679700 | -1.15747600 | -0.52486600 |
| H | -6.19130400 | -2.44012500 | -1.22165400 |
| H | -8.19516100 | -1.99347500 | -2.64007800 |
| H | -6.72692700 | -1.59674300 | -3.53972900 |
| H | -7.71091200 | -0.30541100 | -2.83809100 |
| N | -3.27160500 | 0.20751000  | 0.05915200  |
| C | 3.05452900  | -0.23642600 | -1.21111800 |
| H | 1.60066200  | 0.96769200  | -0.67991500 |
| H | 2.79021600  | -0.16861700 | -2.27123400 |
| C | 0.27704300  | -3.24802500 | 1.62477800  |
| O | -0.48005000 | -2.26368700 | 1.47705900  |
| O | 1.43521000  | -3.38074800 | 1.10482300  |
| C | -0.16812100 | -4.41801400 | 2.49508400  |
| H | 0.50962000  | -4.51565900 | 3.34887600  |

|   |             |             |            |
|---|-------------|-------------|------------|
| H | -1.18827000 | -4.27639100 | 2.85636500 |
| H | -0.10025900 | -5.35096300 | 1.92798100 |

---

| Route N1 | TSN1-3      | HF=-1747.4915672 |             |
|----------|-------------|------------------|-------------|
| C        | 0.29566300  | 2.22835000       | -1.59965200 |
| O        | -0.81994800 | 2.73504700       | -1.48877500 |
| O        | 0.69940300  | 1.25015200       | -0.82901700 |
| C        | 1.26598600  | 2.71064500       | -2.66318100 |
| H        | 1.52105300  | 1.89025700       | -3.34157100 |
| H        | 0.81918000  | 3.52852800       | -3.22853700 |
| H        | 2.20203100  | 3.04593800       | -2.20746500 |
| Ag       | 2.10551700  | -1.51858400      | 0.07470400  |
| C        | 4.11869500  | 0.51550700       | -0.85842100 |
| C        | 4.49852300  | 1.23392800       | 0.43063400  |
| O        | 5.88004200  | 1.60244800       | 0.18021500  |
| C        | 3.69260600  | 2.51290400       | 0.63159500  |
| H        | 2.62806600  | 2.27446600       | 0.69438500  |
| H        | 4.00688600  | 3.01696100       | 1.54984800  |
| H        | 3.84627600  | 3.19588800       | -0.20822400 |
| C        | 4.48024100  | 0.33875700       | 1.66403000  |
| H        | 5.05358000  | -0.57587400      | 1.49227100  |
| H        | 4.91351300  | 0.87407300       | 2.51405700  |
| H        | 3.45066100  | 0.06255000       | 1.90939900  |
| C        | 6.27151300  | 1.18997400       | -1.03461400 |
| O        | 5.23678000  | 0.54483600       | -1.66420400 |
| O        | 7.35081200  | 1.34942800       | -1.51919600 |
| C        | -2.59378800 | 0.05699700       | 1.46687400  |
| C        | -3.56399100 | 1.63015600       | -0.23867600 |
| C        | -4.48905300 | -0.66748000      | 0.12396300  |
| C        | -2.28082500 | -0.28650700      | -1.00032900 |
| C        | -1.49440900 | 1.05533000       | 1.79913000  |
| C        | -0.94955000 | 0.75238000       | 3.20090500  |
| C        | 0.11758100  | 1.75301200       | 3.63575400  |
| C        | -4.49232700 | 2.34553400       | 0.73212200  |

|   |             |             |             |
|---|-------------|-------------|-------------|
| C | -4.64302300 | 3.81766800  | 0.32919400  |
| C | -5.57851900 | 4.58792200  | 1.25721600  |
| C | -1.97460800 | -1.77515900 | -1.05012900 |
| C | -1.01750300 | -2.05455800 | -2.21680400 |
| C | -0.61161300 | -3.52381600 | -2.29822100 |
| C | -5.30197900 | -0.73248000 | -1.16098500 |
| C | -6.48397100 | -1.69632400 | -1.00298600 |
| C | -7.34826600 | -1.77608300 | -2.25862500 |
| H | -2.18919400 | -0.95715900 | 1.53302200  |
| H | -3.41454700 | 0.14927100  | 2.18520300  |
| H | -2.59709900 | 2.13477500  | -0.34321800 |
| H | -4.00751100 | 1.62170400  | -1.23778300 |
| H | -5.10645800 | -0.27601800 | 0.93631500  |
| H | -4.16229500 | -1.66642600 | 0.42322700  |
| H | -1.36228100 | 0.28613700  | -0.85159900 |
| H | -2.72151700 | 0.04871600  | -1.94364300 |
| H | -0.68034000 | 0.99933800  | 1.06999500  |
| H | -1.87313500 | 2.08417500  | 1.77642300  |
| H | -0.53840500 | -0.26268000 | 3.19796800  |
| H | -1.77388600 | 0.76278600  | 3.92905600  |
| H | 0.96769400  | 1.74482500  | 2.94586500  |
| H | -0.27492400 | 2.77618600  | 3.66321800  |
| H | 0.49716200  | 1.51560800  | 4.63469500  |
| H | -5.48620600 | 1.87943400  | 0.74638200  |
| H | -4.10452800 | 2.29605300  | 1.75594500  |
| H | -5.01596100 | 3.87678700  | -0.70173000 |
| H | -3.65340900 | 4.29030900  | 0.31990800  |
| H | -6.58662800 | 4.15822900  | 1.25622300  |
| H | -5.21367000 | 4.57556400  | 2.29017300  |
| H | -5.66423200 | 5.63424000  | 0.94933200  |
| H | -2.88402300 | -2.37211400 | -1.19750500 |
| H | -1.49373600 | -2.09894600 | -0.12009800 |
| H | -0.12231900 | -1.43185600 | -2.09637400 |
| H | -1.48345700 | -1.74454700 | -3.16284500 |

|   |             |             |             |
|---|-------------|-------------|-------------|
| H | 0.05883700  | -3.70010200 | -3.14514900 |
| H | -1.48509400 | -4.17379500 | -2.42615700 |
| H | -0.08916100 | -3.83657900 | -1.38845200 |
| H | -4.67927300 | -1.06509800 | -1.99887100 |
| H | -5.68663000 | 0.25985100  | -1.42391500 |
| H | -7.10165400 | -1.38122000 | -0.15135000 |
| H | -6.10642000 | -2.69631600 | -0.75253700 |
| H | -8.18228400 | -2.46994100 | -2.11832800 |
| H | -6.76779600 | -2.12453800 | -3.11960500 |
| H | -7.76940000 | -0.79799100 | -2.51546400 |
| N | -3.24168800 | 0.18348200  | 0.08855600  |
| C | 2.94533100  | -0.01070700 | -1.26351200 |
| H | 1.75965500  | 0.68176600  | -1.00390800 |
| H | 3.01039400  | -0.40283100 | -2.28283200 |
| C | 0.45962700  | -3.10246800 | 1.82820900  |
| O | -0.30482800 | -2.12542200 | 1.67035600  |
| O | 1.59959300  | -3.24166500 | 1.26795100  |
| C | 0.05078300  | -4.24531800 | 2.74767900  |
| H | 0.78858400  | -4.35326900 | 3.54830000  |
| H | -0.93545500 | -4.06959600 | 3.18024100  |
| H | 0.04830200  | -5.18602800 | 2.18906100  |

---

| Route N1 | CPN1-4      | HF=-1747.5175256 |             |
|----------|-------------|------------------|-------------|
| C        | -0.21488800 | 2.67404700       | -1.42491200 |
| O        | -1.41944200 | 2.91551000       | -1.20273700 |
| O        | 0.42692400  | 1.63432100       | -1.05035300 |
| C        | 0.58562000  | 3.72306300       | -2.20687600 |
| H        | 1.16205600  | 3.24797000       | -3.00773800 |
| H        | -0.07285800 | 4.48354600       | -2.63102700 |
| H        | 1.29856400  | 4.21597700       | -1.53546200 |
| Ag       | 2.20295900  | -1.10041000      | 0.27646800  |
| C        | 3.97202800  | 0.26132700       | -1.08970700 |
| C        | 4.31063400  | 1.56696300       | -0.39442500 |
| O        | 5.62046700  | 1.25670900       | 0.15393700  |

|   |             |             |             |
|---|-------------|-------------|-------------|
| C | 4.48327400  | 2.68583100  | -1.42233900 |
| H | 3.51198000  | 2.94459500  | -1.84958700 |
| H | 4.90475200  | 3.56683300  | -0.93113800 |
| H | 5.15553300  | 2.37946000  | -2.22883000 |
| C | 3.36128800  | 1.95345800  | 0.72419400  |
| H | 3.36885400  | 1.19422200  | 1.51258800  |
| H | 3.66462200  | 2.90886000  | 1.16158400  |
| H | 2.34751600  | 2.04719900  | 0.31442300  |
| C | 6.09340900  | 0.11782300  | -0.36675900 |
| O | 5.11988500  | -0.46816400 | -1.16503500 |
| O | 7.17133000  | -0.35766500 | -0.19823100 |
| C | -2.43216200 | -0.11117200 | 1.34546700  |
| C | -3.80727700 | 1.28068300  | -0.23317600 |
| C | -4.25391500 | -1.15684700 | 0.12192300  |
| C | -2.24177400 | -0.34196900 | -1.13978400 |
| C | -1.51285700 | 1.06799700  | 1.62527100  |
| C | -0.82754300 | 0.85841100  | 2.98061700  |
| C | 0.03872800  | 2.04894600  | 3.38290600  |
| C | -4.77026700 | 1.79176000  | 0.82830800  |
| C | -5.23045400 | 3.21123900  | 0.47315600  |
| C | -6.19633600 | 3.79218500  | 1.50221900  |
| C | -1.71305600 | -1.76243500 | -1.27443900 |
| C | -0.74606900 | -1.82983600 | -2.46297300 |
| C | -0.11255200 | -3.20984400 | -2.61815200 |
| C | -5.15338200 | -1.33458400 | -1.09390500 |
| C | -6.10216200 | -2.52170900 | -0.89347000 |
| C | -7.05529500 | -2.71582400 | -2.07006600 |
| H | -1.84991400 | -1.03788600 | 1.35145600  |
| H | -3.19796900 | -0.18634700 | 2.12456000  |
| H | -2.95515400 | 1.95707400  | -0.39949800 |
| H | -4.32555600 | 1.19624300  | -1.19228500 |
| H | -4.85919600 | -0.91110000 | 0.99817600  |
| H | -3.72472100 | -2.08603600 | 0.34806200  |
| H | -1.41817000 | 0.37398900  | -1.02370200 |

|   |             |             |             |
|---|-------------|-------------|-------------|
| H | -2.79180500 | -0.05239200 | -2.03961900 |
| H | -0.76046200 | 1.17684800  | 0.83488300  |
| H | -2.07418400 | 2.00824500  | 1.64874200  |
| H | -0.21626000 | -0.04940900 | 2.92731700  |
| H | -1.58326400 | 0.68122000  | 3.76022700  |
| H | 0.80791200  | 2.24568900  | 2.62972500  |
| H | -0.55988500 | 2.96100600  | 3.48611900  |
| H | 0.54153700  | 1.86898800  | 4.33850700  |
| H | -5.65302000 | 1.14405000  | 0.91716700  |
| H | -4.29267400 | 1.81310700  | 1.81472100  |
| H | -5.70825600 | 3.20154700  | -0.51544500 |
| H | -4.34984800 | 3.85724600  | 0.37638100  |
| H | -7.10144600 | 3.18074400  | 1.59258700  |
| H | -5.73426300 | 3.84891300  | 2.49404900  |
| H | -6.50663700 | 4.80394100  | 1.22413600  |
| H | -2.52470400 | -2.48184400 | -1.44651500 |
| H | -1.17794600 | -2.07333200 | -0.37054300 |
| H | 0.03076100  | -1.06922500 | -2.32394800 |
| H | -1.27471500 | -1.55847600 | -3.38726200 |
| H | 0.58328500  | -3.23591700 | -3.46300500 |
| H | -0.87150200 | -3.98104900 | -2.79343500 |
| H | 0.43992800  | -3.49052700 | -1.71494200 |
| H | -4.55717400 | -1.49960200 | -1.99834100 |
| H | -5.74757900 | -0.42971100 | -1.26600200 |
| H | -6.68152400 | -2.37465900 | 0.02777600  |
| H | -5.51363800 | -3.43591800 | -0.74137500 |
| H | -7.71837500 | -3.56989200 | -1.90363800 |
| H | -6.50656500 | -2.89759300 | -3.00048700 |
| H | -7.68372700 | -1.83166700 | -2.22274900 |
| N | -3.19514300 | -0.08521600 | 0.02407000  |
| C | 2.81747400  | -0.10412100 | -1.70276100 |
| H | 1.97510100  | 0.60234900  | -1.71444500 |
| H | 2.82464200  | -0.97026400 | -2.35986000 |
| C | 1.06801000  | -2.61793400 | 2.17297500  |

|   |             |             |            |
|---|-------------|-------------|------------|
| O | 0.26904500  | -2.11933300 | 1.32155100 |
| O | 2.31091200  | -2.39373200 | 2.16143600 |
| C | 0.50015600  | -3.49651400 | 3.27085900 |
| H | 1.28583900  | -4.08957300 | 3.74007000 |
| H | 0.04048000  | -2.86019500 | 4.03483500 |
| H | -0.28020000 | -4.14828400 | 2.87083000 |

---
